# Supplementary material for: A convergent synthesis of vinyloxyimidazopyridine via Cu(i)-catalyzed three-component coupling
Source: Royal Society of Chemistry journal article supplement (doi:10.1039/c7ob02883k), 2017-12-07
Supplement: c7ob02883k1.pdf [file c7ob02883k1.pdf]

## SUPPORTING INFORMATION

### **A convergent synthesis of vinyloxyimidazopyridine *via* Cu(I)-catalyzed three-component coupling**

Sadhanendu Samanta, Susmita Mondal and Alakananda Hajra\*

*Department of Chemistry, Visva-Bharati (A Central University), Santiniketan 731235, India*

### **Contents**

|                                              |         |
|----------------------------------------------|---------|
| 1. X-ray crystallographic data               | S2-S5   |
| 2. General information                       | S5      |
| 3. Experimental procedure                    | S6-S9   |
| 4. Characterization data of the substrates   | S10-S24 |
| 5. References                                | S24     |
| 6. NMR spectra for the synthesized compounds | S25-S93 |



ORTEP (with 50% probability) diagram for the structure **8-Methyl-2-phenyl-3-((1-(*p*-tolyl)vinyl)oxy)imidazo[1,2-*a*]pyridine (4b)**.

|                             |                                                                                                                         |
|-----------------------------|-------------------------------------------------------------------------------------------------------------------------|
| <b>Wavelength</b>           | 0.71073 Å                                                                                                               |
| <b>Formula</b>              | C <sub>23</sub> H <sub>20</sub> N <sub>2</sub> O                                                                        |
| <b>Crystal system</b>       | Triclinic                                                                                                               |
| <b>Space group</b>          | P -1                                                                                                                    |
| <b>Unit cell dimensions</b> | a = 9.5942(6) Å      α = 101.242(3) °<br>b = 9.7522(7) Å      β = 98.692(3) °<br>c = 10.4775(6) Å      γ = 100.998(3) ° |
| <b>Volume</b>               | 925.62(10) Å <sup>3</sup>                                                                                               |
| <b>Z</b>                    | 2                                                                                                                       |
| <b>R-factor (%)</b>         | 9.23                                                                                                                    |

The crystallographic data have been deposited with the Cambridge Crystallographic Data Centres supplementary publication with a CCDC reference number **CCDC 1566643**.

## 1.2. Structure Determination (X-ray crystallographic data for 7b).

The white crystals of **7b** were obtained by crystallization from a solution in dichloromethane/petroleum ether after purification by column chromatography. Chemical Formula:  $C_{18}H_{16}N_2O_3$ .

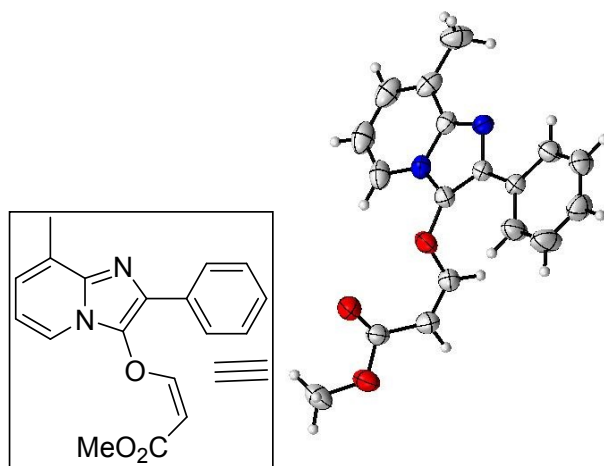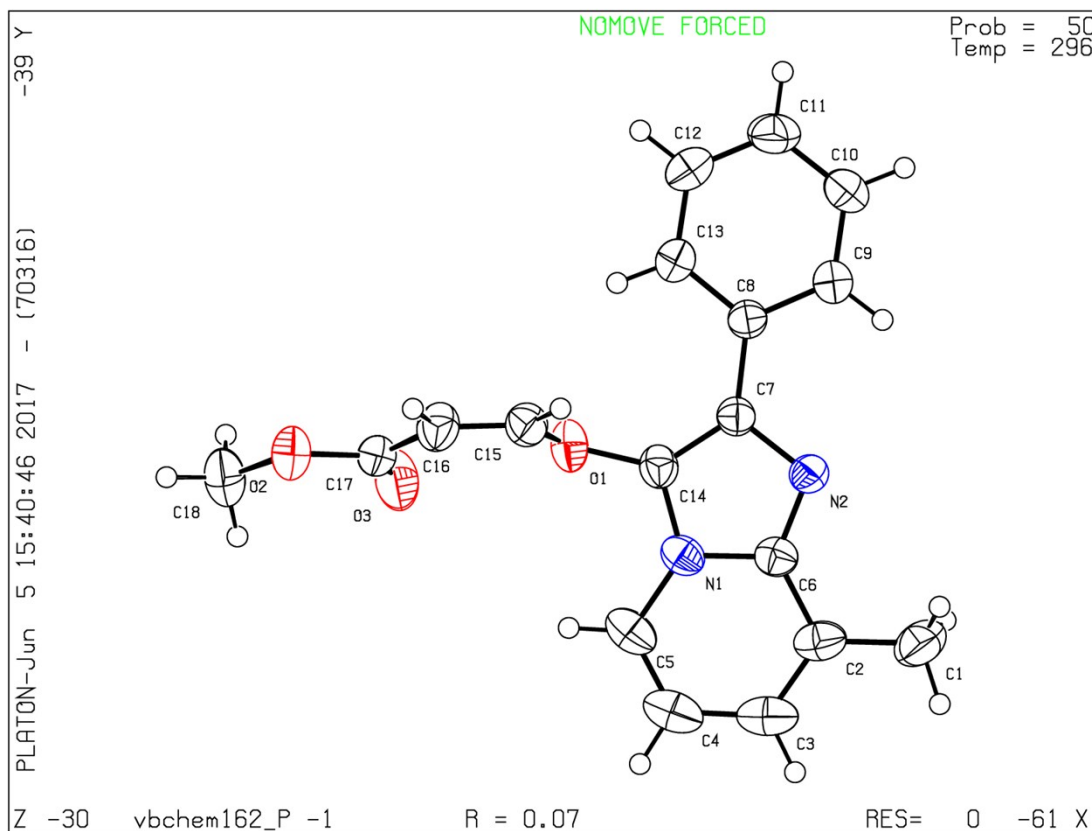

ORTEP (with 50% probability) diagram for the structure **Methyl (Z)-3-((8-methyl-2-phenylimidazo[1,2-a]pyridin-3-yl)oxy)acrylate (7b)**:

|                             |                                                                                                                                          |
|-----------------------------|------------------------------------------------------------------------------------------------------------------------------------------|
| <b>Wavelength</b>           | 0.71073 Å                                                                                                                                |
| <b>Formula</b>              | C18 H16 N2 O3                                                                                                                            |
| <b>Crystal system</b>       | Triclinic                                                                                                                                |
| <b>Space group</b>          | P -1                                                                                                                                     |
| <b>Unit cell dimensions</b> | a = 8.2376(4) Å $\alpha = 98.745(2)^\circ$<br>b = 8.7359(4) Å $\beta = 102.654(2)^\circ$<br>c = 11.8649(6) Å $\gamma = 102.432(2)^\circ$ |
| <b>Volume</b>               | 795.58(7) Å <sup>3</sup>                                                                                                                 |
| <b>Z</b>                    | 2                                                                                                                                        |
| <b>R-factor (%)</b>         | 6.70                                                                                                                                     |

The crystallographic data have been deposited with the Cambridge Crystallographic Data Centres supplementary publication with a CCDC reference number **CCDC 1566644**.

## 2. General information:

All reagents were purchased from commercial sources and used without further purification. <sup>1</sup>H NMR spectra were determined on 400 MHz spectrometer as solutions in CDCl<sub>3</sub>. Chemical shifts are expressed in parts per million ( $\delta$ ) and the signals were reported as s (singlet), d (doublet), t (triplet), m (multiplet), dd (double doublet) and coupling constants (*J*) were given in Hz. <sup>13</sup>C{<sup>1</sup>H} NMR spectra were recorded at 100 MHz in CDCl<sub>3</sub> solution. Chemical shifts as internal standard are referenced to CDCl<sub>3</sub> ( $\delta = 7.26$  for <sup>1</sup>H and  $\delta = 77.16$  for <sup>13</sup>C{<sup>1</sup>H} NMR) as internal standard. TLC was done on silica gel coated glass slide. All solvents were dried and distilled before use. Commercially available solvents were freshly distilled before the reaction. All reactions involving moisture sensitive reactants were executed using oven dried glassware. X-ray single crystal data were collected using MoK $\alpha$  ( $\lambda = 0.71073$  Å) radiation with CCD area detector.

### 3. Experimental procedures:

#### 3.1. Experimental procedure for the synthesis of 4a.

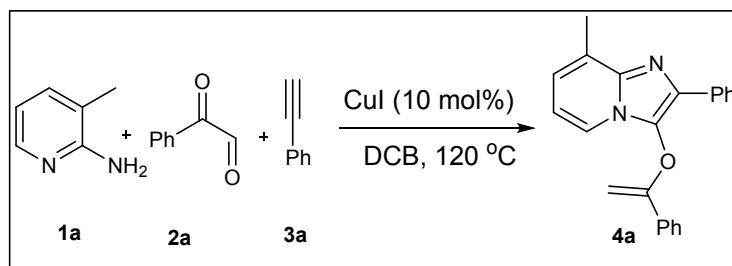

A mixture of 2-amino-3-methylpyridine (**1a**) (0.2 mmol, 22 mg) and phenylglyoxal hydrate (**2a**) (0.21 mmol, 29 mg) were taken in a sealed tube. Then 1,2-dichlorobenzene (2 mL) was added to it and stirred at room temperature for few seconds. Then phenylacetylene (**3a**) (0.22 mmol, 23 mg) and CuI (10 mol%, 3.8 mg) was added to it and stirred at 120 °C for 5 hours under open atmosphere. After completion of the reaction (TLC) the reaction mixture was cooled to room temperature and extracted with dichloromethane. The organic phase was dried over anhydrous Na<sub>2</sub>SO<sub>4</sub>. The crude residue was obtained after evaporation of the solvent in vacuum and purified by column chromatography on silica gel (60–120 mesh) using *n*-hexane/ EtOAc (9:1) as the eluent to afford pure **4a** as a yellow gummy mass (52 mg, 81% yield).

#### 3.2. Synthesis of 4g on 1 mmol scale.

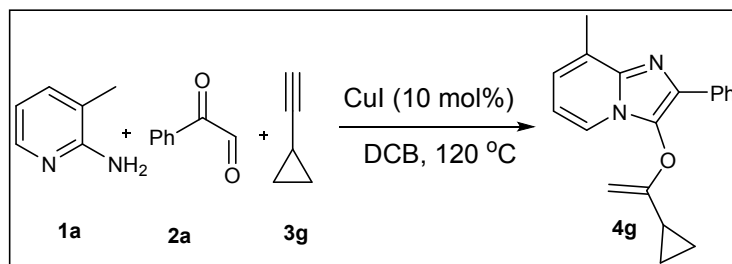

A mixture of 2-amino-3-methylpyridine (**1a**) (1 mmol, 109 mg) and phenylglyoxal hydrate (**2a**) (1.05 mmol, 142 mg) were taken in a sealed tube. Then 1,2-dichlorobenzene (6 mL) was added to it and stirred at room temperature for few seconds. Then ethynylcyclopropane (**3g**) (1.1 mmol, 73 mg) and CuI (10 mol%, 19 mg) was added to it and stirred at 120 °C for 5 hours under open atmosphere. After completion of the reaction (TLC) the reaction mixture was cooled to room temperature and extracted with dichloromethane. The organic phase was dried over

anhydrous Na<sub>2</sub>SO<sub>4</sub>. The crude residue was obtained after evaporation of the solvent in vacuum and purified by column chromatography on silica gel (60–120 mesh) using *n*-hexane/ EtOAc (9:1) as the eluent to afford pure **4g** as a brown oil (275 mg, 95% yield).

### 3.3. Experimental procedure for the synthesis of **5**.

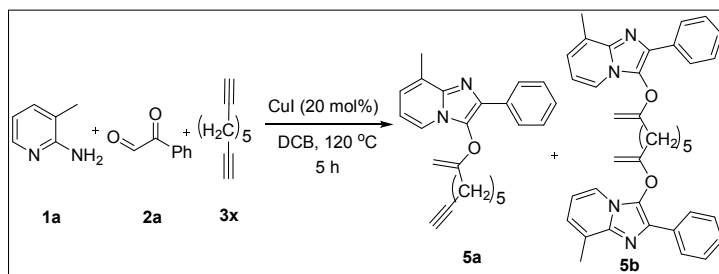

A mixture of 2-amino-3-methylpyridine (**1a**) (0.4 mmol, 44 mg) and phenylglyoxal hydrate (**2a**) (0.42 mmol, 58 mg) were taken in a sealed tube. Then 1,2-dichlorobenzene (4 mL) was added to it and stirred at room temperature for few seconds. Then 1,8-nonadiyne (**3x**) (0.22 mmol, 26 mg) and CuI (20 mol%, 7.6 mg) was added to it and stirred at 120 °C for 5 hours under open atmosphere. After completion of the reaction (TLC) the reaction mixture was cooled to room temperature and extracted with dichloromethane. The organic phase was dried over anhydrous Na<sub>2</sub>SO<sub>4</sub>. The crude residue was obtained after evaporation of the solvent in vacuum and purified by column chromatography on silica gel (60–120 mesh) using *n*-hexane/ EtOAc as the eluent to afford pure **5** as a brown oil.

### 3.4. Experimental procedure for the synthesis of **7a**.

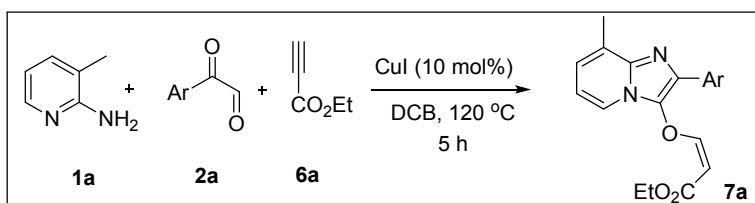

A mixture of 2-amino-3-methylpyridine (**1a**) (0.2 mmol, 22 mg) and phenylglyoxal hydrate (**2a**) (0.21 mmol, 29 mg) were taken in a sealed tube. Then 1,2-dichlorobenzene (2 mL) was added to it and stirred at room temperature for few seconds. Then ethylpropiolate (**6a**) (0.22 mmol, 22 mg) and CuI (10 mol%, 3.8 mg) was added to it and stirred at 120 °C for 5 hours under open atmosphere. After completion of the reaction (TLC) the reaction mixture was cooled to room

temperature and extracted with dichloromethane. The organic phase was dried over anhydrous  $\text{Na}_2\text{SO}_4$ . The crude residue was obtained after evaporation of the solvent in vacuum and purified by column chromatography on silica gel (60–120 mesh) using *n*-hexane/ EtOAc (4:1) as the eluent to afford pure **7a** as a yellow solid (60 mg, 94% yield).

### 3.5. Experimental procedure for the synthesis of **9a**.

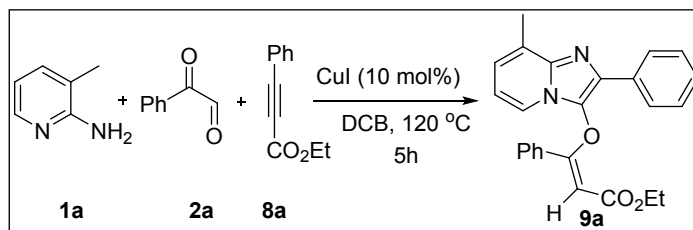

A mixture of 2-amino-3-methylpyridine (**1a**) (0.2 mmol, 22 mg) and phenylglyoxal hydrate (**2a**) (0.21 mmol, 29 mg) were taken in a sealed tube. Then 1,2-dichlorobenzene (2 mL) was added to it and stirred at room temperature for few seconds. Then ethylphenylpropiolate (**8a**) (0.22 mmol, 35 mg) and  $\text{CuI}$  (10 mol%, 3.8 mg) was added to it and stirred at  $120\text{ }^\circ\text{C}$  for 5 hours under open atmosphere. After completion of the reaction (TLC) the reaction mixture was cooled to room temperature and extracted with dichloromethane. The organic phase was dried over anhydrous  $\text{Na}_2\text{SO}_4$ . The crude residue was obtained after evaporation of the solvent in vacuum and purified by column chromatography on silica gel (60–120 mesh) using *n*-hexane/ EtOAc (9:1) as the eluent to afford pure **9a** as a yellow gummy mass (56 mg, 71% yield).

### 3.6. General procedure for the synthesis of **2a**.<sup>1</sup>

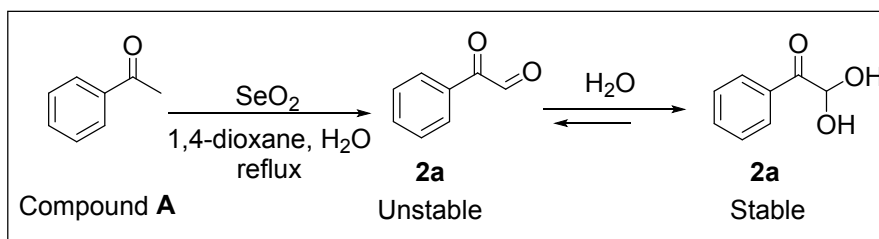

$\text{SeO}_2$  (15 mmol), 1,4-dioxane (9 mL) and water (1 mL) were added to a 100 mL three-necked bottle and fitted it with an condenser. The mixture was heated to  $50\text{--}55\text{ }^\circ\text{C}$  and stirred until the solid dissolved. It was followed by addition of Compound **A** (10 mmol) and the reaction was maintained at reflux temperature. After the reaction was complete, as monitored by TLC, the



mixture was filtered through a pad of celite. The filtrate was evaporated to afford a crude product that was purified by distillation under reduced pressure to give a yellow liquid. This liquid was dissolved in hot water (5 mL) to afford **2a**·H<sub>2</sub>O as a white solid.

White solid (85%, 1.29 g); <sup>1</sup>H NMR (400 MHz, CDCl<sub>3</sub>): δ 8.13-8.11 (m, 2H), 7.69-7.58 (m, 1H), 7.54-7.47 (m, 2H), 5.98 (s, 1H), 4.51 (s, 2H); <sup>13</sup>C NMR (100 MHz): δ 195.0, 189.7, 134.7, 130.6, 130.0, 128.9, 87.3.

### 3.7. General procedure for the synthesis of **10a**.<sup>2</sup>

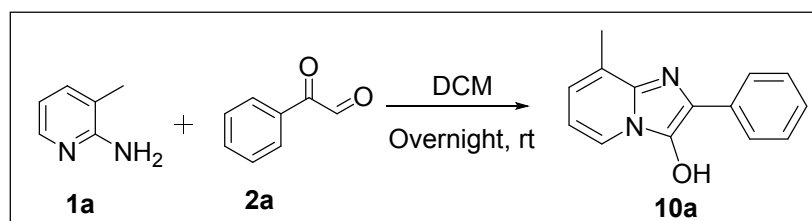

To a solution of 2-amino-3-methylpyridine (**1a**) (108 mg, 1 mmol) in CH<sub>2</sub>Cl<sub>2</sub> (4 mL), phenylglyoxal hydrate (**2a**) (154 mg, 1 mmol) was added portion wise and the reaction mixture was stirred overnight at rt. The reaction mixture was then concentrated under reduced pressure to give 2-phenylimidazo[1,2-*a*]pyridin-3-ol (203 mg, 91%) as a yellowish amorphous powder.

<sup>1</sup>H NMR (400 MHz, DMSO-*d*<sub>6</sub>): δ 8.14-8.12 (m, 3H), 7.35 (t, *J* = 8.0 Hz, 2H), 7.21 (d, *J* = 6.8 Hz, 1H), 7.04 (t, *J* = 7.2 Hz, 1H), 6.96 (t, *J* = 6.8 Hz, 1H), 2.50 (s, 3H).

#### 4. Characterization data for the products:

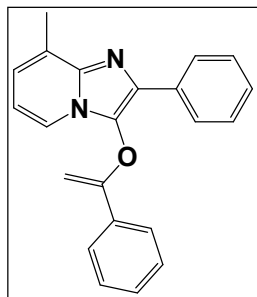

##### **8-Methyl-2-phenyl-3-((1-phenylvinyl)oxy)imidazo[1,2-*a*]pyridine (4a):**

Yellow gummy mass (81%, 52 mg);  $^1\text{H}$  NMR (400 MHz,  $\text{CDCl}_3$ ):  $\delta$  8.11-8.08 (m, 2H), 7.91-7.88 (m, 2H), 7.65 (d,  $J = 6.8$  Hz, 1H), 7.51-7.46 (m, 3H), 7.43-7.39 (m, 2H), 7.31-7.27 (m, 1H), 6.98-6.96 (m, 1H), 6.69 (t,  $J = 7.2$  Hz, 1H), 4.95 (d,  $J = 3.6$  Hz, 1H), 4.17 (d,  $J = 3.6$  Hz, 1H), 2.69 (s, 3H);  $^{13}\text{C}$  NMR (100 MHz):  $\delta$  156.3, 140.4, 133.6, 133.0, 130.7, 130.0, 129.5, 128.75, 128.71, 127.8, 127.6, 126.5, 125.5, 123.0, 119.5, 112.3, 88.0, 16.5; HRMS calcd for  $\text{C}_{22}\text{H}_{19}\text{N}_2\text{O}$   $[\text{M} + \text{H}]^+$ : 327.1492; found  $[\text{M} + \text{H}]^+$ : 327.1494.

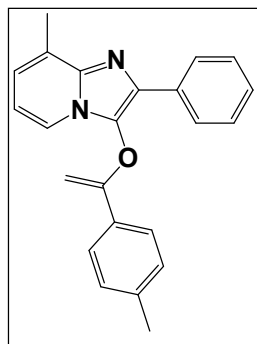

##### **8-Methyl-2-phenyl-3-((1-(*p*-tolyl)vinyl)oxy)imidazo[1,2-*a*]pyridine (4b):**

White solid (85%, 57 mg); m.p.: 148-149 °C.  $^1\text{H}$  NMR (400 MHz,  $\text{CDCl}_3$ ):  $\delta$  8.10-8.07 (m, 2H), 7.78 (d,  $J = 8.4$  Hz, 2H), 7.64 (d,  $J = 6.4$  Hz, 1H), 7.41-7.38 (m, 2H), 7.30-7.26 (m, 3H), 6.97-6.95 (m, 1H), 6.68 (t,  $J = 6.8$  Hz, 1H), 4.89 (d,  $J = 3.6$  Hz, 1H), 4.11 (d,  $J = 3.2$  Hz, 1H), 2.68 (s, 3H), 2.44 (s, 3H);  $^{13}\text{C}$  NMR (100 MHz):  $\delta$  156.4, 140.4, 139.6, 133.1, 130.9, 130.8, 130.1, 129.4, 128.7, 127.9, 127.6, 126.6, 125.4, 122.9, 119.6, 112.2, 87.2, 21.4, 16.5; Anal. Calcd for  $\text{C}_{23}\text{H}_{20}\text{N}_2\text{O}$ : C, 81.15; H, 5.92; N, 8.23%; Found: C, 80.94; H, 5.80; N, 8.09%.

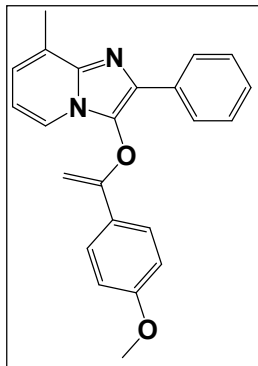

**3-((1-(4-Methoxyphenyl)vinyl)oxy)-8-methyl-2-phenylimidazo[1,2-*a*]pyridine (4c):**

Yellow gummy mass (73%, 51 mg);  $^1\text{H}$  NMR (400 MHz,  $\text{CDCl}_3$ ):  $\delta$  8.08-8.06 (m, 2H), 7.83-7.80 (m, 2H), 7.64 (d,  $J = 6.8$  Hz, 1H), 7.39 (t,  $J = 7.6$  Hz, 2H), 7.28 (d,  $J = 7.2$  Hz, 1H), 7.01-6.95 (m, 3H), 6.68 (t,  $J = 7.2$  Hz, 1H), 4.81 (d,  $J = 4.0$  Hz, 1H), 4.05 (d,  $J = 3.6$  Hz, 1H), 3.88 (s, 3H), 2.67 (s, 3H);  $^{13}\text{C}$  NMR (100 MHz):  $\delta$  160.7, 156.1, 140.4, 133.1, 130.7, 130.1, 128.7, 127.9, 127.5, 126.9, 126.6, 126.3, 123.0, 119.6, 114.1, 112.2, 86.3, 55.5, 16.5; HRMS calcd for  $\text{C}_{23}\text{H}_{21}\text{N}_2\text{O}_2$   $[\text{M} + \text{H}]^+$ : 357.1598; found  $[\text{M} + \text{H}]^+$ : 357.1591.

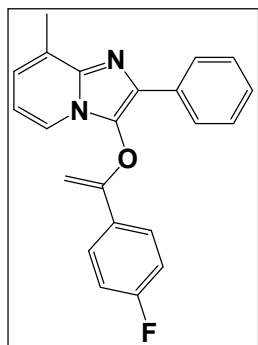

**3-((1-(4-Fluorophenyl)vinyl)oxy)-8-methyl-2-phenylimidazo[1,2-*a*]pyridine (4d):**

Yellow gummy mass (81%, 55 mg);  $^1\text{H}$  NMR (400 MHz,  $\text{CDCl}_3$ ):  $\delta$  8.07-8.05 (m, 2H), 7.87-7.84 (m, 2H), 7.62 (d,  $J = 6.8$  Hz, 1H), 7.42-7.38 (m, 2H), 7.31-7.27 (m, 1H), 7.18-7.14 (m, 2H), 6.98-6.96 (m, 1H), 6.70 (t,  $J = 6.8$  Hz, 1H), 4.87 (d,  $J = 4.0$  Hz, 1H), 4.14 (d,  $J = 3.6$  Hz, 1H), 2.68 (s, 3H);  $^{13}\text{C}$  NMR (100 MHz):  $\delta$  163.6 ( $J_{\text{C-F}} = 248$  Hz), 155.5, 140.4, 133.0, 130.8, 129.9, 129.8 ( $J_{\text{C-F}} = 4$  Hz), 128.7, 127.9, 127.6, 127.4 ( $J_{\text{C-F}} = 8$  Hz), 126.6, 123.0, 119.4, 115.7 ( $J_{\text{C-F}} = 22$  Hz), 112.4, 87.8, 16.5; Anal. Calcd for  $\text{C}_{22}\text{H}_{17}\text{FN}_2\text{O}$ : C, 76.73; H, 4.98; N, 8.13%; Found: C, 76.90; H, 5.04; N, 8.21%.

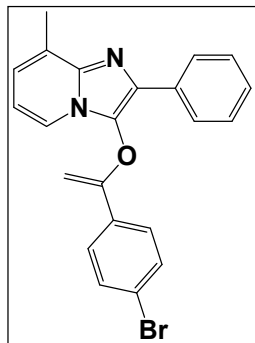

**3-((1-(4-Bromophenyl)vinyl)oxy)-8-methyl-2-phenylimidazo[1,2-a]pyridine (4e):**

Yellow gummy mass (82%, 66 mg);  $^1\text{H}$  NMR (400 MHz,  $\text{CDCl}_3$ ):  $\delta$  8.05-8.02 (m, 2H), 7.76-7.72 (m, 2H), 7.62-7.59 (m, 3H), 7.41-7.37 (m, 2H), 7.30-7.27 (m, 1H), 6.98-6.96 (m, 1H), 6.70 (t,  $J = 6.8$  Hz, 1H), 4.94 (d,  $J = 4.0$  Hz, 1H), 4.18 (d,  $J = 4.0$  Hz, 1H), 2.67 (s, 3H);  $^{13}\text{C}$  NMR (100 MHz):  $\delta$  155.5, 140.4, 132.9, 132.5, 131.9, 130.8, 129.8, 128.7, 128.0, 127.7, 127.0, 126.6, 123.8, 123.1, 119.4, 112.4, 88.6, 16.5; Anal. Calcd for  $\text{C}_{22}\text{H}_{17}\text{BrN}_2\text{O}$ : C, 65.20; H, 4.23; N, 6.91%; Found: C, 65.39; H, 4.31; N, 6.79%.

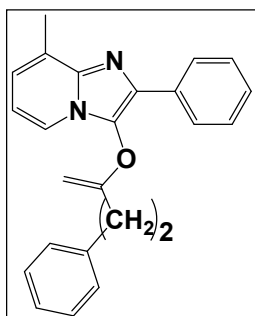

**8-Methyl-2-phenyl-3-((4-phenylbut-1-en-2-yl)oxy)imidazo[1,2-a]pyridine (4f):**

Yellow solid (95%, 67 mg); m.p.: 93-94 °C.  $^1\text{H}$  NMR (400 MHz,  $\text{CDCl}_3$ ):  $\delta$  8.02-8.00 (m, 2H), 7.41-7.37 (m, 3H), 7.32-7.26 (m, 5H), 7.23-7.19 (m, 1H), 6.88-6.86 (m, 1H), 6.58 (t,  $J = 6.8$  Hz, 1H), 4.13 (d,  $J = 3.2$  Hz, 1H), 3.79 (d,  $J = 3.2$  Hz, 1H), 3.06 (t,  $J = 8.0$  Hz, 2H), 2.78-2.74 (m, 2H), 2.61 (s, 3H);  $^{13}\text{C}$  NMR (100 MHz):  $\delta$  159.0, 140.7, 140.2, 133.1, 130.4, 130.1, 128.6, 128.58, 128.51, 127.7, 127.4, 126.6, 126.3, 122.7, 119.5, 112.0, 88.0, 35.0, 33.3, 16.4; Anal. Calcd for  $\text{C}_{24}\text{H}_{22}\text{N}_2\text{O}$ : C, 81.33; H, 6.26; N, 7.90%; Found: C, 81.15; H, 6.35; N, 8.01%.

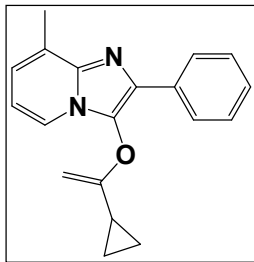

**3-((1-Cyclopropylvinyl)oxy)-8-methyl-2-phenylimidazo[1,2-*a*]pyridine (4g):**

Brown oil (98%, 56 mg);  $^1\text{H NMR}$  (400 MHz,  $\text{CDCl}_3$ ):  $\delta$  7.92-7.90 (m, 2H), 7.43 (d,  $J = 6.8$  Hz, 1H), 7.31 (t,  $J = 8.0$  Hz, 2H), 7.19-7.14 (m, 1H), 6.77-6.75 (m, 1H), 6.52 (t,  $J = 6.8$  Hz, 1H), 4.04 (d,  $J = 2.8$  Hz, 1H), 3.66 (d,  $J = 2.8$  Hz, 1H), 2.51 (s, 3H), 1.64-1.57 (m, 1H), 0.87-0.83 (m, 2H), 0.73-0.70 (m, 2H);  $^{13}\text{C NMR}$  (100 MHz):  $\delta$  159.7, 140.1, 133.0, 130.3, 129.8, 128.5, 127.6, 127.3, 126.5, 122.6, 119.3, 112.0, 85.6, 16.4, 13.6, 5.3; HRMS calcd for  $\text{C}_{19}\text{H}_{19}\text{N}_2\text{O}$   $[\text{M} + \text{H}]^+$ : 291.1492; found  $[\text{M} + \text{H}]^+$ : 291.1493.

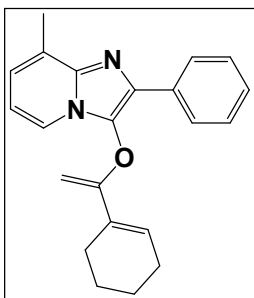

**3-((1-(Cyclohex-1-en-1-yl)vinyl)oxy)-8-methyl-2-phenylimidazo[1,2-*a*]pyridine (4h):**

Brown oil (71%, 46 mg);  $^1\text{H NMR}$  (400 MHz,  $\text{CDCl}_3$ ):  $\delta$  8.06-8.03 (m, 2H), 7.59 (d,  $J = 6.8$  Hz, 1H), 7.43-7.39 (m, 2H), 7.30-7.27 (m, 1H), 6.94-6.92 (m, 1H), 6.72 (t,  $J = 4.4$  Hz, 1H), 6.67 (t,  $J = 6.8$  Hz, 1H), 4.35 (d,  $J = 3.2$  Hz, 1H), 3.90 (d,  $J = 3.2$  Hz, 1H), 2.65 (s, 3H), 2.30-2.24 (m, 4H), 1.80-1.76 (m, 2H), 1.73-1.68 (m, 2H);  $^{13}\text{C NMR}$  (100 MHz):  $\delta$  157.1, 140.4, 133.2, 130.5, 130.1, 128.6, 127.8, 127.4, 127.1, 126.5, 124.3, 122.8, 119.7, 112.0, 86.5, 25.6, 25.2, 22.7, 22.1, 16.5; HRMS calcd for  $\text{C}_{22}\text{H}_{23}\text{N}_2\text{O}$   $[\text{M} + \text{H}]^+$ : 331.1805; found  $[\text{M} + \text{H}]^+$ : 331.1813.

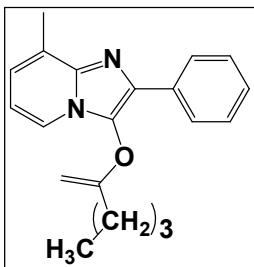

**3-(Hex-1-en-2-yloxy)-8-methyl-2-phenylimidazo[1,2-a]pyridine (4i):**

Yellow solid (96%, 58 mg); m.p.: 57-58 °C. <sup>1</sup>H NMR (400 MHz, CDCl<sub>3</sub>): δ 8.01 (d, *J* = 7.2 Hz, 2H), 7.54 (d, *J* = 6.8 Hz, 1H), 7.39 (t, *J* = 8.0 Hz, 2H), 7.28-7.24 (m, 1H), 6.87 (d, *J* = 6.8 Hz, 1H), 6.63 (t, *J* = 6.8 Hz, 1H), 4.07 (d, *J* = 3.2 Hz, 1H), 3.75 (d, *J* = 2.8 Hz, 1H), 2.61 (s, 3H), 2.41 (t, *J* = 8.0 Hz, 2H), 1.75-1.68 (m, 2H), 1.50-1.41 (m, 2H), 0.97 (t, *J* = 7.6 Hz, 3H); <sup>13</sup>C NMR (100 MHz): δ 159.9, 140.1, 133.1, 130.3, 130.2, 128.5, 127.7, 127.4, 126.6, 122.7, 119.4, 112.0, 87.1, 33.2, 29.2, 22.3, 16.4, 13.9; Anal. Calcd for C<sub>20</sub>H<sub>22</sub>N<sub>2</sub>O: C, 78.40; H, 7.24; N, 9.14%; Found: C, 78.20; H, 7.36; N, 9.21%.

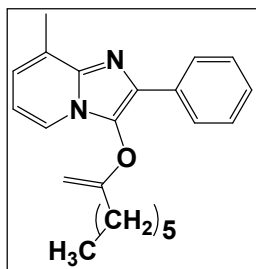

**8-Methyl-3-(oct-1-en-2-yloxy)-2-phenylimidazo[1,2-a]pyridine (4j):**

Yellow solid (97%, 64 mg); m.p.: 52-53 °C. <sup>1</sup>H NMR (400 MHz, CDCl<sub>3</sub>): δ 8.02-8.00 (m, 2H), 7.52 (d, *J* = 6.8 Hz, 1H), 7.38 (t, *J* = 7.6 Hz, 2H), 7.26-7.22 (m, 1H), 6.84 (d, *J* = 6.8 Hz, 1H), 6.60 (t, *J* = 6.8 Hz, 1H), 4.06 (d, *J* = 3.2 Hz, 1H), 3.74 (d, *J* = 2.8 Hz, 1H), 2.59 (s, 3H), 2.39 (t, *J* = 8.0 Hz, 2H), 1.75-1.67 (m, 2H), 1.43-1.39 (m, 2H), 1.34-1.30 (m, 4H), 0.91-0.87 (m, 3H); <sup>13</sup>C NMR (100 MHz): δ 159.9, 140.1, 133.2, 130.3, 130.2, 128.4, 127.6, 127.3, 126.6, 122.6, 119.4, 111.9, 87.1, 33.5, 31.7, 28.9, 27.0, 22.6, 16.4, 14.1; Anal. Calcd for C<sub>22</sub>H<sub>26</sub>N<sub>2</sub>O: C, 79.00; H, 7.84; N, 8.38%; Found: C, 79.19; H, 7.74; N, 8.49%.

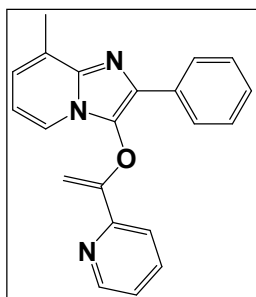

**8-Methyl-2-phenyl-3-((1-(pyridin-2-yl)vinyl)oxy)imidazo[1,2-a]pyridine (4k):**

Brown gummy mass (75%, 49 mg); <sup>1</sup>H NMR (400 MHz, CDCl<sub>3</sub>): δ 8.70-8.69 (m, 1H), 8.07-8.05 (m, 2H), 8.00 (d, *J* = 8.0 Hz, 1H), 7.87-7.82 (m, 1H), 7.66 (d, *J* = 6.8 Hz, 1H), 7.41-7.34 (m, 3H), 7.29-7.26 (m, 1H), 6.98-6.96 (m, 1H), 6.69 (t, *J* = 6.8 Hz, 1H), 5.68 (d, *J* = 3.2 Hz, 1H),

4.33 (d,  $J = 3.2$  Hz, 1H), 2.68 (s, 3H);  $^{13}\text{C}$  NMR (100 MHz):  $\delta$  155.4, 151.3, 149.8, 140.4, 137.1, 132.9, 130.7, 129.9, 128.7, 128.3, 127.9, 127.6, 126.6, 124.0, 123.1, 119.6, 112.3, 91.2, 16.5; Anal. Calcd for  $\text{C}_{21}\text{H}_{17}\text{N}_3\text{O}$ : C, 77.04; H, 5.23; N, 12.84%; Found: C, 77.21; H, 5.30; N, 12.72%.

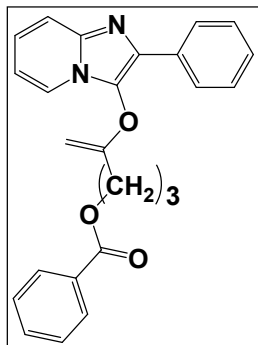

**4-((2-Phenylimidazo[1,2-*a*]pyridin-3-yl)oxy)pent-4-en-1-yl benzoate (4l):**

Brown oil (87%, 69 mg);  $^1\text{H}$  NMR (400 MHz,  $\text{CDCl}_3$ ):  $\delta$  8.08-8.06 (m, 2H), 8.02-7.99 (m, 2H), 7.74-7.72 (m, 1H), 7.59-7.54 (m, 2H), 7.46-7.41 (m, 4H), 7.32-7.28 (m, 1H), 7.16-7.11 (m, 1H), 6.79-6.76 (m, 1H), 4.49 (t,  $J = 6.4$  Hz, 2H), 4.20 (d,  $J = 3.2$  Hz, 1H), 3.86 (d,  $J = 3.2$  Hz, 1H), 2.63 (t,  $J = 8.0$  Hz, 2H), 2.28-2.21 (m, 2H);  $^{13}\text{C}$  NMR (100 MHz):  $\delta$  166.7, 158.7, 139.9, 133.1, 132.8, 130.9, 130.3, 129.77, 129.72, 128.7, 128.5, 127.8, 126.6, 124.2, 121.6, 117.9, 112.3, 88.2, 64.1, 30.3, 26.4; Anal. Calcd for  $\text{C}_{25}\text{H}_{22}\text{N}_2\text{O}_3$ : C, 75.36; H, 5.57; N, 7.03%; Found: C, 75.13; H, 5.66; N, 7.11%.

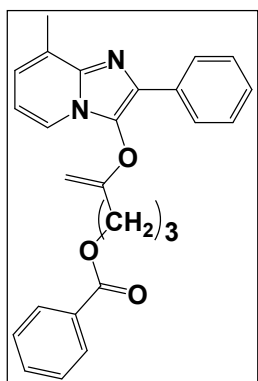

**4-((8-Methyl-2-phenylimidazo[1,2-*a*]pyridin-3-yl)oxy)pent-4-en-1-yl benzoate (4m):**

Brown oil (91%, 74 mg);  $^1\text{H}$  NMR (400 MHz,  $\text{CDCl}_3$ ):  $\delta$  8.03-7.98 (m, 4H), 7.53 (d,  $J = 6.8$  Hz, 1H), 7.50-7.46 (m, 1H), 7.39-7.35 (m, 4H), 7.25-7.21 (m, 1H), 6.85-6.83 (m, 1H), 6.60 (t,  $J = 6.8$  Hz, 1H), 4.41 (t,  $J = 6.4$  Hz, 2H), 4.12 (d,  $J = 3.2$  Hz, 1H), 3.80 (d,  $J = 2.8$  Hz, 1H), 2.58 (s, 3H), 2.55 (t,  $J = 8.0$  Hz, 2H), 2.21-2.14 (m, 2H);  $^{13}\text{C}$  NMR (100 MHz):  $\delta$  166.4, 158.6, 140.1, 133.0, 132.9, 130.2, 130.1, 129.8, 129.5, 128.4, 128.3, 127.6, 127.4, 126.5, 122.7, 119.3, 112.1, 87.9,

63.9, 30.1, 26.2, 16.3; HRMS calcd for C<sub>26</sub>H<sub>25</sub>N<sub>2</sub>O<sub>3</sub> [M +H]<sup>+</sup>: 413.1860; found [M +H]<sup>+</sup>: 413.1867.

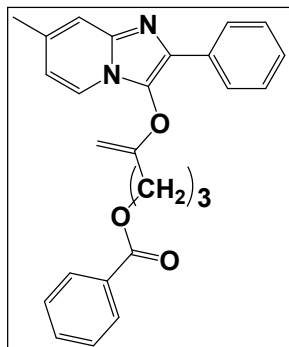

**4-((7-Methyl-2-phenylimidazo[1,2-*a*]pyridin-3-yl)oxy)pent-4-en-1-yl benzoate (4n):**

Yellow gummy mass (89%, 73 mg); <sup>1</sup>H NMR (400 MHz, CDCl<sub>3</sub>): δ 8.09-8.06 (m, 2H), 7.99-7.97 (m, 2H), 7.63 (d, *J* = 6.8 Hz, 1H), 7.59-7.55 (m, 1H), 7.47-7.40 (m, 4H), 7.33 (s, 1H), 7.31-7.26 (m, 1H), 6.63-6.61 (m, 1H), 4.49 (t, *J* = 6.8 Hz, 2H), 4.20 (d, *J* = 3.2 Hz, 1H), 3.87 (d, *J* = 2.8 Hz, 1H), 2.63 (t, *J* = 8.0 Hz, 2H), 2.39 (s, 3H), 2.29-2.22 (m, 2H); <sup>13</sup>C NMR (100 MHz): δ 166.7, 158.8, 140.4, 135.1, 133.1, 133.0, 130.4, 130.3, 129.7, 129.4, 128.6, 128.5, 127.6, 126.5, 120.9, 116.2, 114.9, 88.1, 64.1, 30.3, 26.4, 21.5; Anal. Calcd for C<sub>26</sub>H<sub>24</sub>N<sub>2</sub>O<sub>3</sub>: C, 75.71; H, 5.86; N, 6.79%; Found: C, 75.50; H, 5.79; N, 6.88%.

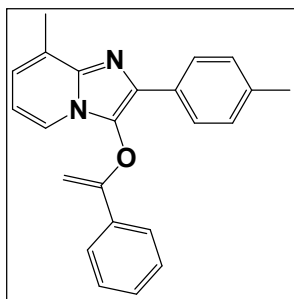

**8-Methyl-3-((1-phenylvinyl)oxy)-2-(*p*-tolyl)imidazo[1,2-*a*]pyridine (4o):**

Brown gummy mass (84%, 57 mg); <sup>1</sup>H NMR (400 MHz, CDCl<sub>3</sub>): δ 7.95 (d, *J* = 8.4 Hz, 2H), 7.85-7.83 (m, 2H), 7.58 (d, *J* = 6.8 Hz, 1H), 7.45-7.40 (m, 3H), 7.17 (d, *J* = 8.0 Hz, 2H), 6.90-6.88 (m, 1H), 6.60 (t, *J* = 6.8 Hz, 1H), 4.88 (d, *J* = 3.6 Hz, 1H), 4.10 (d, *J* = 3.6 Hz, 1H), 2.64 (s, 3H), 2.31 (s, 3H); <sup>13</sup>C NMR (100 MHz): δ 156.2, 140.2, 137.2, 133.6, 130.8, 130.1, 129.6, 129.4, 129.3, 128.6, 127.6, 126.4, 125.4, 122.8, 119.3, 112.1, 87.9, 21.3, 16.5; Anal. Calcd for C<sub>23</sub>H<sub>20</sub>N<sub>2</sub>O: C, 81.15; H, 5.92; N, 8.23%; Found: C, 80.97; H, 5.81; N, 8.36%.



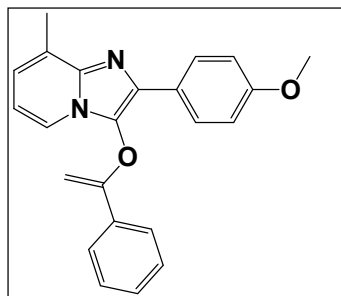

**2-(4-Methoxyphenyl)-8-methyl-3-((1-phenylvinyl)oxy)imidazo[1,2-*a*]pyridine (4p):**

Brown gummy mass (81%, 57 mg); <sup>1</sup>H NMR (400 MHz, CDCl<sub>3</sub>): δ 8.01 (d, *J* = 8.8 Hz, 2H), 7.89-7.87 (m, 2H), 7.63 (d, *J* = 6.8 Hz, 1H), 7.50-7.45 (m, 3H), 6.96-6.93 (m, 3H), 6.67 (t, *J* = 6.8 Hz, 1H), 4.94 (d, *J* = 3.6 Hz, 1H), 4.15 (d, *J* = 3.6 Hz, 1H), 3.81 (s, 3H), 2.67 (s, 3H); <sup>13</sup>C NMR (100 MHz): δ 159.2, 156.3, 140.3, 133.7, 130.8, 129.5, 129.2, 128.7, 127.9, 127.6, 125.8, 125.5, 122.9, 119.4, 114.1, 112.1, 88.0, 55.3, 16.5; HRMS calcd for C<sub>23</sub>H<sub>21</sub>N<sub>2</sub>O<sub>2</sub> [M +H]<sup>+</sup>: 357.1598; found [M +H]<sup>+</sup>: 357.1593.

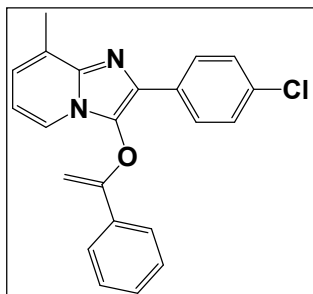

**2-(4-Chlorophenyl)-8-methyl-3-((1-phenylvinyl)oxy)imidazo[1,2-*a*]pyridine (4q):**

Brown gummy mass (91%, 65 mg); <sup>1</sup>H NMR (400 MHz, CDCl<sub>3</sub>): δ 8.04-8.00 (m, 2H), 7.89-7.86 (m, 2H), 7.63 (d, *J* = 6.8 Hz, 1H), 7.51-7.46 (m, 3H), 7.38-7.35 (m, 2H), 6.98-6.96 (m, 1H), 6.69 (t, *J* = 6.8 Hz, 1H), 4.95 (d, *J* = 4.0 Hz, 1H), 4.14 (d, *J* = 3.6 Hz, 1H), 2.67 (s, 3H); <sup>13</sup>C NMR (100 MHz): δ 156.2, 140.4, 133.4, 133.3, 131.6, 130.1, 129.7, 129.6, 128.88, 128.80, 127.9, 127.8, 125.4, 123.2, 119.5, 112.4, 88.1, 16.5; Anal. Calcd for C<sub>22</sub>H<sub>17</sub>ClN<sub>2</sub>O: C, 73.23; H, 4.75; N, 7.76%; Found: C, 73.05; H, 7.66; N, 7.63%.

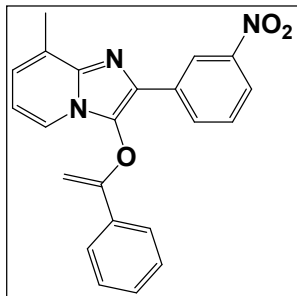

**8-Methyl-2-(3-nitrophenyl)-3-((1-phenylvinyl)oxy)imidazo[1,2-*a*]pyridine (4r):**

Yellow solid (86%, 63 mg); m.p.: 155-156 °C. <sup>1</sup>H NMR (400 MHz, CDCl<sub>3</sub>): δ 8.96 (t, *J* = 2.0 Hz, 1H), 8.35 (d, *J* = 8.0 Hz, 1H), 8.10-8.08 (m, 1H), 7.89-7.87 (m, 2H), 7.67 (d, *J* = 6.8 Hz, 1H), 7.54-7.46 (m, 4H), 7.01 (d, *J* = 6.8 Hz, 1H), 6.73 (t, *J* = 6.8 Hz, 1H), 4.95 (d, *J* = 3.6 Hz, 1H), 4.12 (d, *J* = 3.6 Hz, 1H), 2.67 (s, 3H); <sup>13</sup>C NMR (100 MHz): δ 156.6, 148.7, 140.6, 134.9, 133.2, 132.0, 130.8, 129.8, 129.5, 128.8, 128.4, 128.2, 125.5, 123.6, 122.0, 121.4, 119.6, 112.8, 88.2, 16.4; HRMS calcd for C<sub>22</sub>H<sub>18</sub>N<sub>3</sub>O<sub>3</sub> [M +H]<sup>+</sup>: 372.1343; found [M +H]<sup>+</sup>: 372.1346.

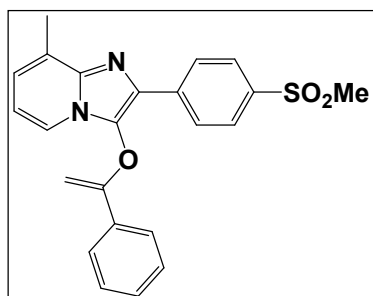

**8-Methyl-2-(4-(methylsulfonyl)phenyl)-3-((1-phenylvinyl)oxy)imidazo[1,2-*a*]pyridine (4s):**

Brown solid (83%, 67 mg); m.p.: 184-185 °C. <sup>1</sup>H NMR (400 MHz, CDCl<sub>3</sub>): δ 8.25 (d, *J* = 8.4 Hz, 2H), 7.93 (d, *J* = 8.4 Hz, 2H), 7.87-7.85 (m, 2H), 7.65 (d, *J* = 6.4 Hz, 1H), 7.50-7.47 (m, 3H), 7.00 (d, *J* = 6.8 Hz, 1H), 6.72 (t, *J* = 6.8 Hz, 1H), 4.96 (d, *J* = 4.0 Hz, 1H), 4.12 (d, *J* = 4.0 Hz, 1H), 3.03 (s, 3H), 2.66 (s, 3H); <sup>13</sup>C NMR (100 MHz): δ 156.3, 140.7, 138.7, 138.5, 133.1, 131.3, 129.8, 128.8, 128.7, 128.2, 127.7, 127.0, 125.3, 123.7, 119.6, 112.9, 88.2, 44.6, 16.4; HRMS calcd for C<sub>23</sub>H<sub>21</sub>N<sub>2</sub>O<sub>3</sub>S [M +H]<sup>+</sup>: 405.1267; found [M +H]<sup>+</sup>: 405.1273.

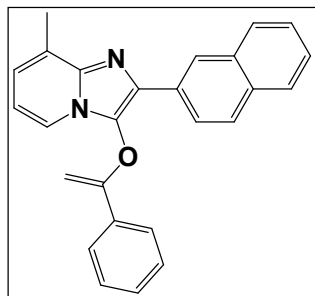

**8-Methyl-2-(naphthalen-2-yl)-3-((1-phenylvinyl)oxy)imidazo[1,2-*a*]pyridine (4t):**

Brown gummy mass (88%, 66 mg);  $^1\text{H}$  NMR (400 MHz,  $\text{CDCl}_3$ ):  $\delta$  8.60 (s, 1H), 8.27-8.24 (m, 1H), 7.95-7.93 (m, 2H), 7.89-7.80 (m, 3H), 7.69 (d,  $J = 6.4$  Hz, 1H), 7.54-7.42 (m, 5H), 7.00-6.98 (m, 1H), 6.70 (t,  $J = 6.8$  Hz, 1H), 4.97 (d,  $J = 3.6$  Hz, 1H), 4.21 (d,  $J = 3.6$  Hz, 1H), 2.74 (s, 3H);  $^{13}\text{C}$  NMR (100 MHz):  $\delta$  156.4, 140.5, 133.73, 133.70, 132.9, 130.7, 130.6, 130.5, 130.4, 129.6, 128.7, 128.5, 128.2, 127.8, 127.7, 126.0, 125.9, 125.5, 124.6, 123.1, 119.5, 112.3, 88.2, 16.6; HRMS calcd for  $\text{C}_{26}\text{H}_{21}\text{N}_2\text{O}$   $[\text{M} + \text{H}]^+$ : 377.1648; found  $[\text{M} + \text{H}]^+$ : 377.1676.

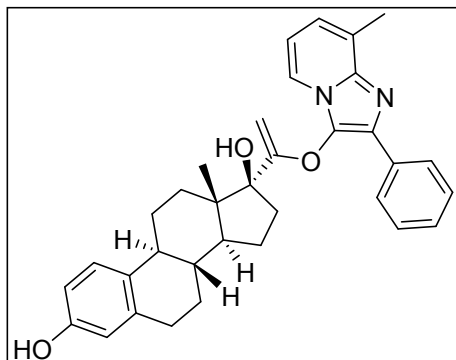

**(8R,9S,13S,14S,17S)-13-Methyl-17-(1-((8-methyl-2-phenylimidazo[1,2-*a*]pyridin-3-yl)oxy)vinyl)-7,8,9,11,12,13,14,15,16,17-decahydro-6H-cyclopenta[*a*]phenanthrene-3,17-diol (4u):** White gummy mass (72%, 74 mg);  $^1\text{H}$  NMR (400 MHz,  $\text{CDCl}_3$ ):  $\delta$  8.01 (d,  $J = 7.2$  Hz, 2H), 7.86 (d,  $J = 6.8$  Hz, 1H), 7.40 (t,  $J = 8.0$  Hz, 2H), 7.30 (t,  $J = 7.2$  Hz, 1H), 7.15 (d,  $J = 8.8$  Hz, 1H), 6.98 (d,  $J = 6.8$  Hz, 1H), 6.73 (t,  $J = 6.8$  Hz, 1H), 6.65-6.63 (m, 1H), 6.55 (d,  $J = 2.4$  Hz, 1H), 4.42 (d,  $J = 4.0$  Hz, 1H), 4.23 (d,  $J = 3.6$  Hz, 1H), 2.92 (s, 1H), 2.83-2.76 (m, 2H), 2.65 (s, 3H), 2.34-2.26 (m, 2H), 2.19-2.11 (m, 2H), 1.91-1.85 (m, 2H), 1.75-1.69 (m, 3H), 1.55-1.49 (m, 2H), 1.36-1.25 (m, 2H), 1.04 (s, 3H);  $^{13}\text{C}$  NMR (100 MHz):  $\delta$  162.7, 153.8, 140.5, 138.3, 132.7, 132.3, 131.6, 129.6, 128.5, 127.9, 127.6, 126.5, 123.3, 120.1, 115.5, 112.9, 112.5, 91.2, 86.0, 48.8, 47.7, 43.7, 39.6, 36.1, 34.2, 29.7, 27.5, 26.6, 23.0, 16.6, 14.6; HRMS calcd for  $\text{C}_{34}\text{H}_{37}\text{N}_2\text{O}_3$   $[\text{M} + \text{H}]^+$ : 521.2799; found  $[\text{M} + \text{H}]^+$ : 521.2797.

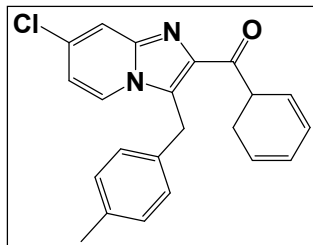

**(7-Chloro-3-(4-methylbenzyl)imidazo[1,2-*a*]pyridin-2-yl)(cyclohexa-2,4-dien-1-yl)methanone (4v)**: White solid (83%, 60 mg); m.p.: 165-166 °C. <sup>1</sup>H NMR (400 MHz, CDCl<sub>3</sub>): δ 8.29-8.27 (m, 2H), 8.04-8.03 (m, 1H), 7.60-7.56 (m, 2H), 7.52-7.48 (m, 2H), 7.28-7.25 (m, 1H), 7.14-7.08 (m, 4H), 4.66 (s, 2H), 2.30 (s, 3H); <sup>13</sup>C NMR (100 MHz): δ 190.8, 142.0, 140.6, 138.0, 136.7, 133.0, 132.7, 130.9, 129.7, 129.2, 128.8, 128.2, 128.1, 123.9, 119.9, 108.7, 29.4, 21.1; Anal. Calcd for C<sub>22</sub>H<sub>19</sub>ClN<sub>2</sub>O: C, 72.82; H, 5.28; N, 7.72%; Found: C, 73.00; H, 5.19; N, 7.59%.

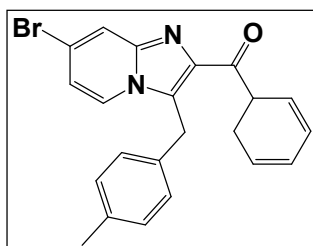

**(7-Bromo-3-(4-methylbenzyl)imidazo[1,2-*a*]pyridin-2-yl)(cyclohexa-2,4-dien-1-yl)methanone (4w)**: White solid (82%, 66 mg); m.p.: 161-162 °C. <sup>1</sup>H NMR (400 MHz, CDCl<sub>3</sub>): δ 8.29-8.27 (m, 2H), 7.93 (d, *J* = 1.6 Hz, 1H), 7.64-7.57 (m, 2H), 7.53-7.49 (m, 2H), 7.20-7.17 (m, 1H), 7.14-7.08 (m, 4H), 4.66 (s, 2H), 2.30 (s, 3H); <sup>13</sup>C NMR (100 MHz): δ 190.8, 141.9, 140.8, 138.1, 136.7, 133.0, 132.8, 130.9, 129.7, 129.0, 128.3, 128.1, 127.2, 122.1, 121.7, 119.7, 29.4, 21.1; Anal. Calcd for C<sub>22</sub>H<sub>19</sub>BrN<sub>2</sub>O: C, 64.87; H, 4.70; N, 6.88%; Found: C, 64.65; H, 4.81; N, 7.00%.

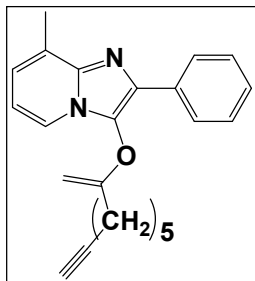

**8-Methyl-3-(non-1-en-8-yn-2-yloxy)-2-phenylimidazo[1,2-*a*]pyridine (5a):**

Brown oil (44%, 30 mg);  $^1\text{H}$  NMR (400 MHz,  $\text{CDCl}_3$ ):  $\delta$  8.03-8.01 (m, 2H), 7.59 (d,  $J = 6.4$  Hz, 1H), 7.44-7.41 (m, 2H), 7.31-7.27 (m, 1H), 6.95-6.93 (m, 1H), 6.69 (t,  $J = 6.8$  Hz, 1H), 4.13 (d,  $J = 3.2$  Hz, 1H), 3.80 (d,  $J = 2.8$  Hz, 1H), 2.65 (s, 3H), 2.46 (t,  $J = 8.0$  Hz, 2H), 2.27-2.23 (m, 2H), 1.97 (t,  $J = 2.8$  Hz, 1H), 1.83-1.76 (m, 2H), 1.66-1.56 (m, 4H);  $^{13}\text{C}$  NMR (100 MHz):  $\delta$  159.8, 140.2, 133.2, 130.4, 130.2, 128.5, 127.8, 127.5, 126.7, 122.7, 119.5, 112.1, 87.4, 84.5, 68.5, 33.5, 28.3, 26.6, 18.5, 16.5; HRMS calcd for  $\text{C}_{23}\text{H}_{25}\text{N}_2\text{O}$   $[\text{M} + \text{H}]^+$ : 345.1961; found  $[\text{M} + \text{H}]^+$ : 345.1965.

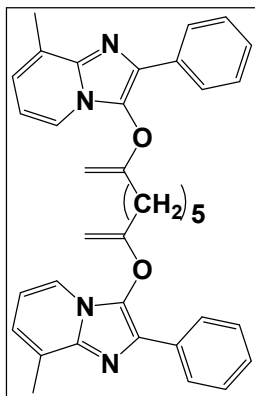

**3,3'-(Nona-1,8-diene-2,8-diylbis(oxy))bis(8-methyl-2-phenylimidazo[1,2-*a*]pyridine) (5b):**

Brown oil (26%, 30 mg);  $^1\text{H}$  NMR (400 MHz,  $\text{CDCl}_3$ ):  $\delta$  8.06-8.04 (m, 4H), 7.60 (d,  $J = 6.8$  Hz, 2H), 7.44 (t,  $J = 7.6$  Hz, 4H), 7.29 (t,  $J = 7.6$  Hz, 2H), 6.94-6.92 (m, 2H), 6.67 (t,  $J = 6.8$  Hz, 2H), 4.16 (d,  $J = 2.8$  Hz, 2H), 3.84 (d,  $J = 2.8$  Hz, 2H), 2.65 (s, 6H), 2.51 (t,  $J = 8.0$  Hz, 4H), 1.92-1.84 (m, 4H), 1.70-1.60 (m, 2H);  $^{13}\text{C}$  NMR (100 MHz):  $\delta$  159.8, 140.3, 133.2, 130.4, 130.2, 128.6, 127.9, 127.5, 126.7, 122.8, 119.5, 112.1, 87.5, 33.6, 28.8, 27.0, 16.5; HRMS calcd for  $\text{C}_{37}\text{H}_{37}\text{N}_4\text{O}_2$   $[\text{M} + \text{H}]^+$ : 569.2911; found  $[\text{M} + \text{H}]^+$ : 569.2920.

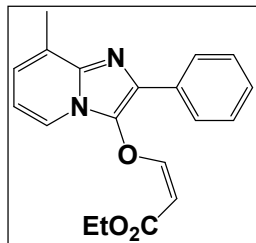

**Ethyl (Z)-3-((8-methyl-2-phenylimidazo[1,2-a]pyridin-3-yl)oxy)acrylate (7a):**

Yellow solid (94%, 60 mg); m.p.: 97-98 °C. <sup>1</sup>H NMR (400 MHz, CDCl<sub>3</sub>): δ 7.98 (d, *J* = 7.2 Hz, 2H), 7.84 (d, *J* = 6.8 Hz, 1H), 7.39 (t, *J* = 7.6 Hz, 2H), 7.28-7.25 (m, 1H), 6.92 (d, *J* = 6.8 Hz, 1H), 6.70 (t, *J* = 6.8 Hz, 1H), 6.51 (d, *J* = 6.8 Hz, 1H), 5.22 (d, *J* = 6.8 Hz, 1H), 4.27 (q, *J* = 14.0 Hz, *J* = 7.2 Hz, 2H), 2.58 (s, 3H), 1.33 (t, *J* = 7.2 Hz, 3H); <sup>13</sup>C NMR (100 MHz): δ 164.0, 155.7, 139.6, 133.3, 132.2, 128.7, 127.7, 127.6, 126.9, 123.2, 119.2, 112.6, 102.5, 60.3, 16.3, 14.3; Anal. Calcd for C<sub>19</sub>H<sub>18</sub>N<sub>2</sub>O<sub>3</sub>: C, 70.79; H, 5.63; N, 8.69%; Found: C, 70.98; H, 5.55; N, 8.81%.

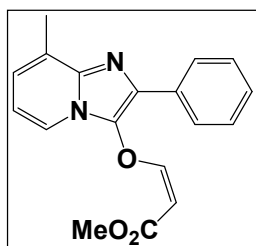

**Methyl (Z)-3-((8-methyl-2-phenylimidazo[1,2-a]pyridin-3-yl)oxy)acrylate (7b):**

White solid (93%, 57 mg); m.p.: 94-95 °C. <sup>1</sup>H NMR (400 MHz, CDCl<sub>3</sub>): δ 8.00-7.97 (m, 2H), 7.85 (d, *J* = 6.4 Hz, 1H), 7.43-7.39 (m, 2H), 7.31-7.27 (m, 1H), 6.95-6.93 (m, 1H), 6.72 (t, *J* = 6.8 Hz, 1H), 6.54 (d, *J* = 6.8 Hz, 1H), 5.24 (d, *J* = 6.8 Hz, 1H), 3.82 (s, 3H), 2.60 (s, 3H); <sup>13</sup>C NMR (100 MHz): δ 164.5, 156.0, 139.7, 133.3, 132.2, 128.7, 127.8, 127.7, 127.0, 123.3, 119.2, 112.7, 102.0, 51.5, 16.4; HRMS calcd for C<sub>18</sub>H<sub>17</sub>N<sub>2</sub>O<sub>3</sub> [M +H]<sup>+</sup>: 309.1234; found [M +H]<sup>+</sup>: 309.1242.

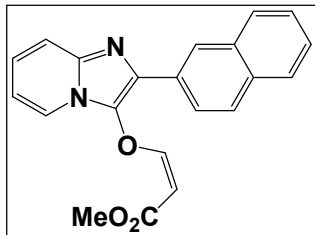

**Methyl (Z)-3-((2-(naphthalen-2-yl)imidazo[1,2-a]pyridin-3-yl)oxy)acrylate (7c):**

Brown gummy mass (68%, 46 mg);  $^1\text{H}$  NMR (400 MHz,  $\text{CDCl}_3$ ):  $\delta$  8.51 (s, 1H), 8.14-8.11 (m, 1H), 8.08-8.06 (m, 1H), 7.93-7.89 (m, 2H), 7.85-7.83 (m, 1H), 7.63 (d,  $J = 9.2$  Hz, 1H), 7.50-7.47 (m, 2H), 7.25-7.21 (m, 1H), 6.91-6.87 (m, 1H), 6.61 (d,  $J = 6.8$  Hz, 1H), 5.31 (d,  $J = 6.8$  Hz, 1H), 3.89 (s, 3H);  $^{13}\text{C}$  NMR (100 MHz):  $\delta$  164.6, 155.9, 139.7, 133.7, 133.4, 133.1, 129.3, 128.6, 128.5, 127.8, 126.48, 126.43, 126.3, 124.9, 124.7, 121.6, 117.9, 112.9, 102.6, 51.7; Anal. Calcd for  $\text{C}_{21}\text{H}_{16}\text{N}_2\text{O}_3$ : C, 73.24; H, 4.68; N, 8.13%; Found: C, 73.45; H, 4.77; N, 8.02%.

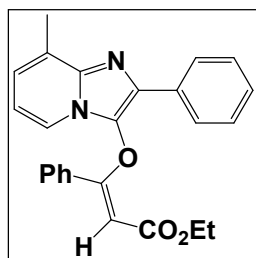

**Ethyl (Z)-3-((8-methyl-2-phenylimidazo[1,2-a]pyridin-3-yl)oxy)-3-phenylacrylate (9a):**

Yellow gummy mass (71%, 56 mg);  $^1\text{H}$  NMR (400 MHz,  $\text{CDCl}_3$ ):  $\delta$  7.98 (d,  $J = 6.8$  Hz, 1H), 7.86 (d,  $J = 7.6$  Hz, 2H), 7.40 (t,  $J = 7.6$  Hz, 2H), 7.31 (t,  $J = 7.6$  Hz, 1H), 7.19-7.16 (m, 1H), 7.04-6.99 (m, 4H), 6.89 (d,  $J = 6.8$  Hz, 1H), 6.74 (t,  $J = 6.8$  Hz, 1H), 5.55 (s, 1H), 4.23 (q,  $J = 14.4$  Hz,  $J = 7.2$  Hz, 2H), 2.53 (s, 3H), 1.30 (t,  $J = 7.2$  Hz, 3H);  $^{13}\text{C}$  NMR (100 MHz):  $\delta$  164.5, 163.5, 132.9, 132.8, 130.5, 130.2, 128.5, 128.25, 128.22, 127.7, 127.69, 127.65, 127.60, 127.1, 122.6, 119.3, 112.5, 103.3, 60.5, 16.5, 14.4; Anal. Calcd for  $\text{C}_{25}\text{H}_{22}\text{N}_2\text{O}_3$ : C, 75.36; H, 5.57; N, 7.03%; Found: C, 75.56; H, 5.50; N, 6.93%.

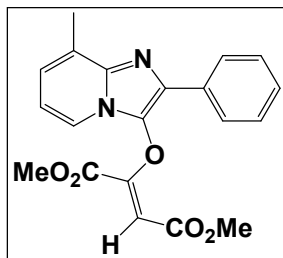

**Dimethyl 2-((8-methyl-2-phenylimidazo[1,2-a]pyridin-3-yl)oxy)fumarate (9b):**

Brown gummy mass (79%, 57 mg);  $^1\text{H}$  NMR (400 MHz,  $\text{CDCl}_3$ ):  $\delta$  7.92 (d,  $J = 6.8$  Hz, 1H), 7.87-7.85 (m, 2H), 7.39-7.35 (m, 2H), 7.31-7.27 (m, 1H), 6.99-6.97 (m, 1H), 6.77 (t,  $J = 6.8$  Hz, 1H), 6.19 (s, 1H), 3.68 (s, 3H), 3.56 (s, 3H), 2.62 (s, 3H);  $^{13}\text{C}$  NMR (100 MHz):  $\delta$  163.7, 161.4, 149.6, 139.8, 132.3, 131.4, 129.5, 128.4, 127.8, 127.6, 127.4, 123.2, 120.3, 112.2, 109.9, 53.2, 52.1, 16.5; HRMS calcd for  $\text{C}_{20}\text{H}_{19}\text{N}_2\text{O}_5$   $[\text{M} + \text{H}]^+$ : 367.1288; found  $[\text{M} + \text{H}]^+$ : 367.1293.

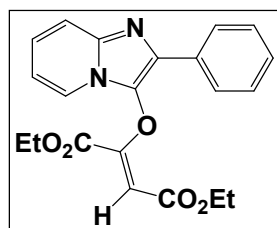

**Diethyl 2-((2-phenylimidazo[1,2-a]pyridin-3-yl)oxy)fumarate (9c):**

Brown gummy mass (73%, 55 mg);  $^1\text{H}$  NMR (400 MHz,  $\text{CDCl}_3$ ):  $\delta$  8.05 (d,  $J = 6.8$  Hz, 1H), 7.83 (d,  $J = 7.6$  Hz, 2H), 7.62 (d,  $J = 9.2$  Hz, 1H), 7.33 (t,  $J = 8.0$  Hz, 2H), 7.28-7.24 (m, 1H), 7.21-7.17 (m, 1H), 6.86 (t,  $J = 6.8$  Hz, 1H), 6.19 (s, 1H), 4.17 (q,  $J = 14.4$  Hz,  $J = 7.2$  Hz, 2H), 3.96 (q,  $J = 14.4$  Hz,  $J = 7.2$  Hz, 2H), 1.25 (t,  $J = 7.2$  Hz, 3H), 0.91 (t,  $J = 7.2$  Hz, 3H);  $^{13}\text{C}$  NMR (100 MHz):  $\delta$  163.3, 160.8, 149.9, 139.4, 131.7, 131.3, 129.7, 128.4, 127.9, 127.6, 124.7, 122.5, 117.5, 112.3, 110.3, 62.6, 61.3, 14.1, 13.6; Anal. Calcd for  $\text{C}_{21}\text{H}_{20}\text{N}_2\text{O}_5$ : C, 66.31; H, 5.30; N, 7.36%; Found: C, 66.10; H, 5.21; N, 7.47%.

## 5. References

1. a) H. A. Riley and A. R. Gray, *Organic Syntheses*; Wiley & Sons: New York, NY, 1943; Collect. Vol. II, p 509; b) P. Wang, W.-J. Tao, X.-L. Sun, S. Liao and Y. Tang, *J. Am. Chem. Soc.*, 2013, **135**, 16849; c) S. Batra and H. Batchu, *Eur. J. Org. Chem.*, 2012, 2935.
2. a) B. Alcaide, J. Plumet, M. A. Sierra and C. Vicent, *J. Org. Chem.*, 1989, **54**, 5763; b) B. Alcaide, R. Pgrez-Ossorio, J. Plumet and M. A. Sierra, *Tetrahedron Lett.*, 1986, **27**, 1627.



**6. NMR spectra for the synthesized compounds:**

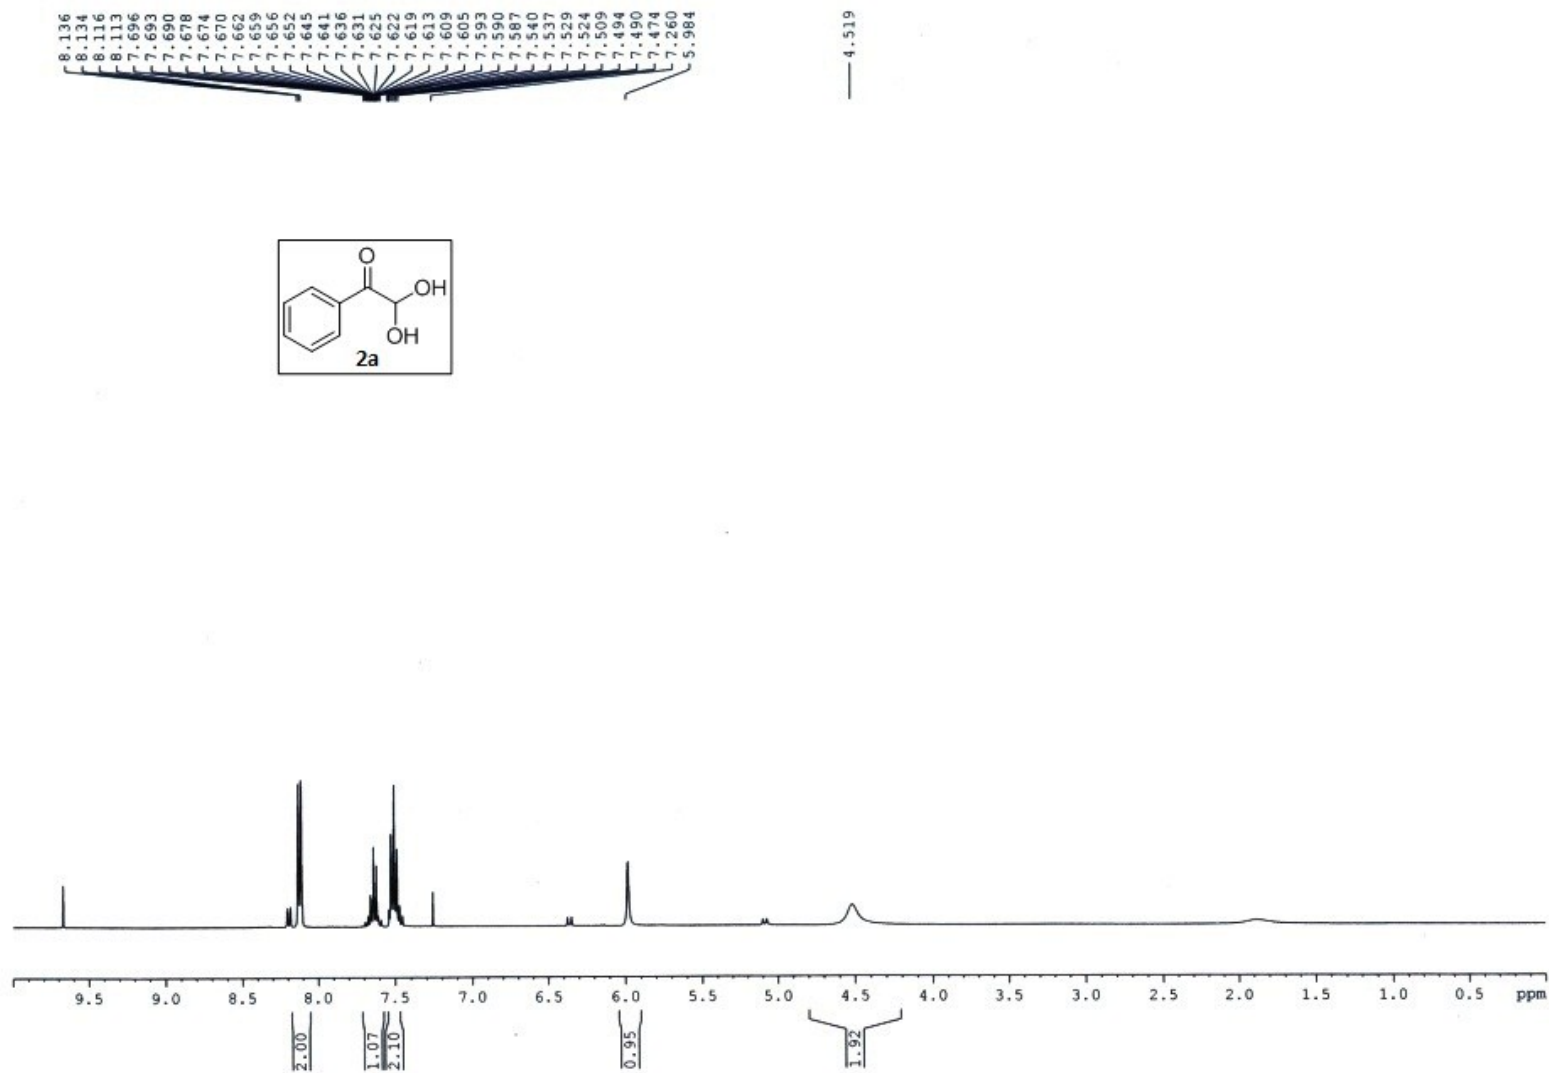

— 195.08  
— 189.78

134.76  
130.65  
130.01  
128.98

— 87.32  
77.47  
77.15  
76.84

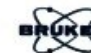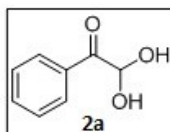

Current Data Parameters  
NAME Dr.A.HAJRA 2017  
EXPNO 1363  
PROCNO 1

F2 - Acquisition Parameters  
Date\_ 20170807  
Time 16.42  
INSTRUM spect  
PROBHD 5 mm PABBO BB/  
PULPROG zgpg30  
TD 32768  
SOLVENT CDCl3  
NS 240  
DS 2  
SWH 24038.461 Hz  
FIDRES 0.733596 Hz  
AQ 0.6815744 sec  
RG 106.66  
DW 20.800 usec  
DE 6.50 usec  
TE 299.1 K  
D1 2.0000000 sec  
D11 0.0300000 sec  
TDO 1

----- CHANNEL f1 -----  
SFO1 100.6278588 MHz  
NUC1 13C  
P1 8.90 usec  
PLW1 54.0000000 W

----- CHANNEL f2 -----  
SFO2 400.1516006 MHz  
NUC2 1H  
CPDPRG2 waltz16  
PCPD2 90.00 usec  
PLW2 12.0000000 W  
PLW12 0.32231000 W  
PLW13 0.16212000 W

F2 - Processing parameters  
SI 16384  
SF 100.6177843 MHz  
WDW EM  
SSB 0  
LB 1.00 Hz  
GB 0  
PC 1.40

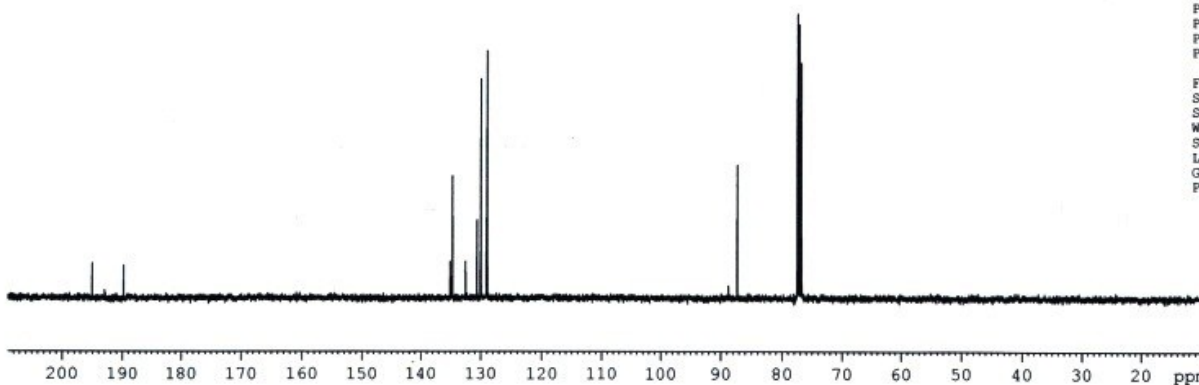

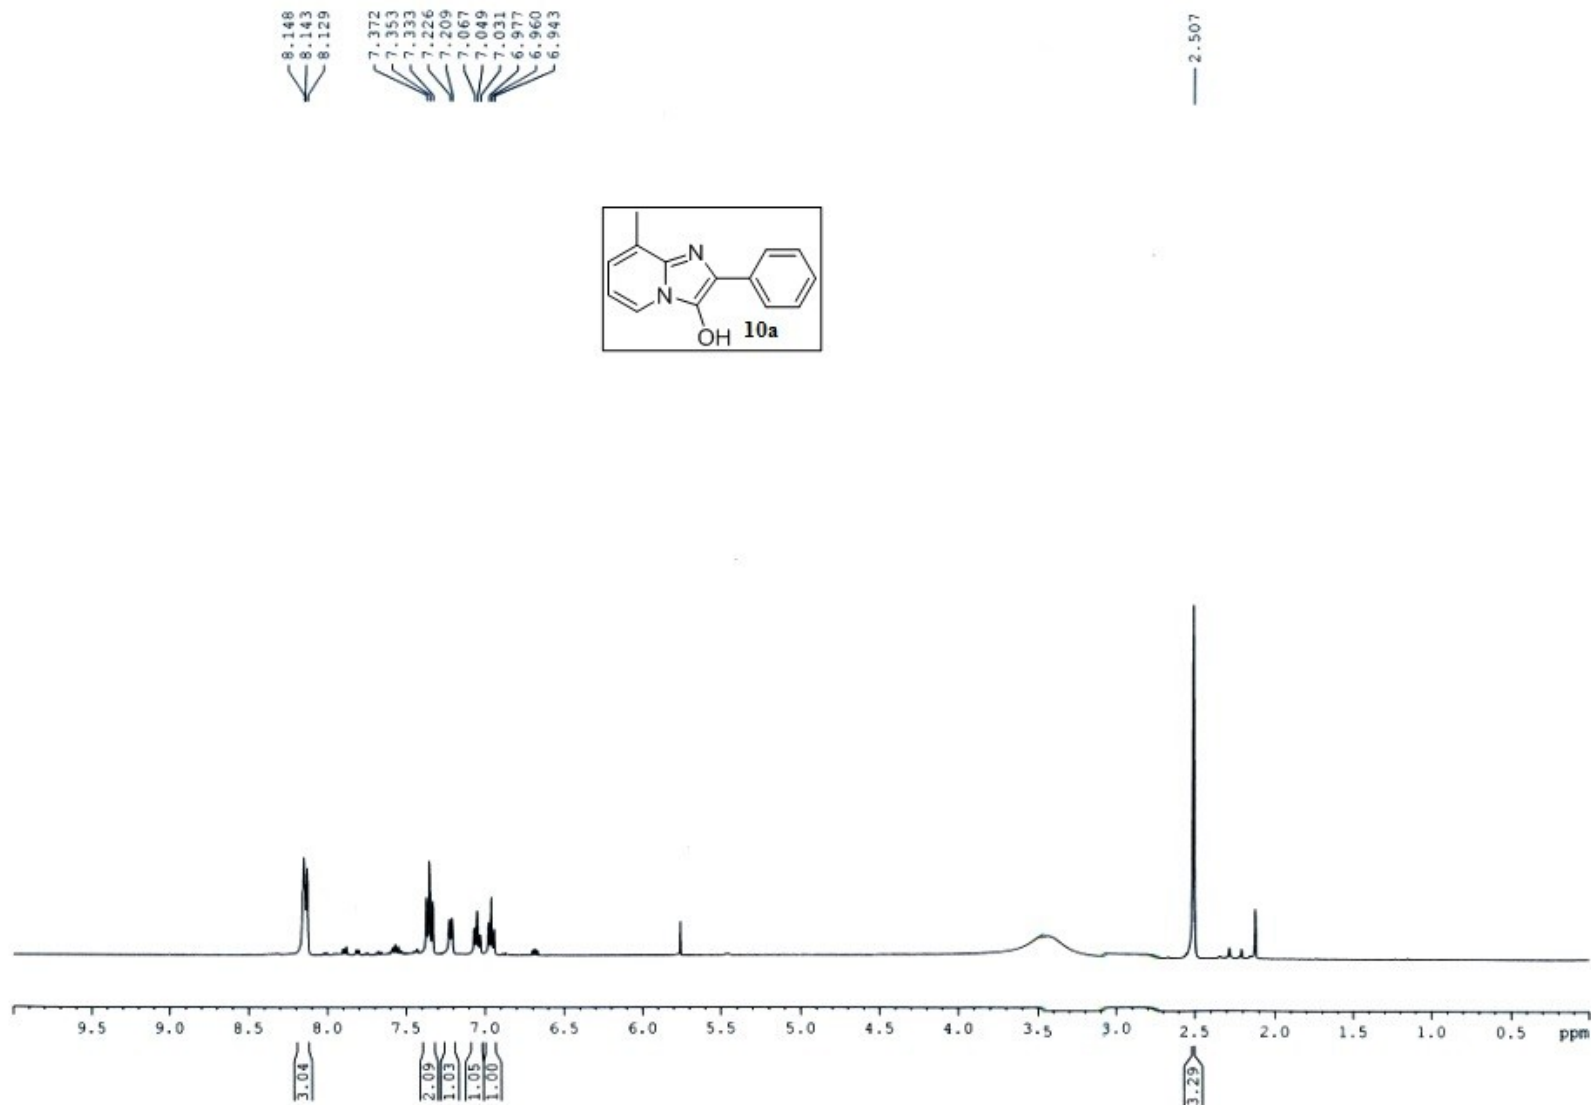

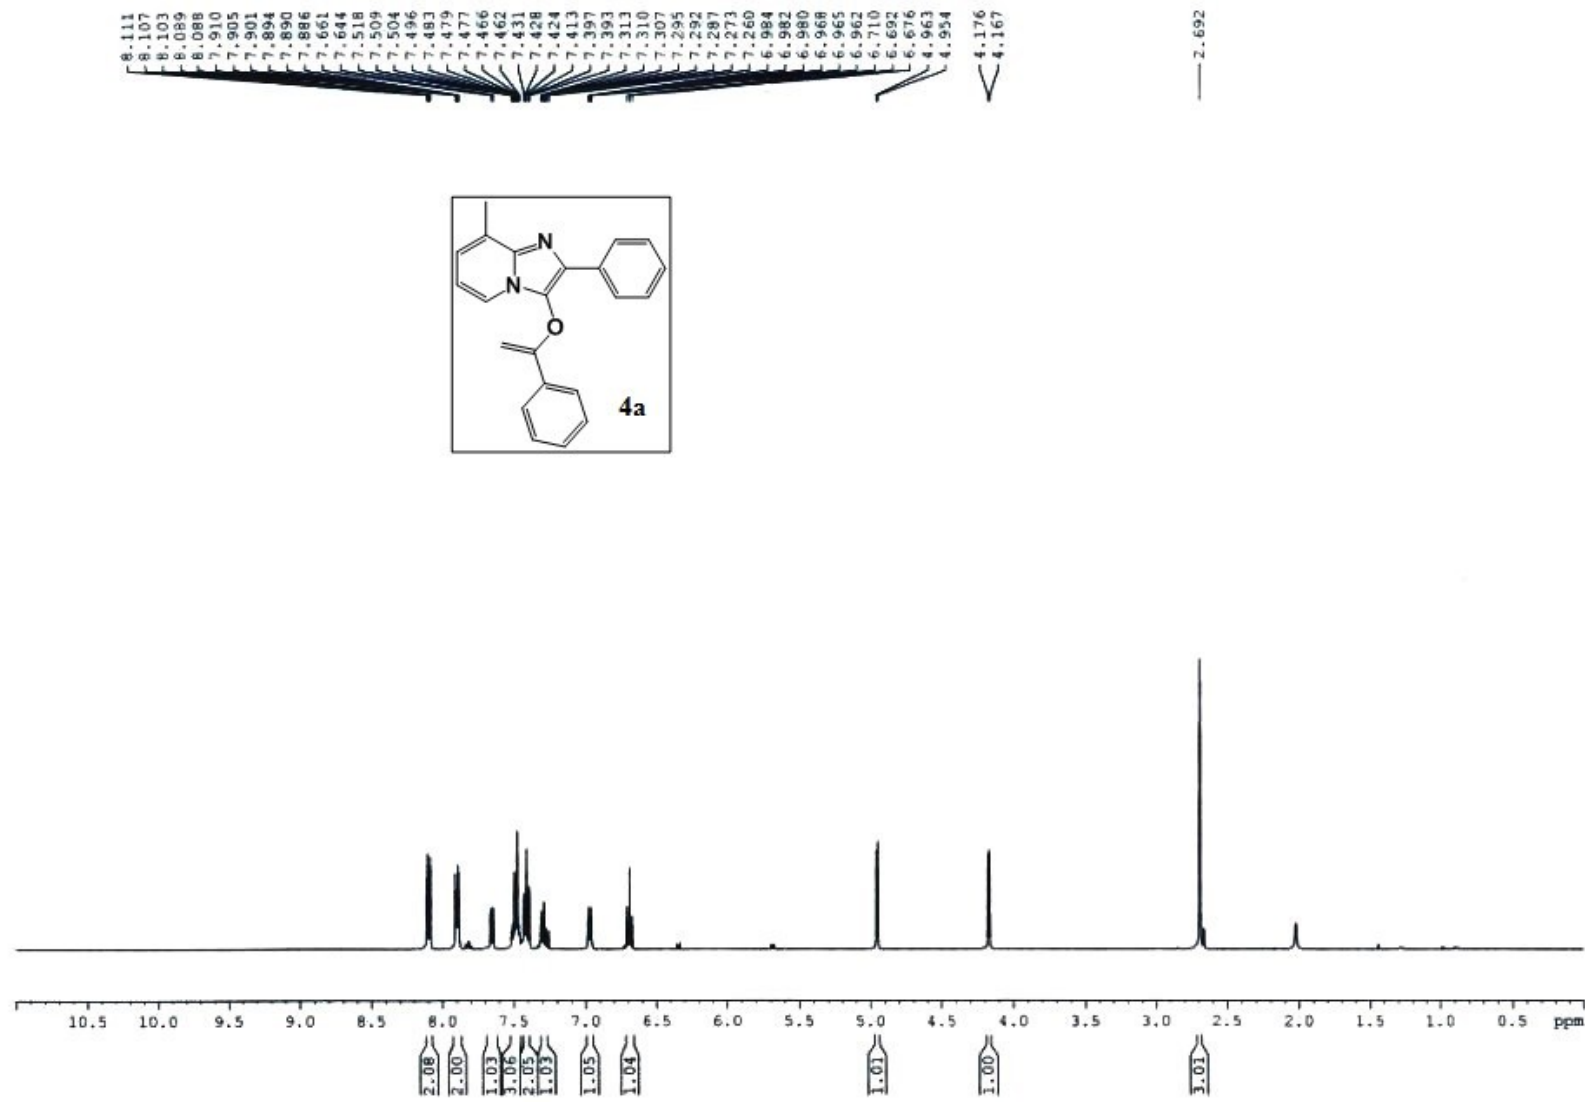

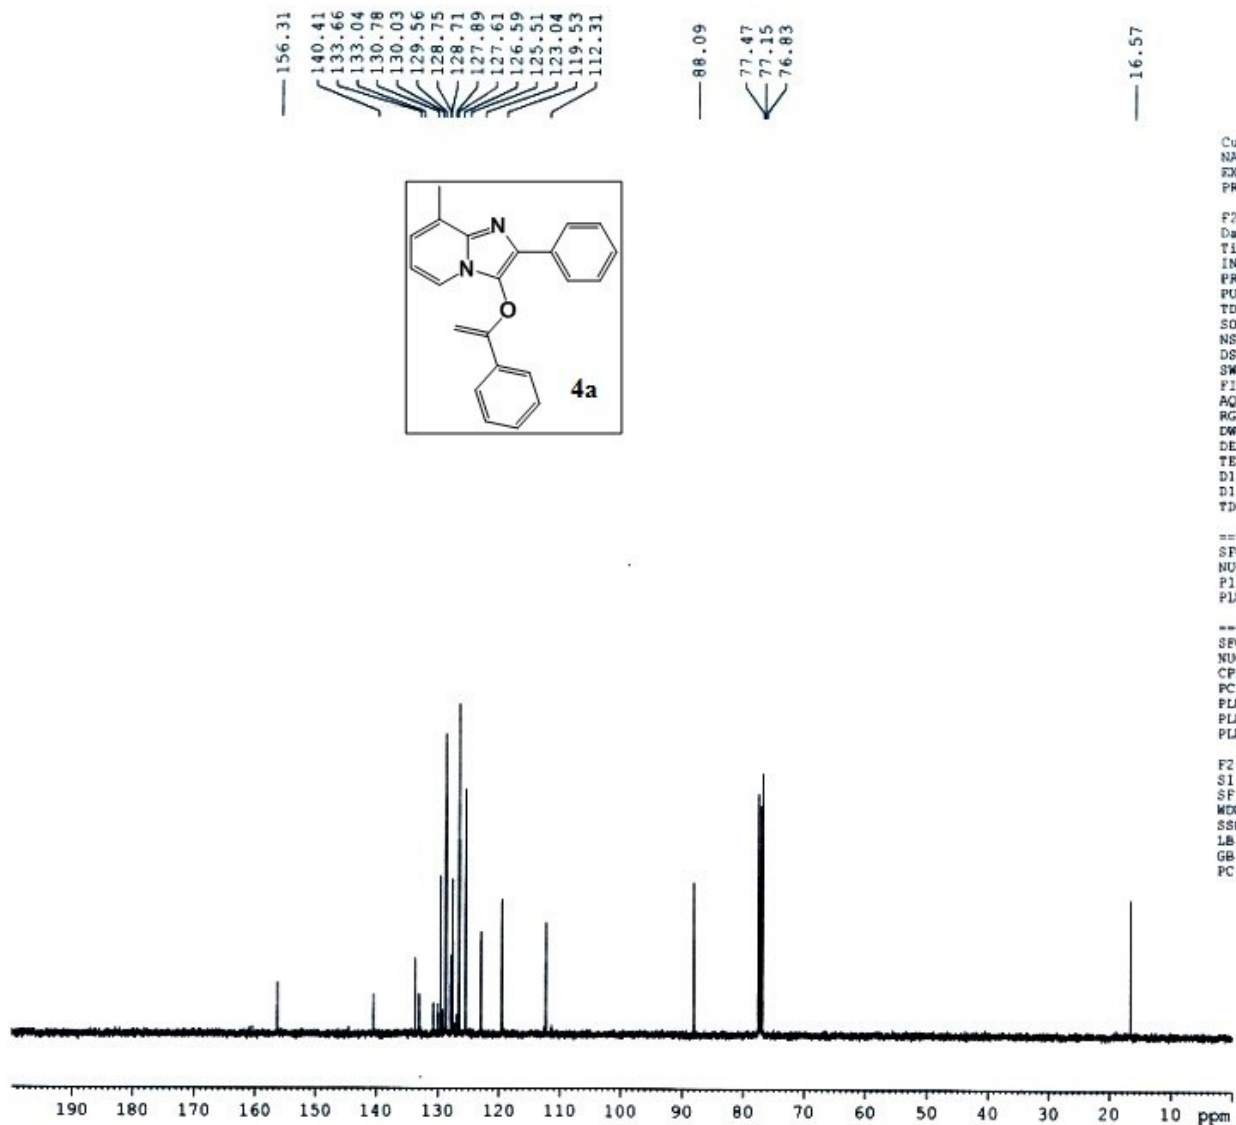

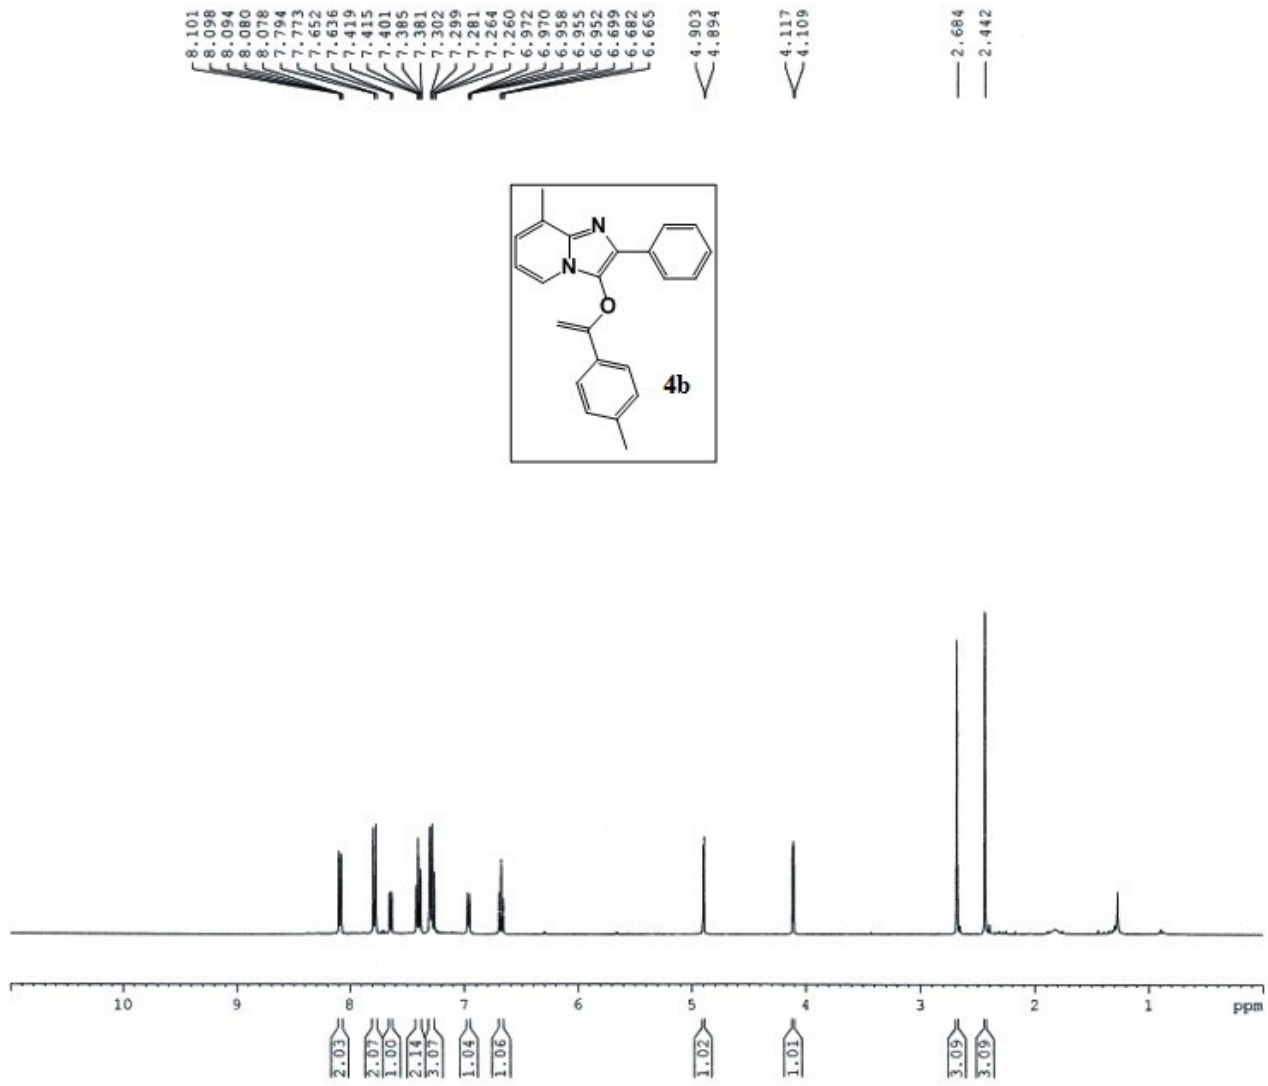

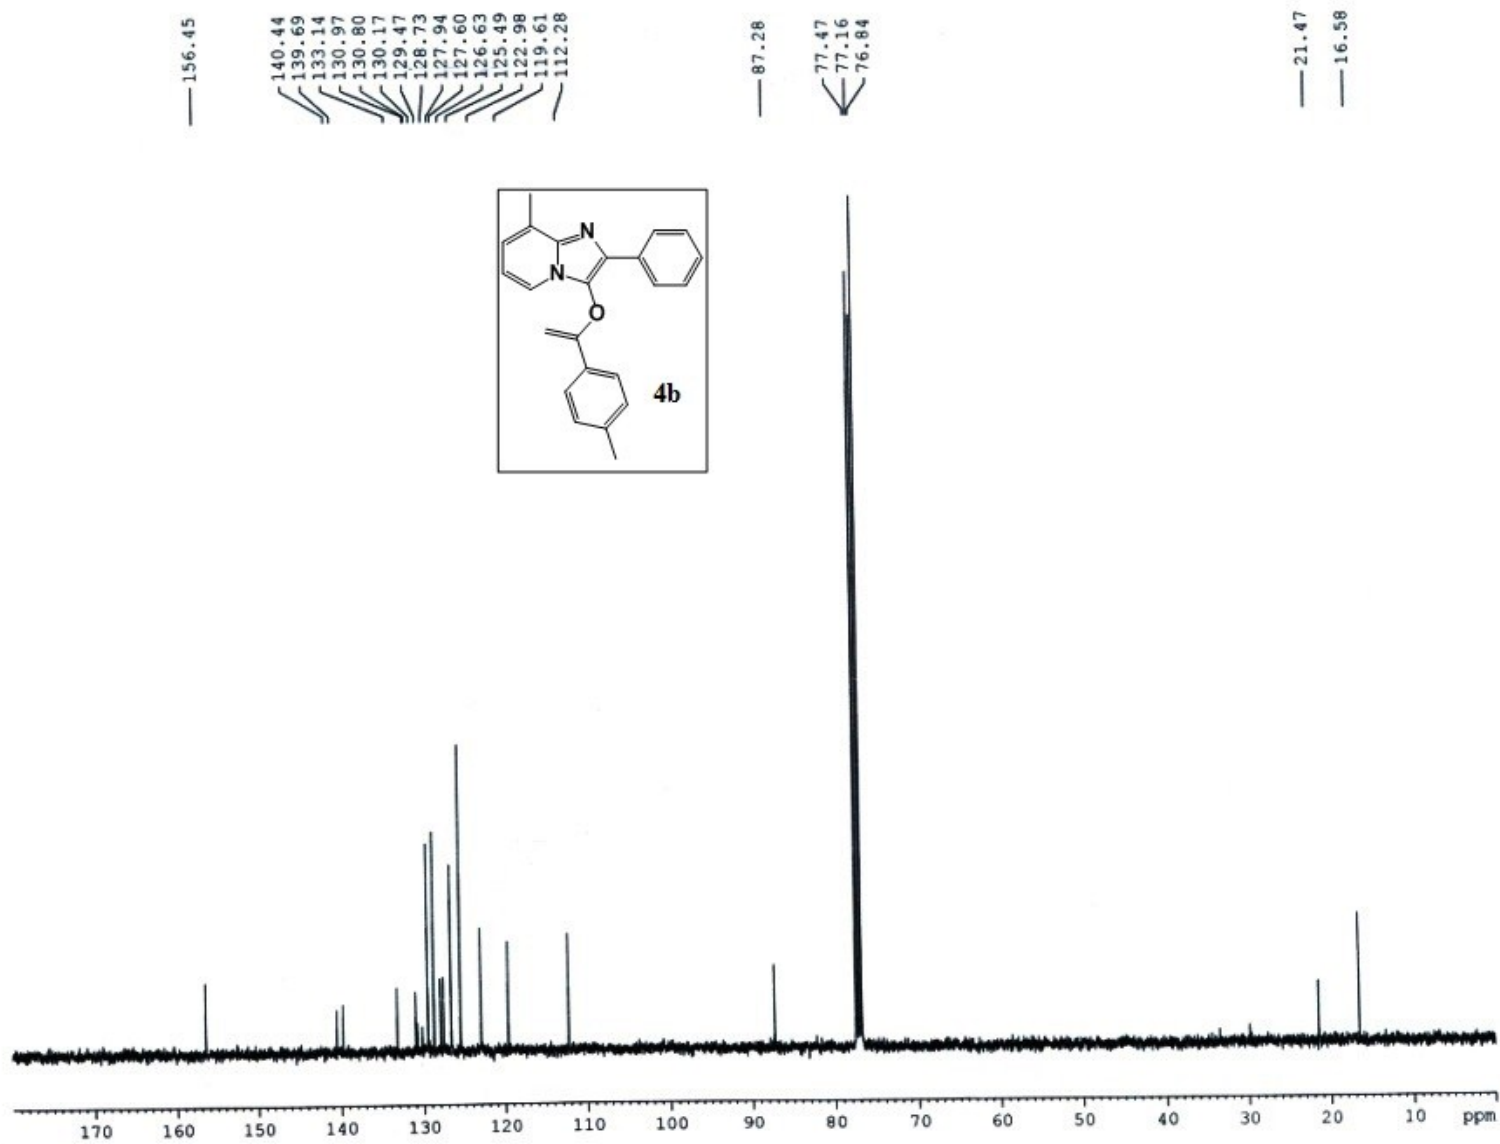



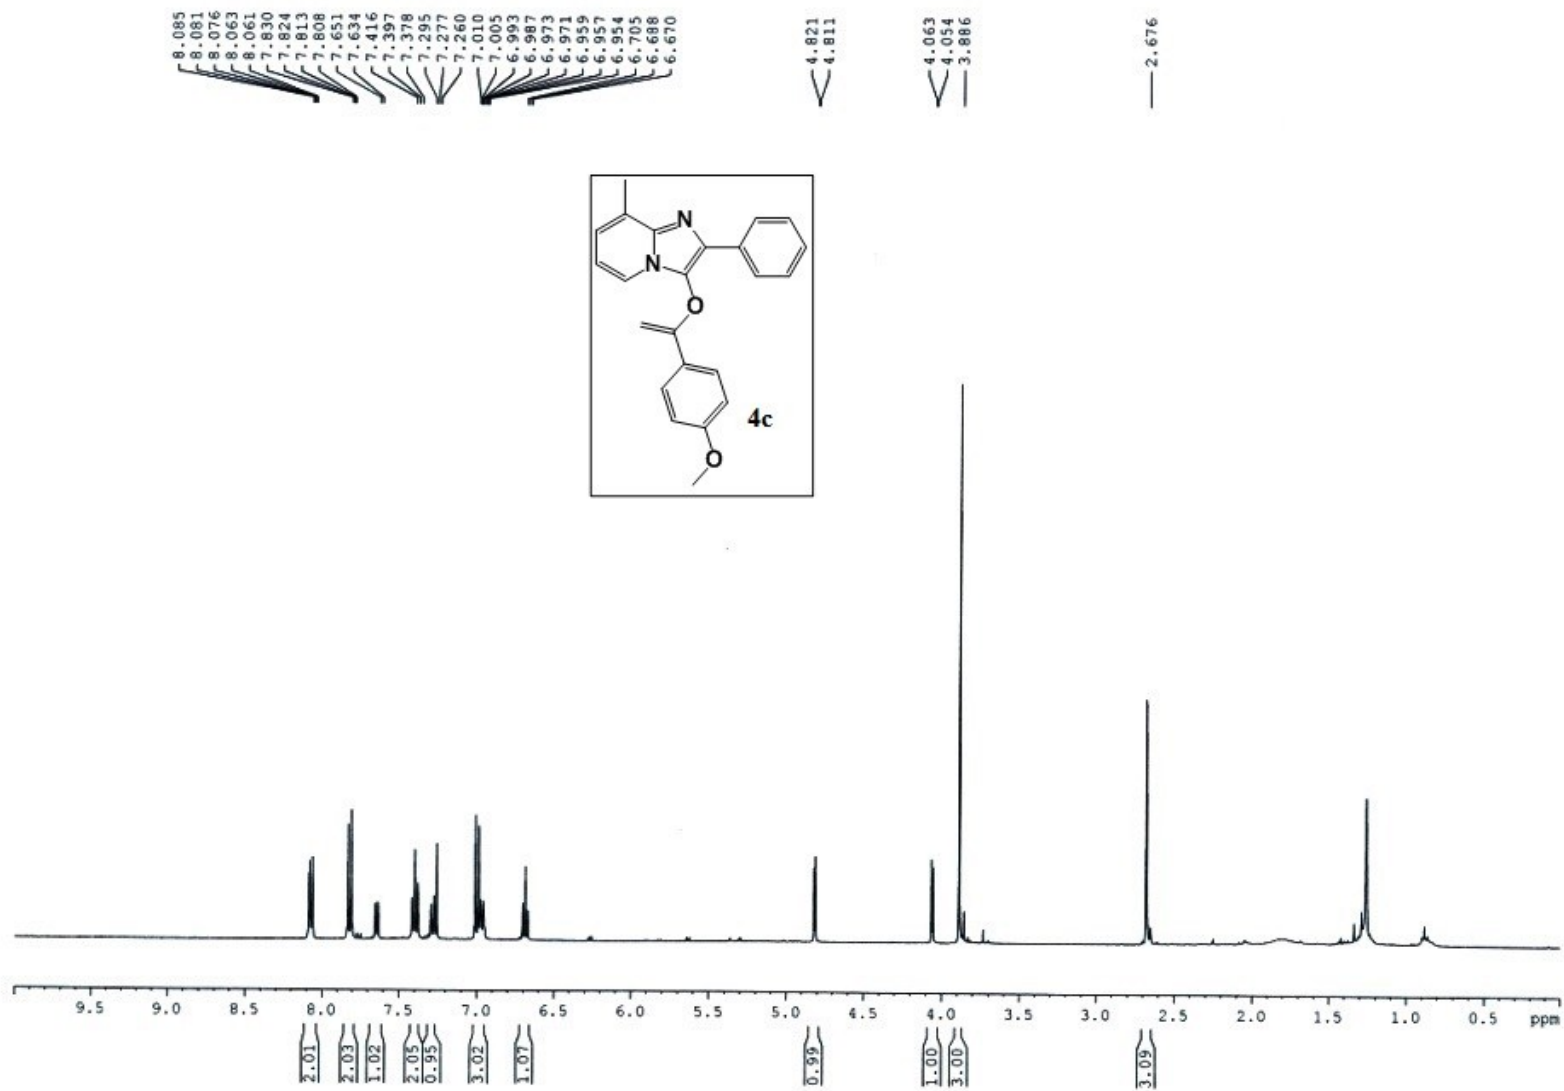

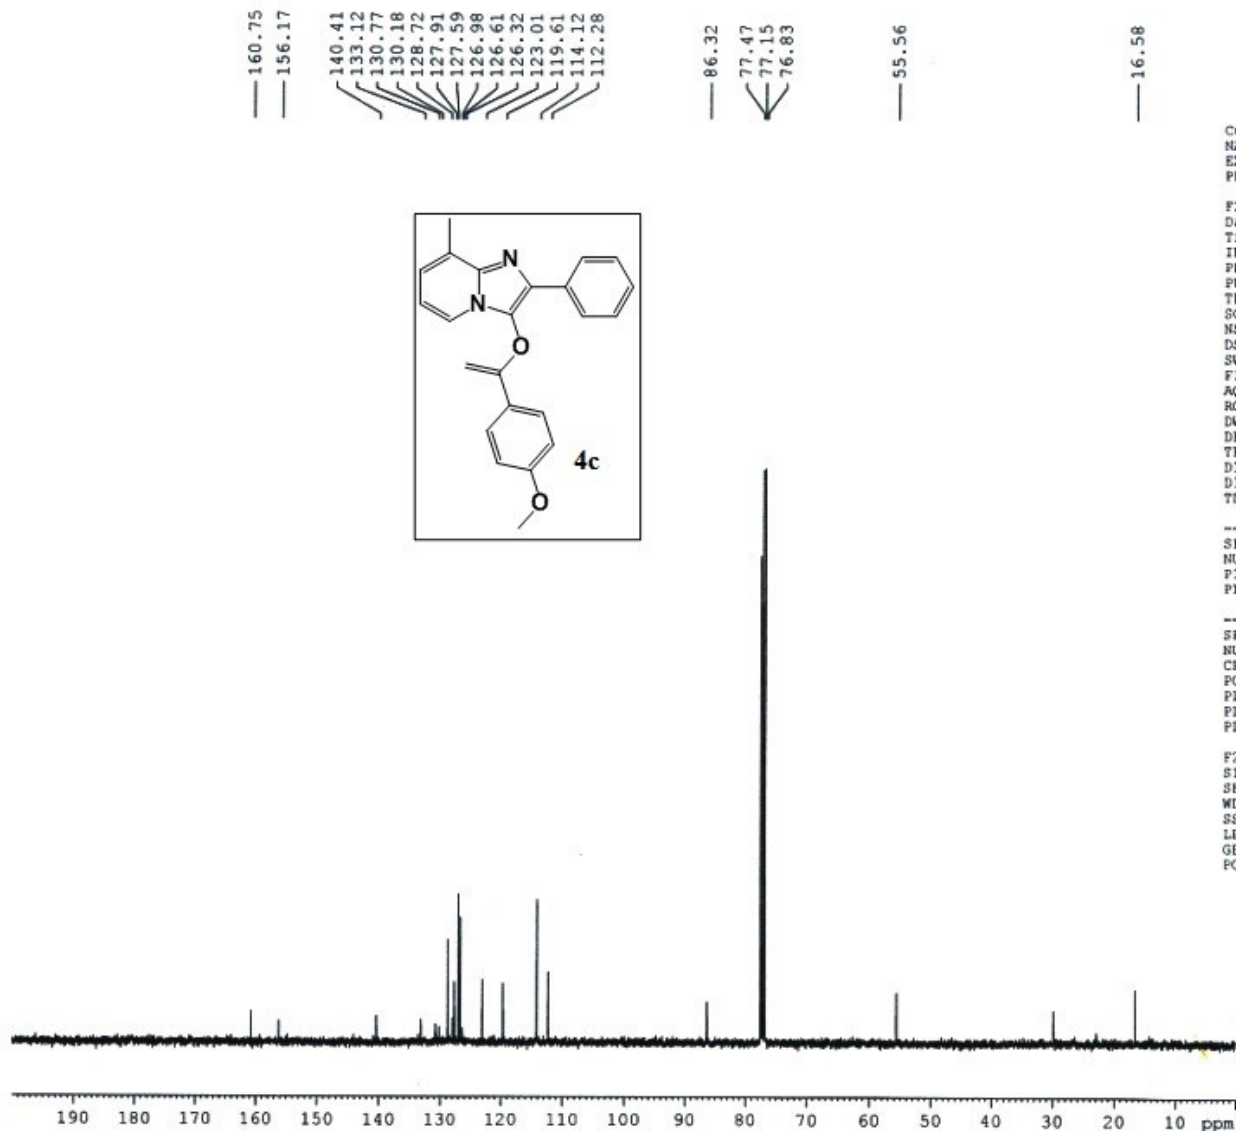

Current Data Parameters  
 NAME Dr.A.HAJRA 2016  
 EXPNO 179  
 PROCNO 1

F2 - Acquisition Parameters  
 Date\_ 20160506  
 Time 9.50  
 INSTRUM spect  
 PROBRD 5 mm PABBO BB/  
 PULPROG zgpg30  
 TD 32768  
 SOLVENT CDCl3  
 NS 480  
 DS 2  
 SWH 24038.461 Hz  
 FIDRES 0.733596 Hz  
 AQ 0.6815744 sec  
 RG 120.16  
 DW 20.800 usec  
 DE 6.50 usec  
 TE 298.2 K  
 D1 2.00000000 sec  
 D11 0.03000000 sec  
 TDO 1

----- CHANNEL f1 -----  
 SFO1 100.6278588 MHz  
 NUC1 13C  
 P1 8.90 usec  
 PLW1 54.00000000 W

----- CHANNEL f2 -----  
 SFO2 400.1516006 MHz  
 NUC2 1H  
 CPDPRG12 waltz16  
 PCPD2 90.00 usec  
 PLW2 12.00000000 W  
 PLW12 0.32231000 W  
 PLW13 0.16212000 W

F2 - Processing parameters  
 SI 16384  
 SF 100.6177843 MHz  
 WDW EM  
 SSB 0  
 LB 1.00 Hz  
 GB 0  
 PC 1.40

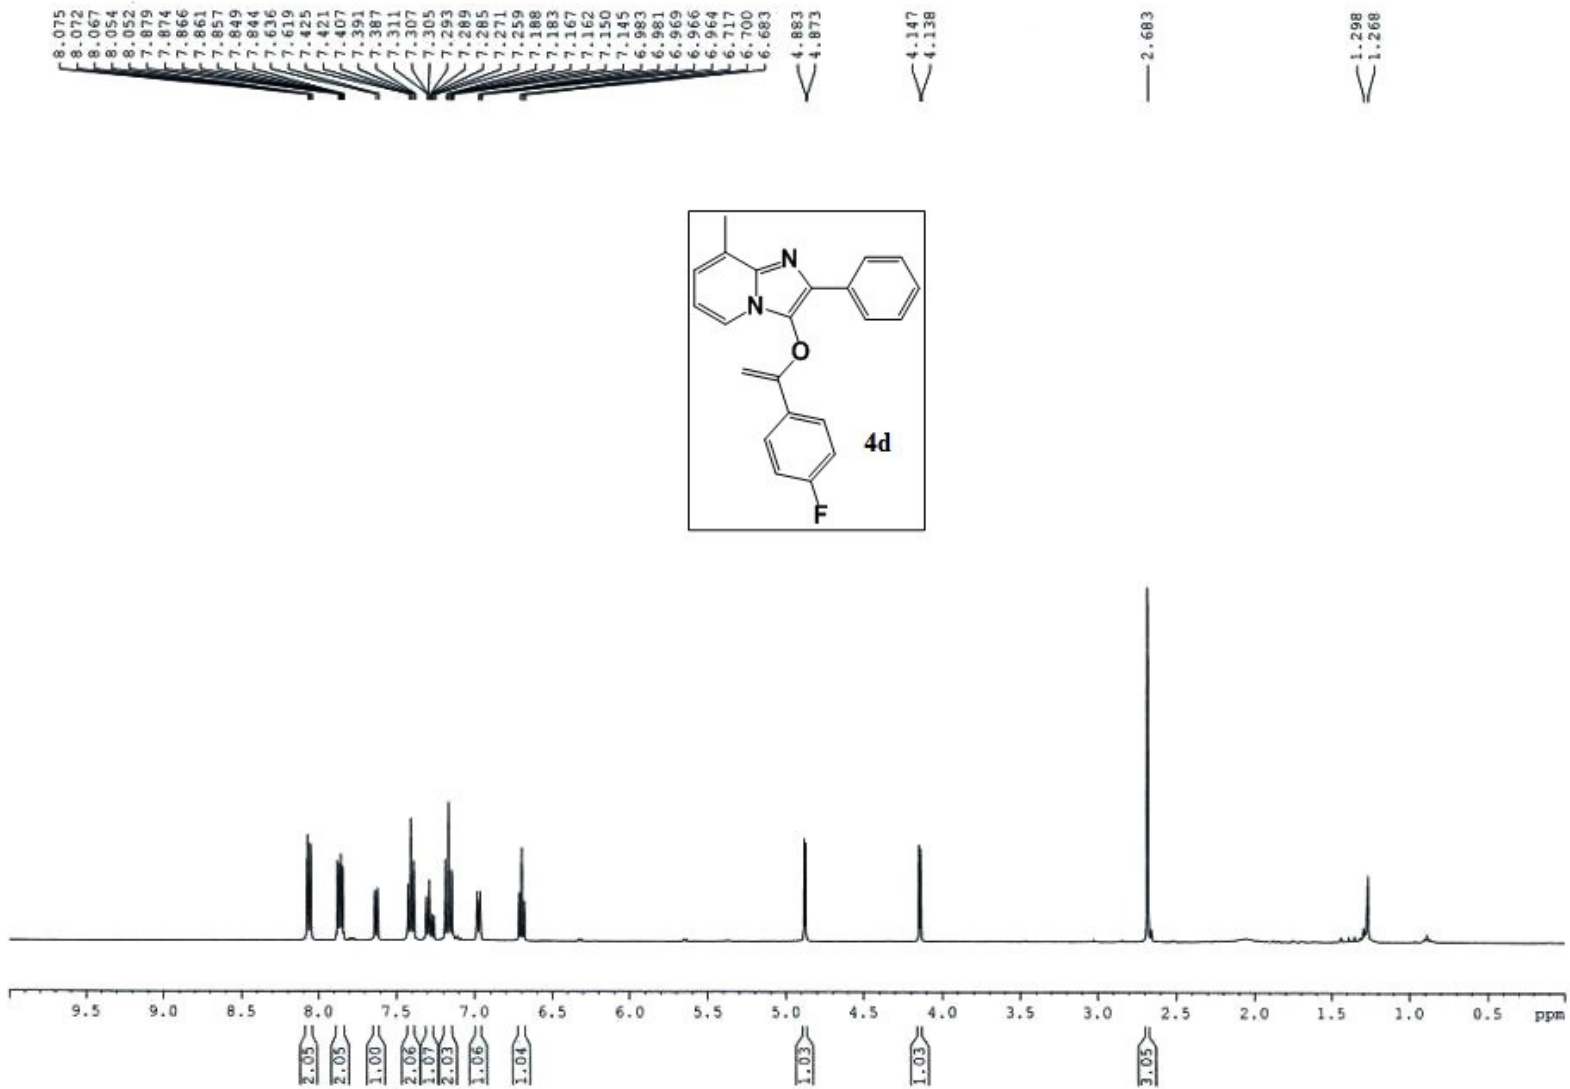

164.85  
162.37  
155.55  
140.44  
133.00  
130.81  
129.90  
129.87  
129.83  
128.73  
127.97  
127.68  
127.50  
127.42  
126.60  
123.09  
119.45  
115.88  
115.66  
112.40

87.86  
77.47  
77.16  
76.84

16.57

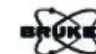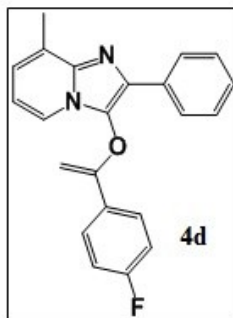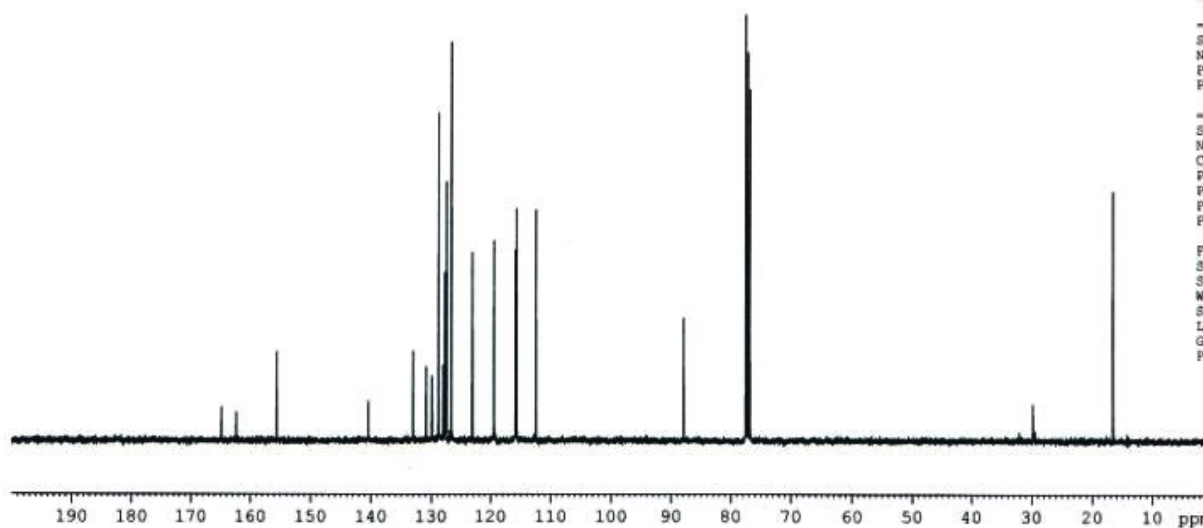

Current Data Parameters  
NAME Dr.A.HAJRA 2016  
EXPMO 517  
PROCNO 1

F2 - Acquisition Parameters  
Date\_ 20160616  
Time\_ 19.03  
INSTRUM spect  
PROBHD 5 mm PABBO BB/  
PULPROG zgpg30  
TD 32768  
SOLVENT CDCl3  
NS 400  
DS 2  
SWH 24038.461 Hz  
FIDRES 0.733596 Hz  
AQ 0.6815744 sec  
RG 62.69  
SW 20.800 usec  
DE 6.50 usec  
TE 298.6 K  
D1 2.00000000 sec  
D11 0.03000000 sec  
TDC 1

----- CHANNEL f1 -----  
SFO1 100.6278588 MHz  
NUC1 13C  
P1 8.90 usec  
PLW1 54.00000000 W

----- CHANNEL f2 -----  
SFO2 400.1516006 MHz  
NUC2 1H  
CPCPRG12 waltz16  
PCPD2 90.00 usec  
PLW2 12.00000000 W  
PLW12 0.32231000 W  
PLW13 0.16212000 W

F2 - Processing parameters  
SI 16384  
SF 100.6177873 MHz  
WDW EM  
SSB 0  
LB 1.00 Hz  
GB 0  
PC 1.40

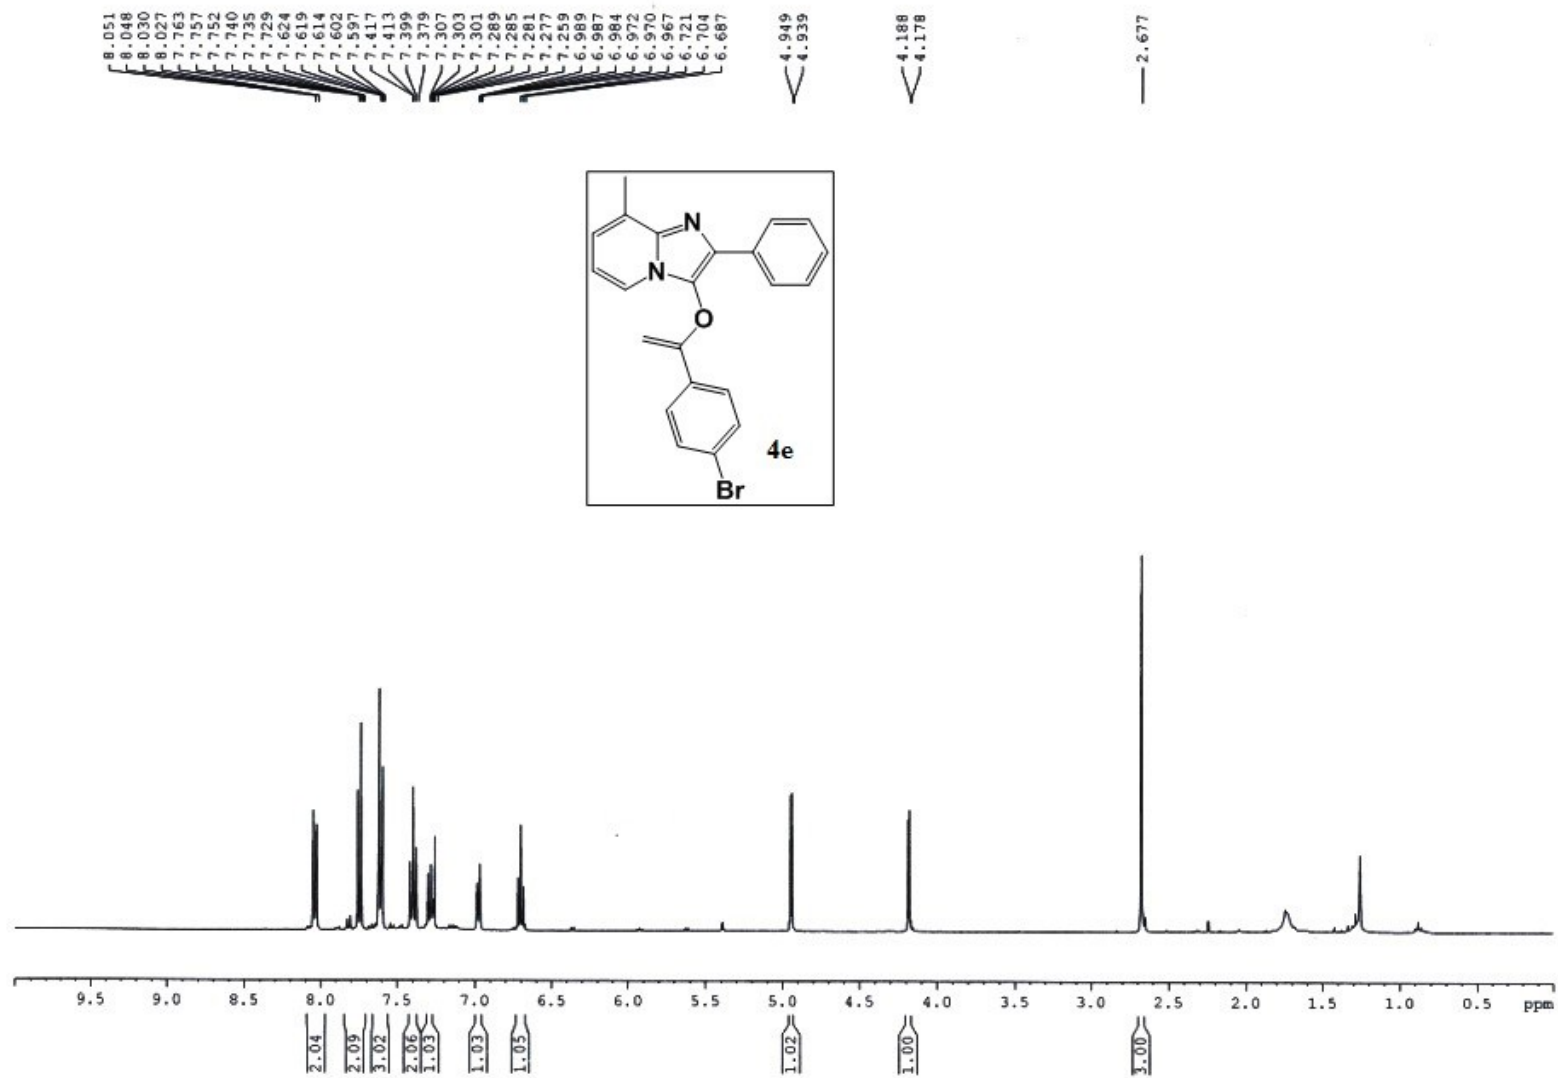

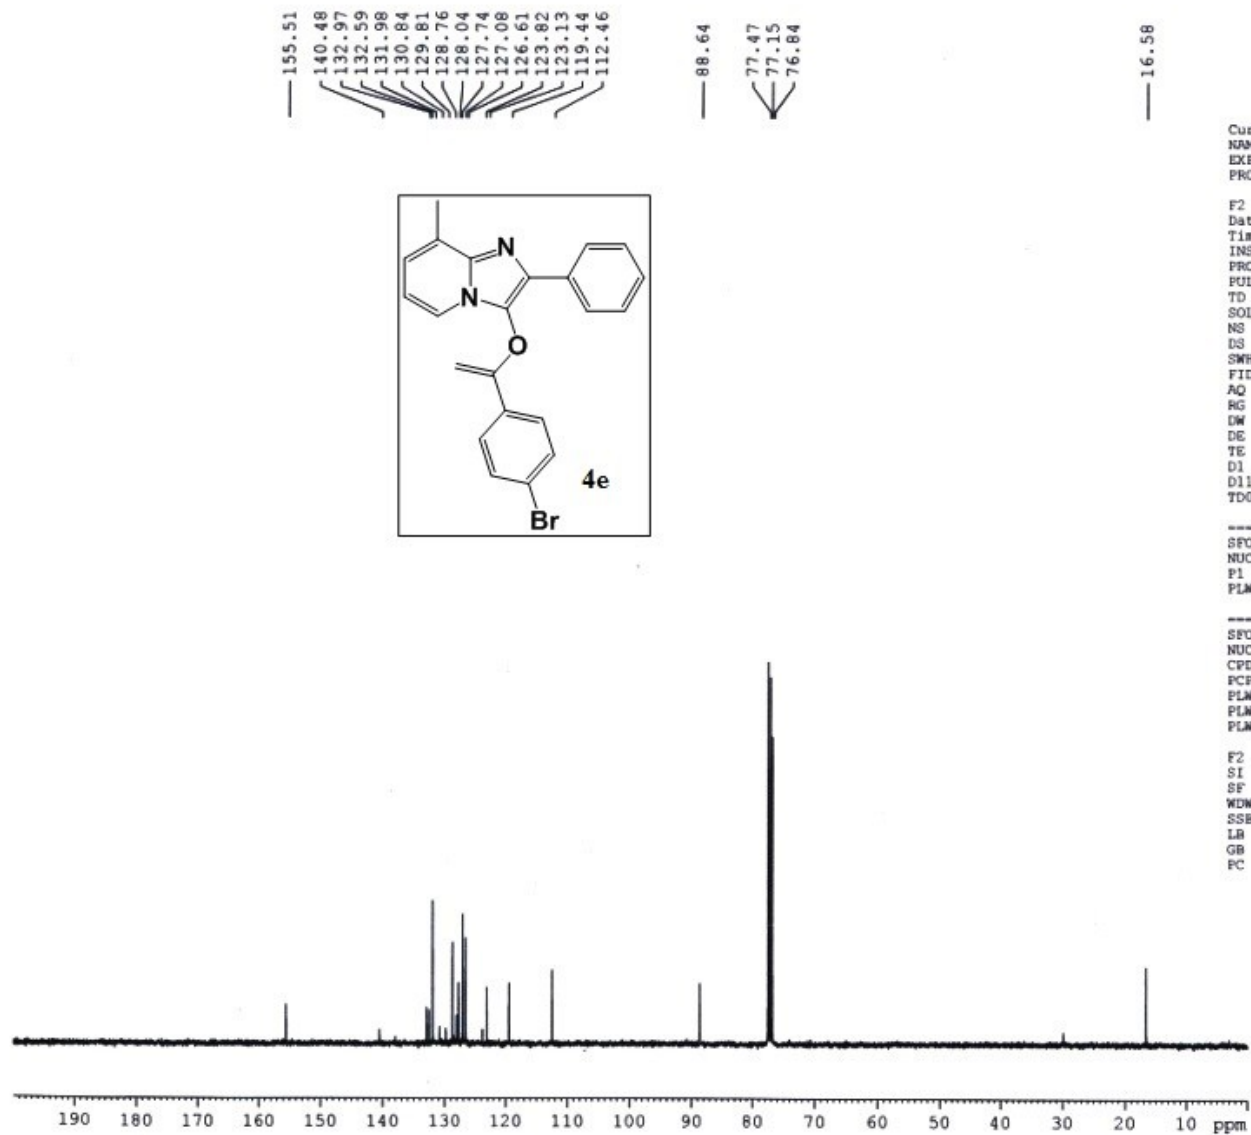

Current Data Parameters  
 NAME Dr.A.HAJRA 2016  
 EXPNO 336  
 PROCNO 1

F2 - Acquisition Parameters  
 Date\_ 20160520  
 Time\_ 12.32  
 INSTRUM spect  
 PROBHD 5 mm PABBO BB/  
 PULPROG zgpg30  
 TD 32768  
 SOLVENT CDCl3  
 NS 460  
 DS 2  
 SWH 24038.461 Hz  
 FIDRES 0.733596 Hz  
 AQ 0.6815744 sec  
 RG 120.16  
 DW 20.800 usec  
 DE 6.50 usec  
 TE 299.2 K  
 D1 2.00000000 sec  
 D11 0.03000000 sec  
 TDO 1

----- CHANNEL f1 -----  
 SFO1 100.6278588 MHz  
 NUC1 13C  
 P1 8.90 usec  
 PLW1 54.00000000 W

----- CHANNEL f2 -----  
 SFO2 400.1516006 MHz  
 NUC2 1H  
 CPDPRG12 waltz16  
 PCPD2 90.00 usec  
 PLW2 12.00000000 W  
 PLW12 0.32231000 W  
 PLW13 0.16212000 W

F2 - Processing parameters  
 SI 16384  
 SF 100.6177844 MHz  
 WDW EM  
 SSB 0  
 LB 1.00 Hz  
 GB 0  
 PC 1.40

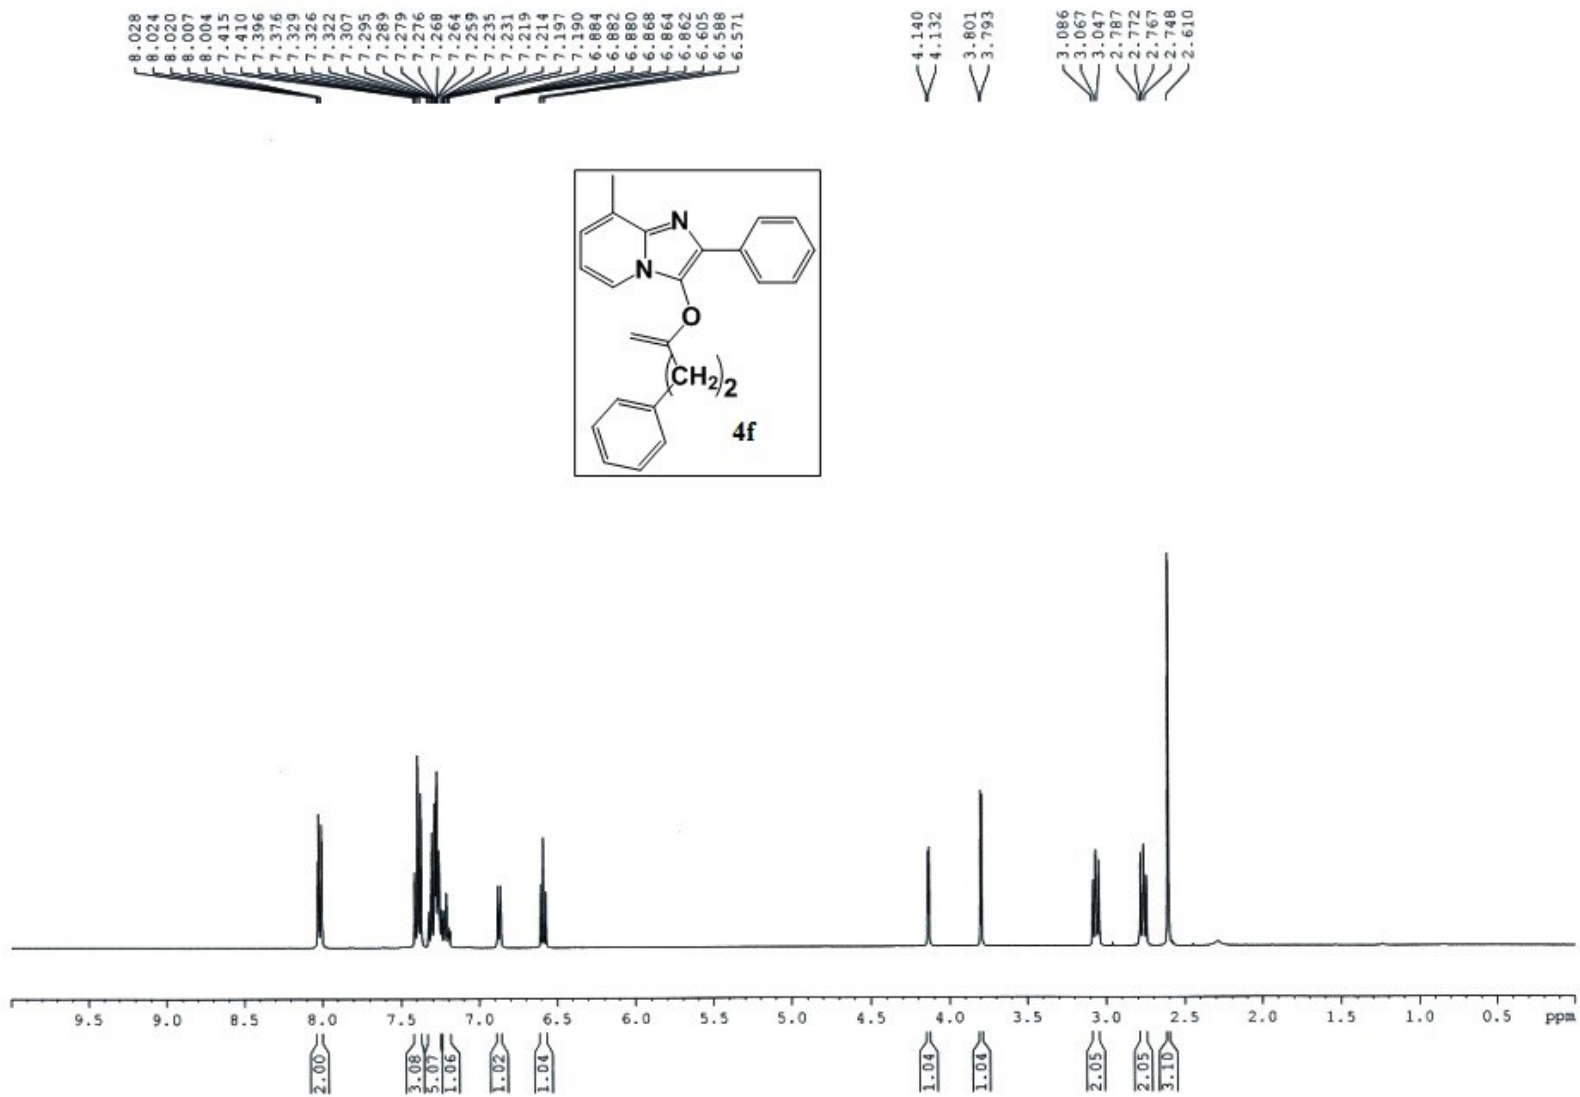

159.06  
 140.79  
 140.24  
 133.17  
 130.41  
 130.11  
 128.61  
 128.58  
 128.51  
 127.73  
 127.49  
 126.69  
 126.35  
 122.75  
 119.56  
 112.03  
 88.03  
 77.46  
 77.15  
 76.83  
 35.02  
 33.33  
 16.48

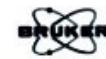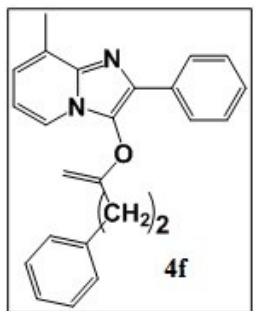

Current Data Parameters  
 NAME Dr.A.HAJRA 2016  
 EXPNO 427  
 PROCNO 1

F2 - Acquisition Parameters  
 Date\_ 20160602  
 Time 19.55  
 INSTRUM spect  
 PROBHD 5 mm PARBO BB/  
 PULPROG zgpg30  
 TD 32768  
 SOLVENT CDCl3  
 NS 256  
 DS 2  
 SWH 24038.461 Hz  
 FIDRES 0.733596 Hz  
 AQ 0.6815744 sec  
 RG 37.83  
 DW 20.800 usec  
 DE 6.50 usec  
 TE 301.8 K  
 D1 2.0000000 sec  
 D11 0.0300000 sec  
 TDO 1

----- CHANNEL f1 -----  
 SFO1 100.6279588 MHz  
 NUC1 13C  
 P1 8.90 usec  
 PLW1 54.0000000 W

----- CHANNEL f2 -----  
 SFO2 400.1516006 MHz  
 NUC2 1H  
 CPDPRG12 waltz16  
 PCPD2 90.00 usec  
 PLW2 12.0000000 W  
 PLW12 0.32231000 W  
 PLW13 0.16212000 W

F2 - Processing parameters  
 SI 16384  
 SF 100.6177961 MHz  
 WDW EM  
 SSB 0  
 LB 1.00 Hz  
 GB 0  
 PC 1.40

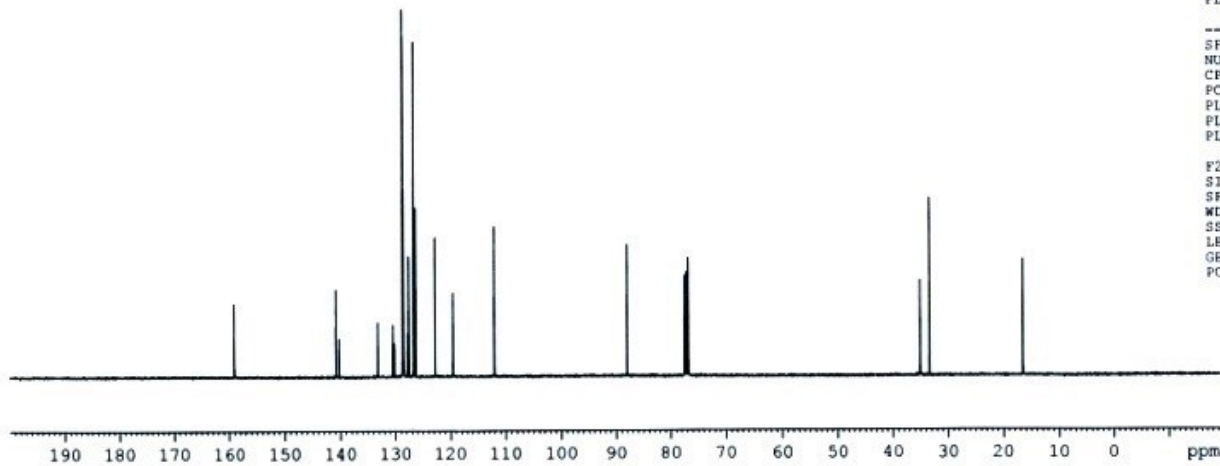



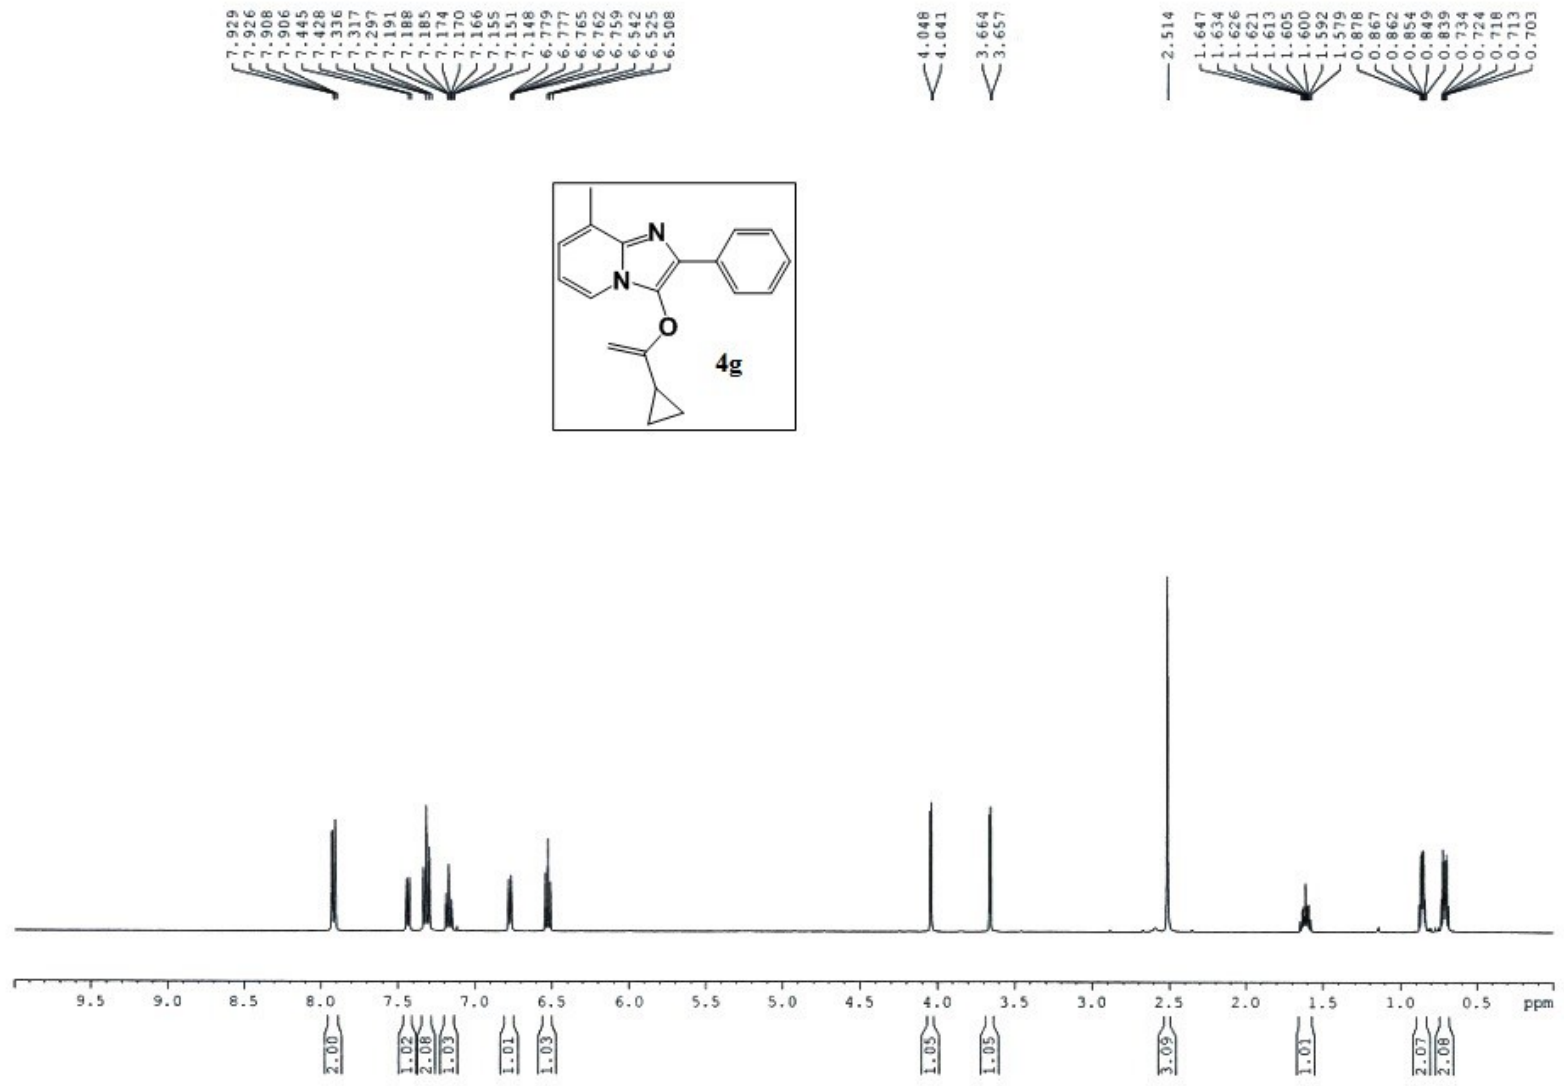

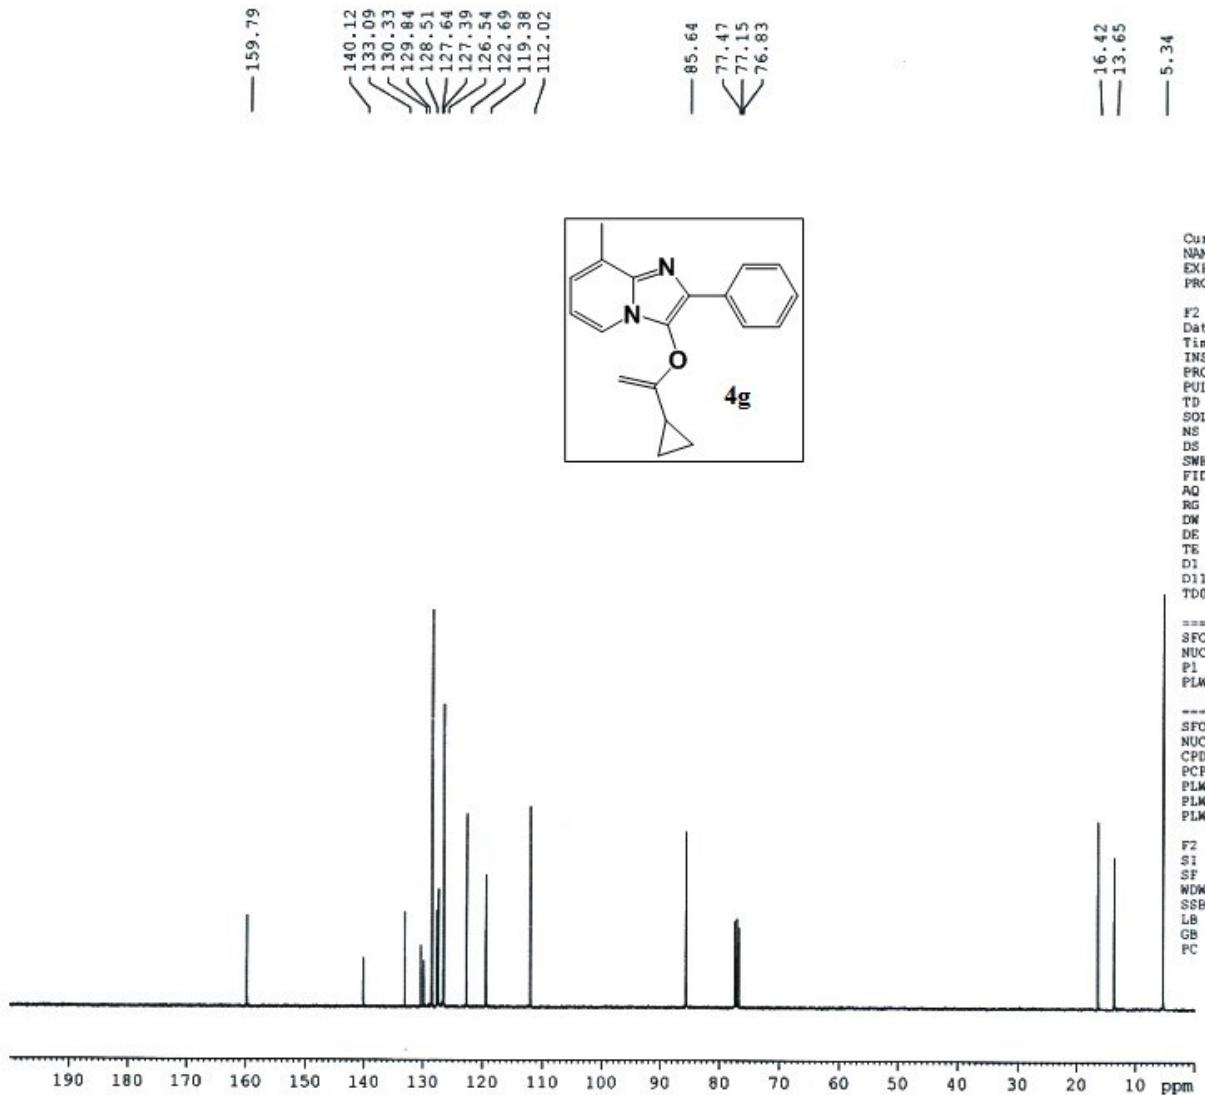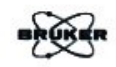

```

Current Data Parameters
NAME      Dr.A.RAJRA 2016
EXPNO     215
PROCNO    1

F2 - Acquisition Parameters
Date_     20160508
Time      15.13
INSTRUM   spect
PROBHD    5 mm PABBO BB/
PULPROG   zgpg30
TD         32768
SOLVENT   CDCl3
NS         120
DS         2
SWH        24038.461 Hz
FIDRES     0.733596 Hz
AQ         0.6815744 sec
RG         16.16
DW         20.800 usec
DE         6.50 usec
TE         299.4 K
D1         2.0000000 sec
D11        0.0300000 sec
TD0        1

===== CHANNEL f1 =====
SF01      100.6278588 MHz
NUC1       13C
P1         8.90 usec
PLW1       54.0000000 W

===== CHANNEL f2 =====
SF02      400.1516006 MHz
NUC2       1H
CPDPRG12   waltz16
PCPD2      90.00 usec
PLW2       12.0000000 W
PLW12      0.32231000 W
PLW13      0.16212000 W

F2 - Processing parameters
S1         16384
SF         100.6178005 MHz
WDW        EM
SSB        0
LB         1.00 Hz
GB         0
PC         1.40

```

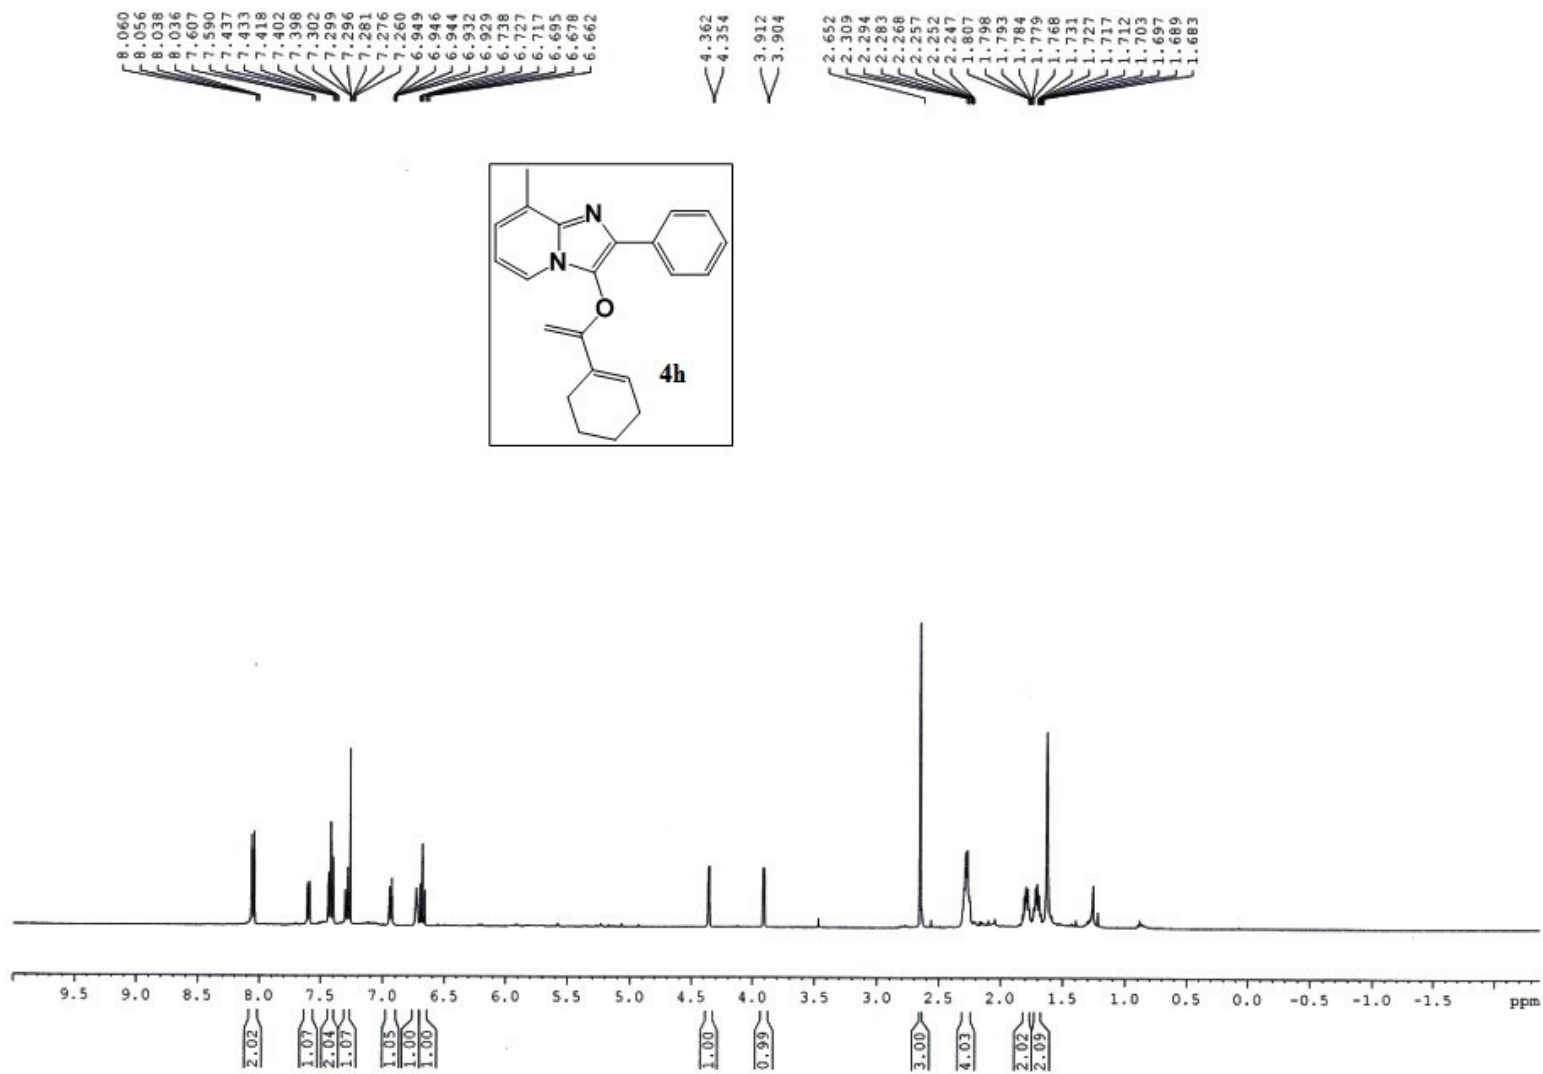

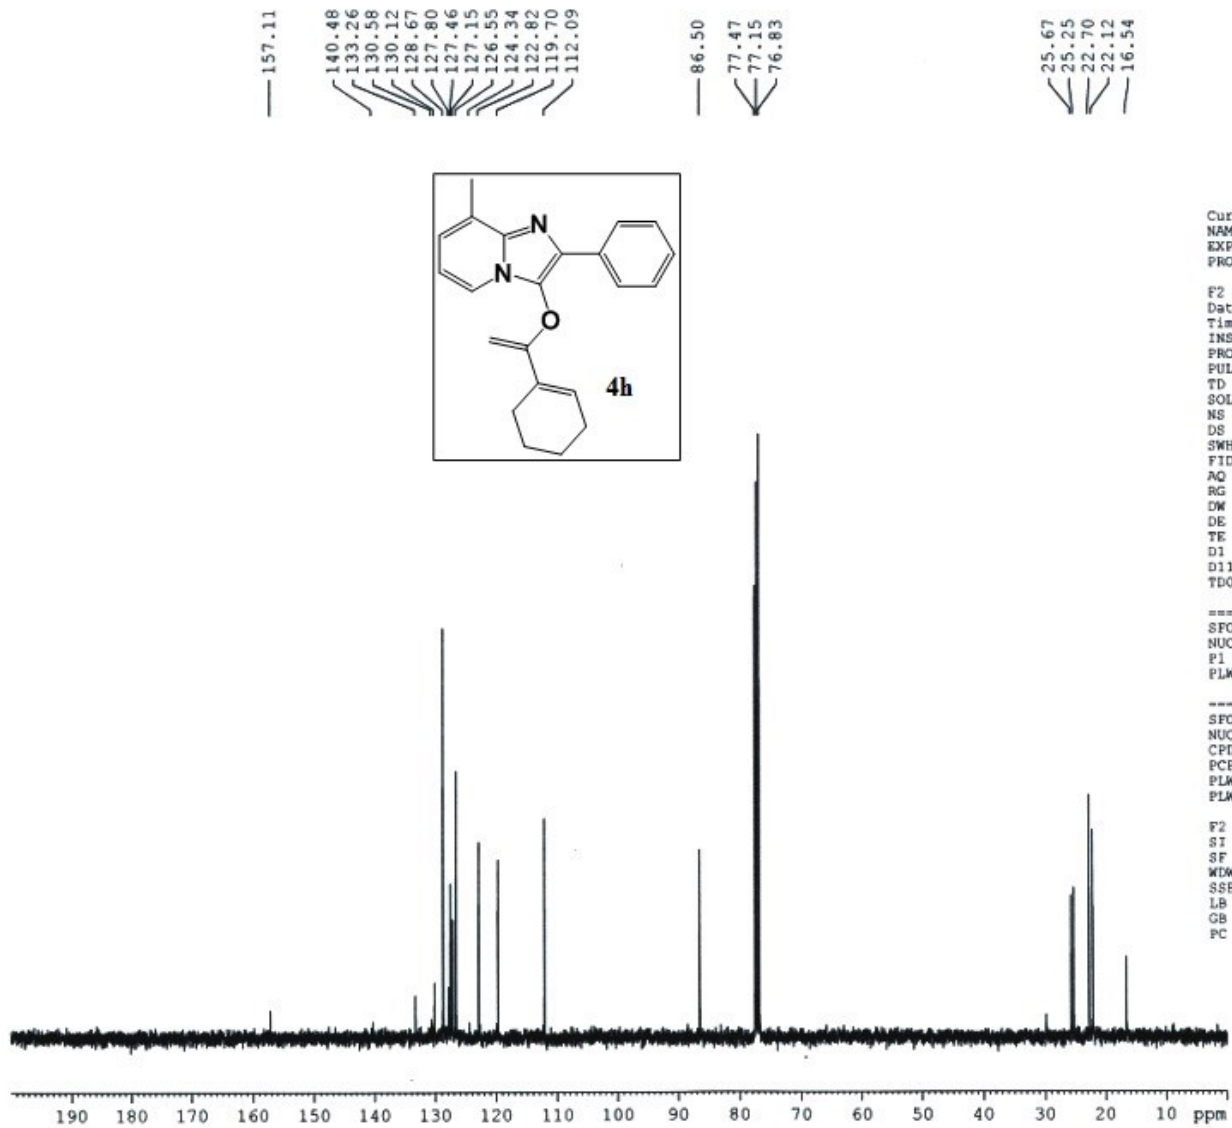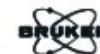

Current Data Parameters  
 NAME Dr.A.HAJRA 2016  
 EXPNO 409  
 PROCNO 1

F2 - Acquisition Parameters  
 Date\_ 20160529  
 Time 18.20  
 INSTRUM spect  
 PROBHD 5 mm PABBO BB/  
 PULPROG zgdc  
 TD 32768  
 SOLVENT CDC13  
 NS 640  
 DS 2  
 SWH 24038.461 Hz  
 FIDRES 0.733596 Hz  
 AQ 0.6815744 sec  
 RG 168.31  
 DW 20.800 usec  
 DE 6.50 usec  
 TE 302.3 K  
 D1 2.00000000 sec  
 D11 0.03000000 sec  
 TDO 1

----- CHANNEL f1 -----  
 SFO1 100.6278588 MHz  
 NUC1 13C  
 P1 8.90 usec  
 PLW1 54.00000000 W

----- CHANNEL f2 -----  
 SFO2 400.1516006 MHz  
 NUC2 1H  
 CPDPRG[2] waltz16  
 PCPD2 90.00 usec  
 PLW2 12.00000000 W  
 PLW12 0.32231000 W

F2 - Processing parameters  
 SI 16384  
 SF 100.6177829 MHz  
 WDW EM  
 SSB 0  
 LB 1.00 Hz  
 GB 0  
 PC 1.40

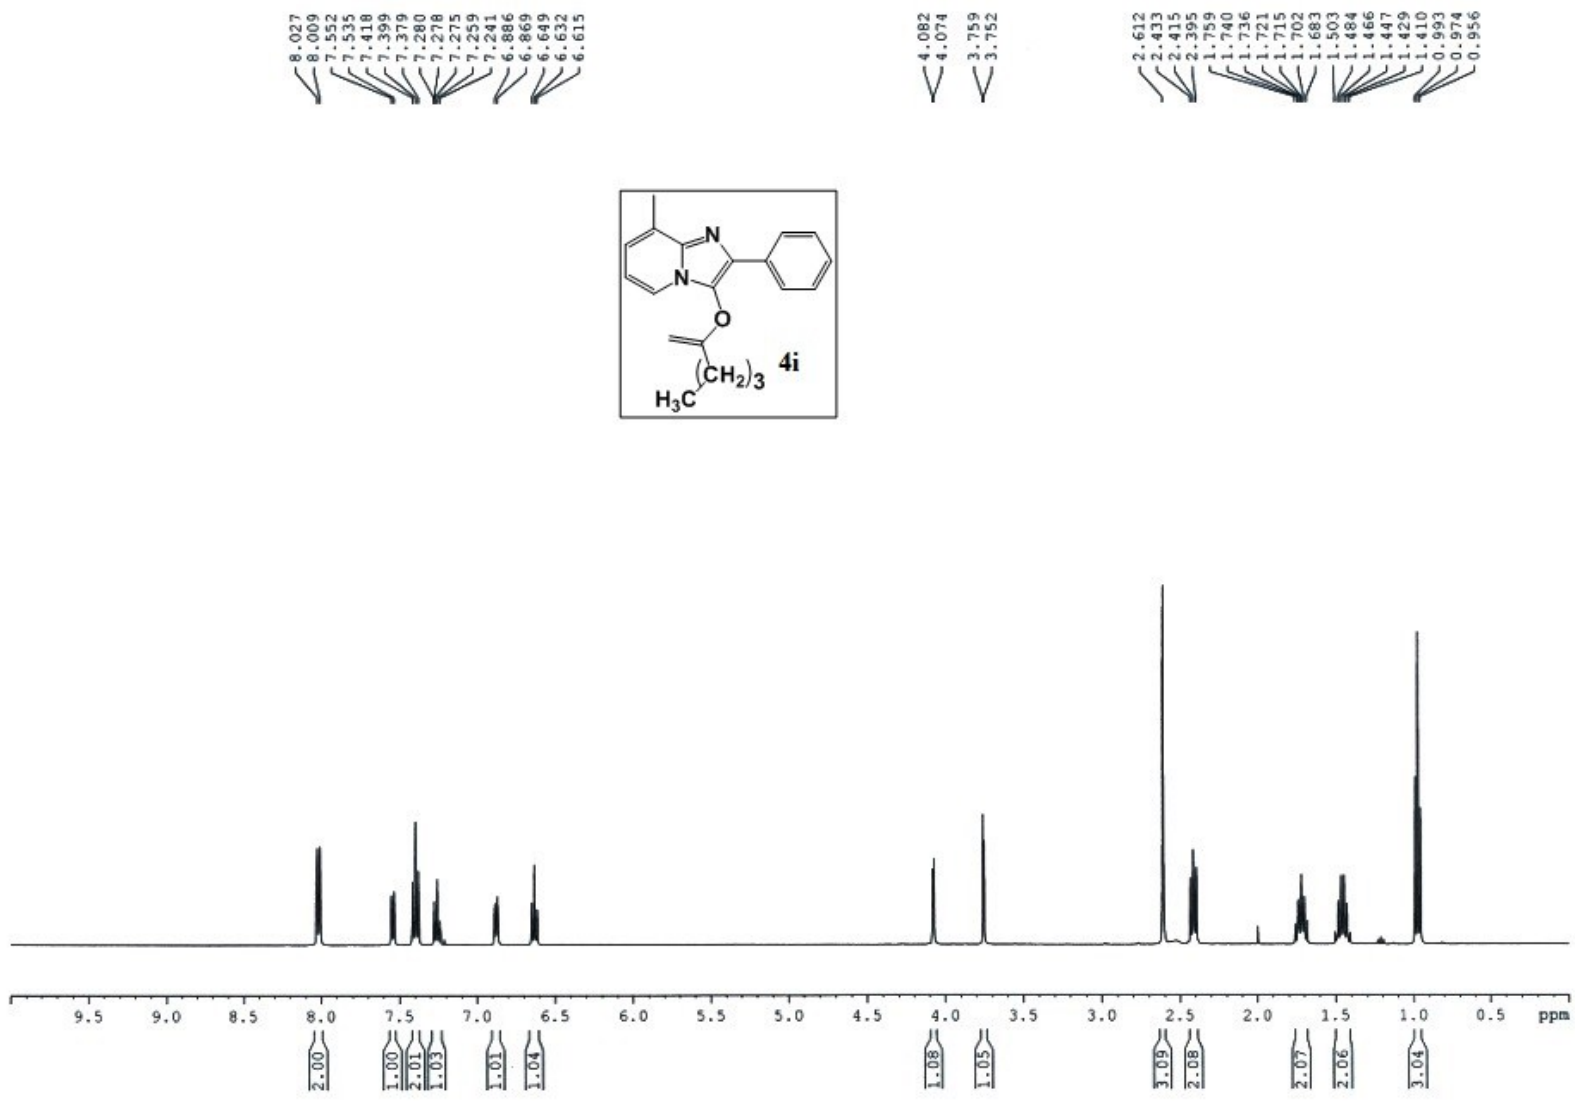

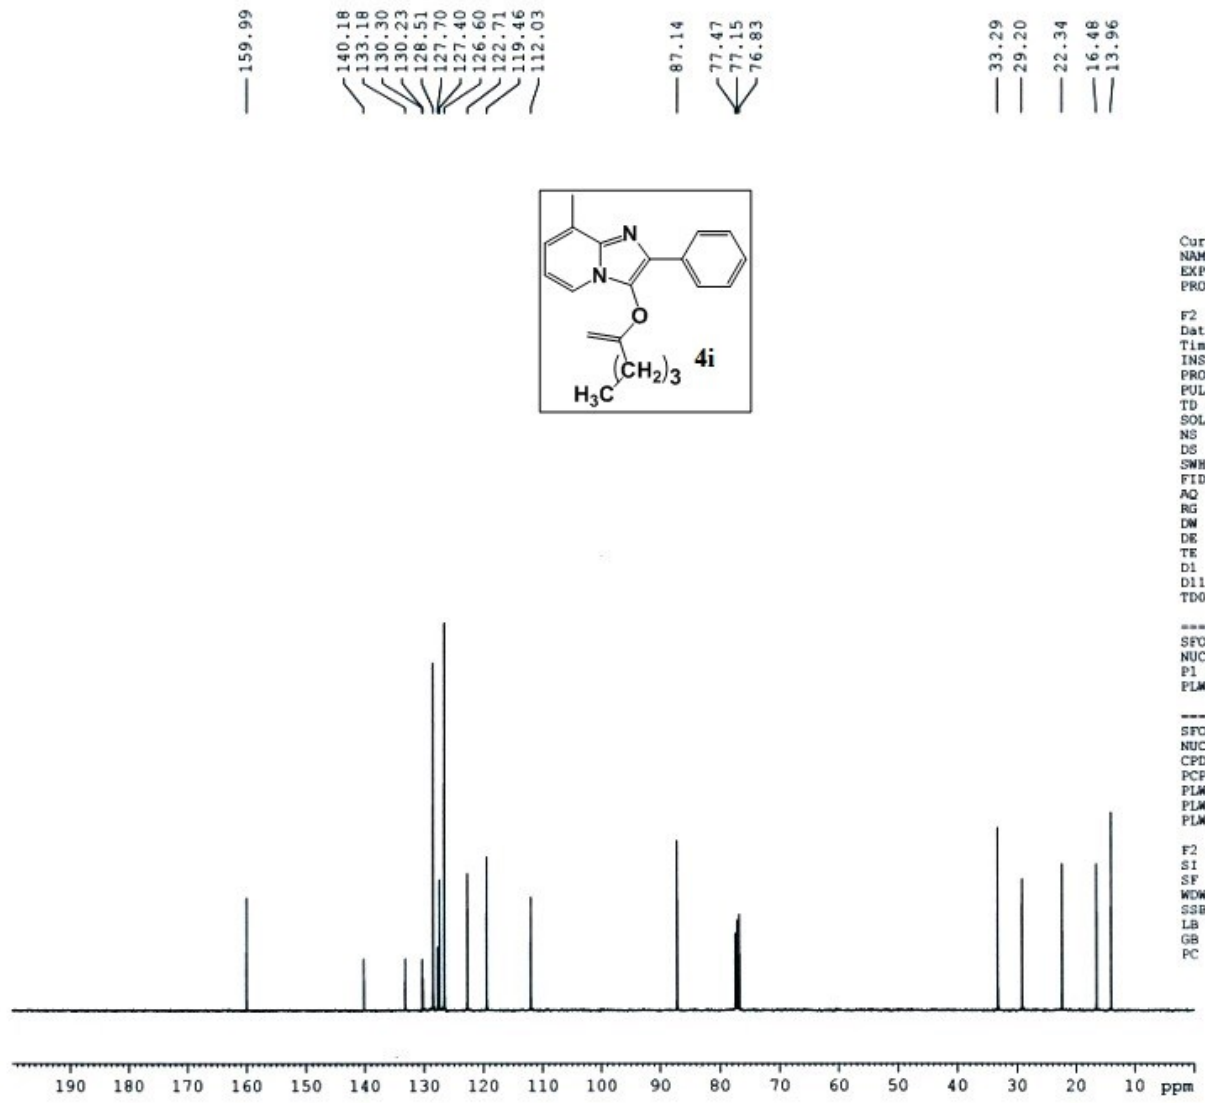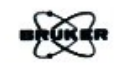

```

Current Data Parameters
NAME      Dr.A.HAJRA 2016
EXPNO    416
PROCNO   1

F2 - Acquisition Parameters
Date_    20160531
Time     11.23
INSTRUM  spect
PROBHD   5 mm PABBO BB/
PULPROG  zgpg30
TD       32768
SOLVENT  CDCl3
NS       220
DS       2
SWH      24038.461 Hz
FIDRES   0.733596 Hz
AQ       0.6815744 sec
RG       23.55
DM       20.800 usec
DE       6.50 usec
TE       298.0 K
D1       2.00000000 sec
D11      0.03000000 sec
TD0      1

----- CHANNEL f1 -----
SFO1    100.6276588 MHz
NUC1     13C
P1       8.90 usec
PLW1    54.00000000 W

----- CHANNEL f2 -----
SFO2    400.1516006 MHz
NUC2     1H
CPDPRG2  waltz16
PCPD2    90.00 usec
PLW2    12.00000000 W
PLW12   0.32231000 W
PLW13   0.16212000 W

F2 - Processing parameters
SI       16384
SF       100.6177960 MHz
WDW      EM
SSB      0
LB       1.00 Hz
GB       0
PC       1.40

```

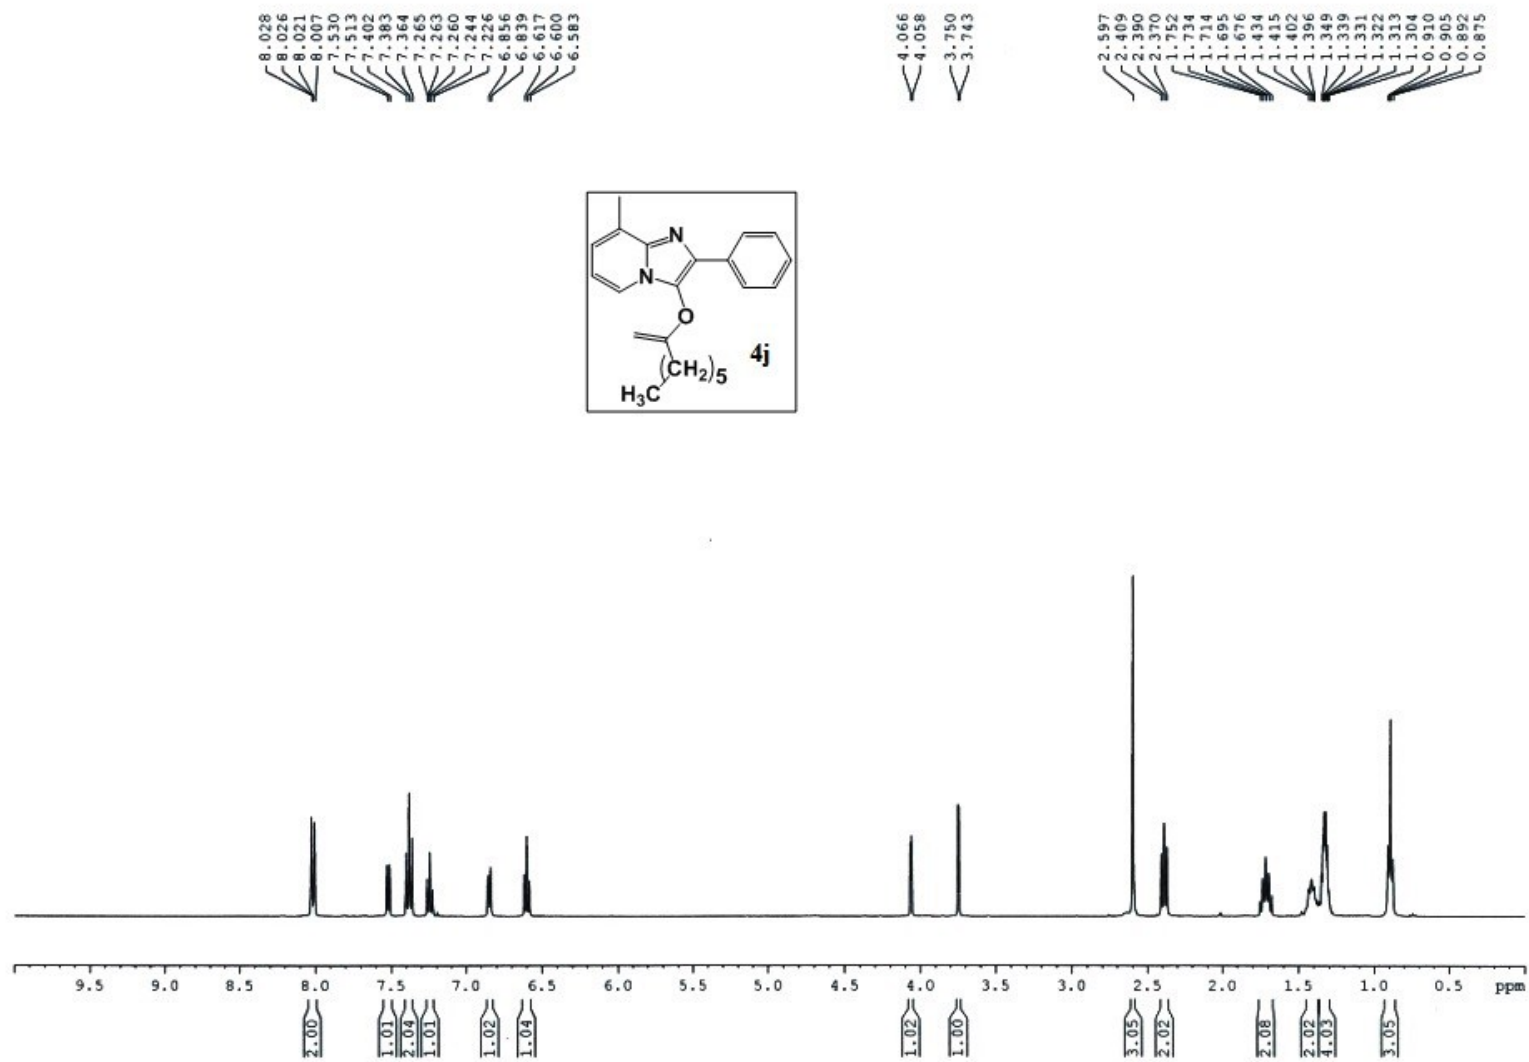

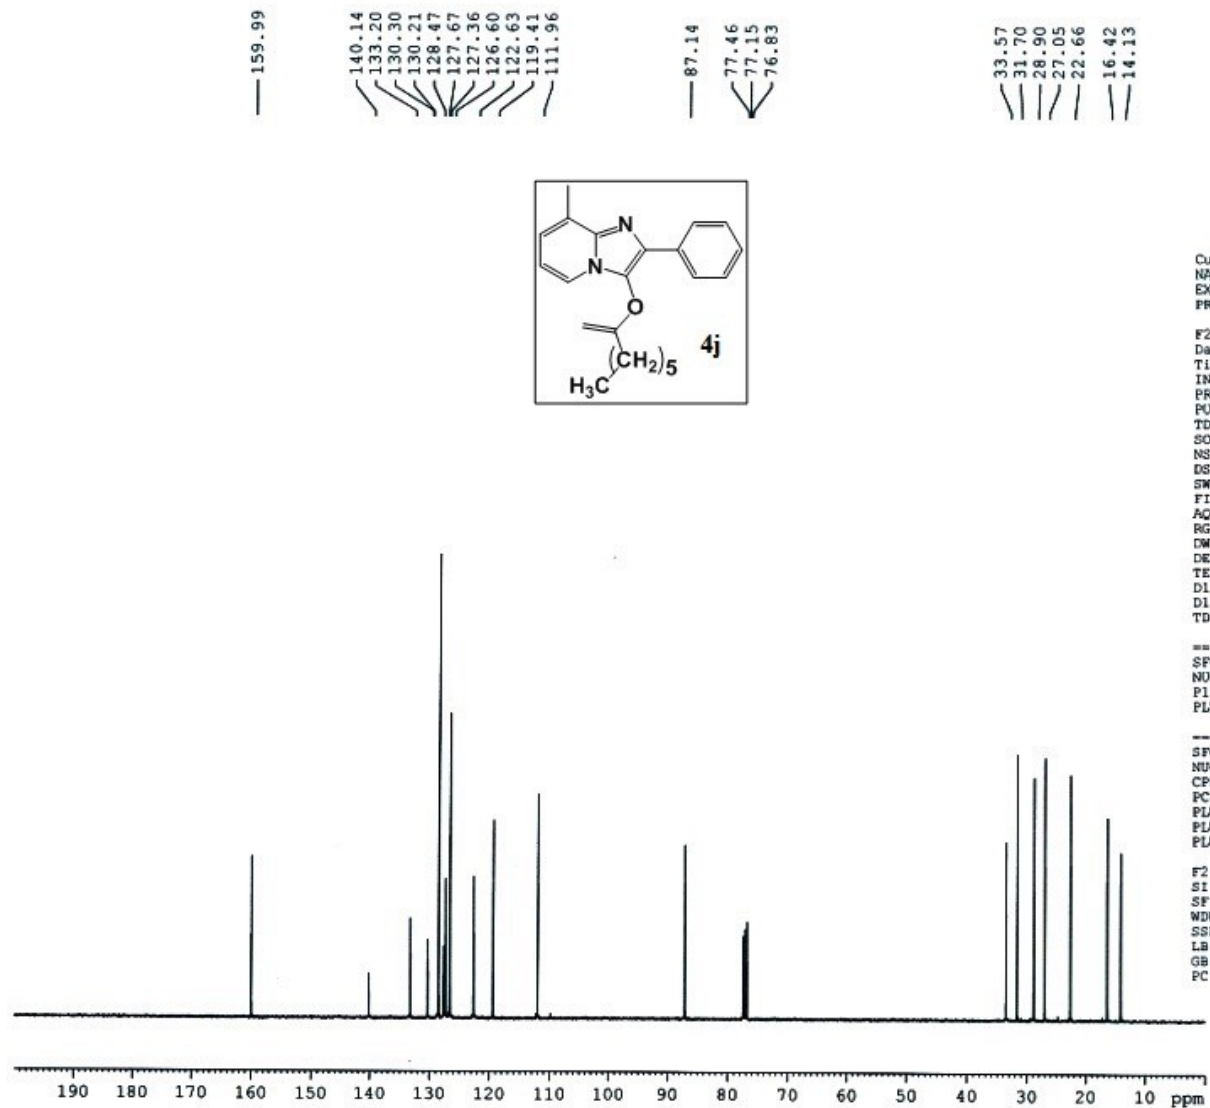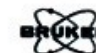

Current Data Parameters  
 NAME Dr.A.HAJRA 2016  
 EXPNO 412  
 PROCNO 1

F2 - Acquisition Parameters  
 Date 20160530  
 Time 15.18  
 INSTRUM spect  
 PROBHD 5 mm PABBO BB/  
 PULPROG zgpg30  
 TD 32768  
 SOLVENT CDCl3  
 NS 225  
 DS 2  
 SWH 24038.461 Hz  
 FIDRES 0.733596 Hz  
 AQ 0.6813744 sec  
 RG 11.51  
 DW 20.800 usec  
 DE 6.50 usec  
 TE 301.3 K  
 D1 2.00000000 sec  
 D11 0.03000000 sec  
 TDO 1

----- CHANNEL f1 -----  
 SFO1 100.6278588 MHz  
 NUC1 13C  
 P1 8.90 usec  
 PLW1 54.00000000 W

----- CHANNEL f2 -----  
 SFO2 400.1516006 MHz  
 NUC2 1H  
 CPDPRG2 waltz16  
 PCPD2 90.00 usec  
 PLW2 12.00000000 W  
 PLW12 0.32231000 W  
 PLW13 0.16212000 W

F2 - Processing parameters  
 SI 16384  
 SF 100.6177990 MHz  
 WDM EM  
 SSB 0  
 LB 1.00 Hz  
 GB 0  
 PC 1.40



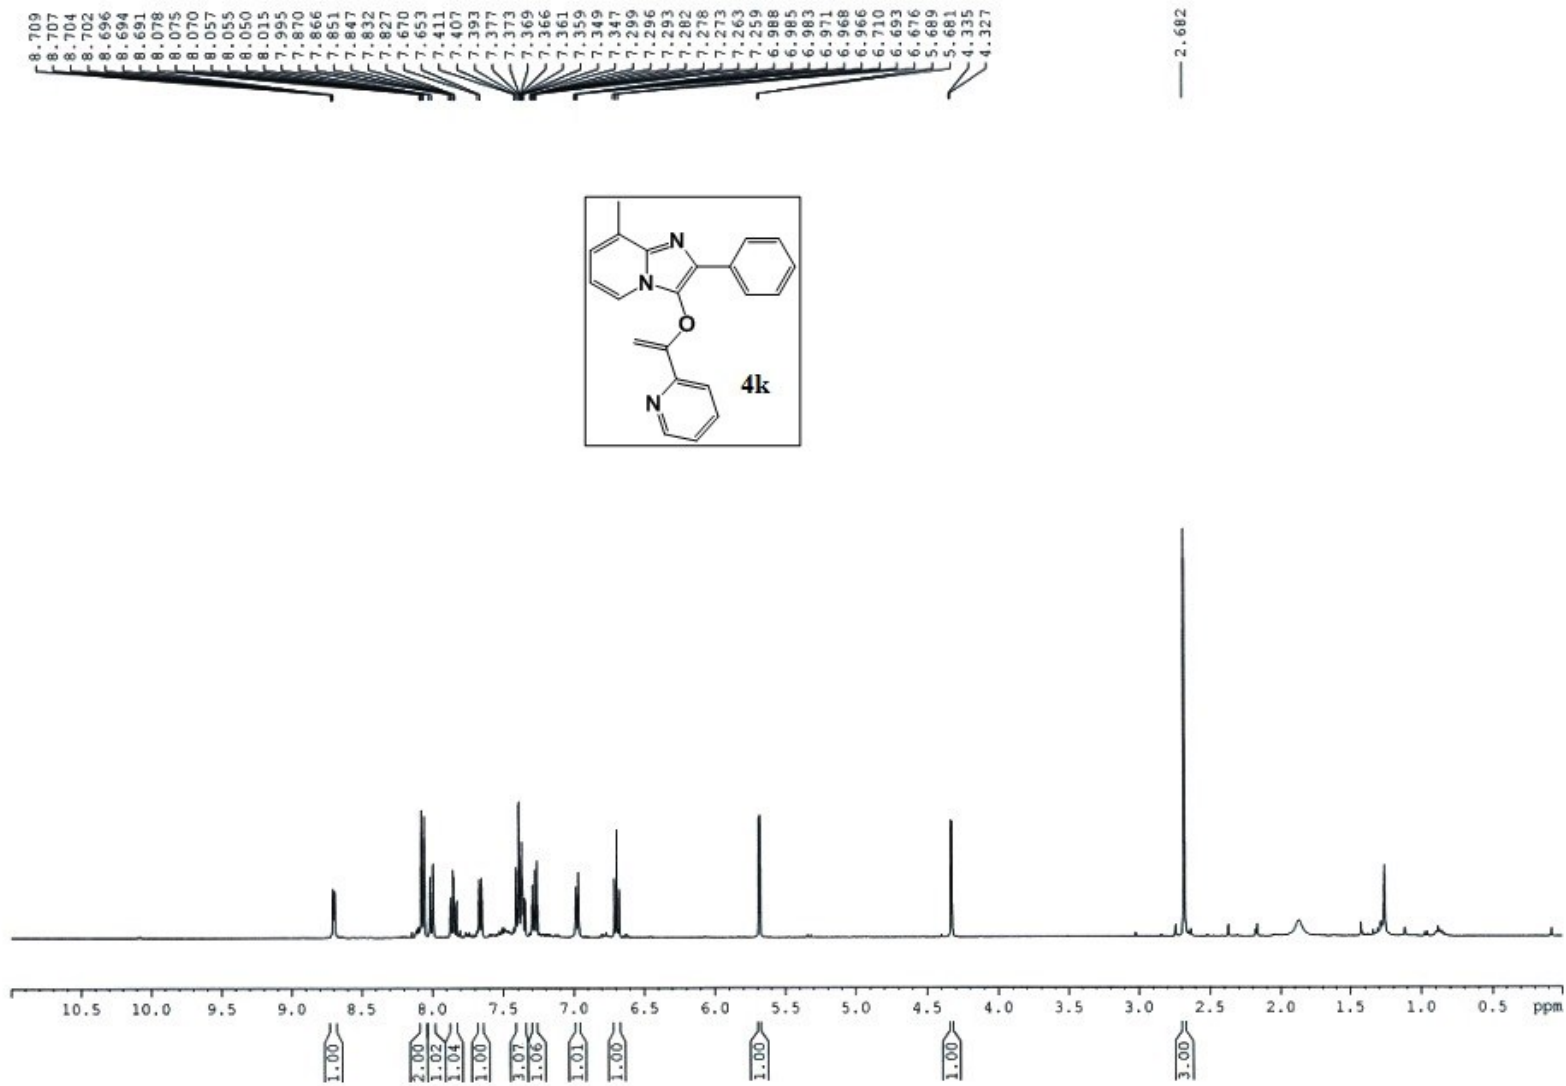

155.48  
151.33  
149.80  
140.48  
137.16  
132.99  
130.77  
129.91  
128.73  
128.37  
127.96  
127.67  
126.67  
124.09  
123.13  
119.60  
112.38

91.24

77.47  
77.15  
76.83

16.58

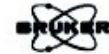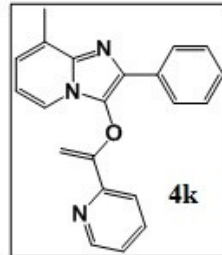

Current Data Parameters  
NAME Dr.A.HAJRA 2016  
EXPNO 540  
PROCNO 1

F2 - Acquisition Parameters  
Date\_ 20160620  
Time 21.04  
INSTRUM spect  
PROBHD 5 mm PABBO BB/  
PULPROG zgpg30  
TD 32768  
SOLVENT CDCl3  
NS 400  
DS 2  
SWH 24038.461 Hz  
FIDRES 0.733596 Hz  
AQ 0.6815744 sec  
RG 93.46  
DW 20.800 usec  
DE 6.50 usec  
TE 298.7 K  
D1 2.0000000 sec  
D11 0.0300000 sec  
TDO 1

----- CHANNEL f1 -----  
SFO1 100.6278588 MHz  
NUC1 13C  
P1 8.90 usec  
PLM1 54.0000000 W

----- CHANNEL f2 -----  
SFO2 400.1516006 MHz  
NUC2 1H  
CPDPRG2 waltz16  
PCPD2 90.00 usec  
PLM2 12.0000000 W  
PLM12 0.32231000 W  
PLM13 0.16212000 W

F2 - Processing parameters  
SI 16384  
SF 100.6177858 MHz  
WDW EM  
SSB 0  
LB 1.00 Hz  
GB 0  
PC 1.40

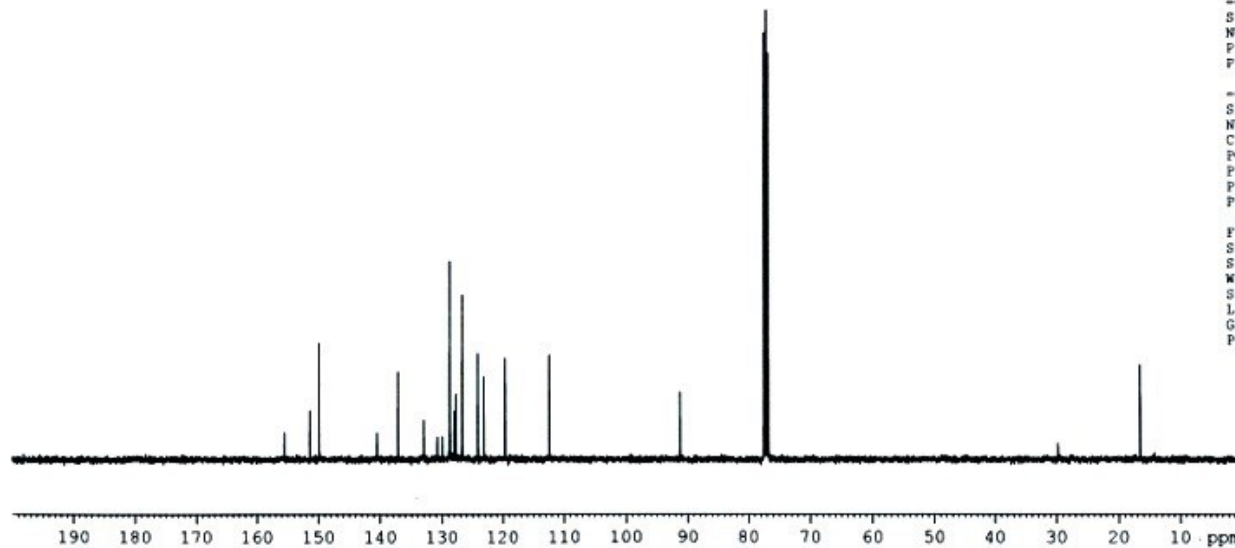

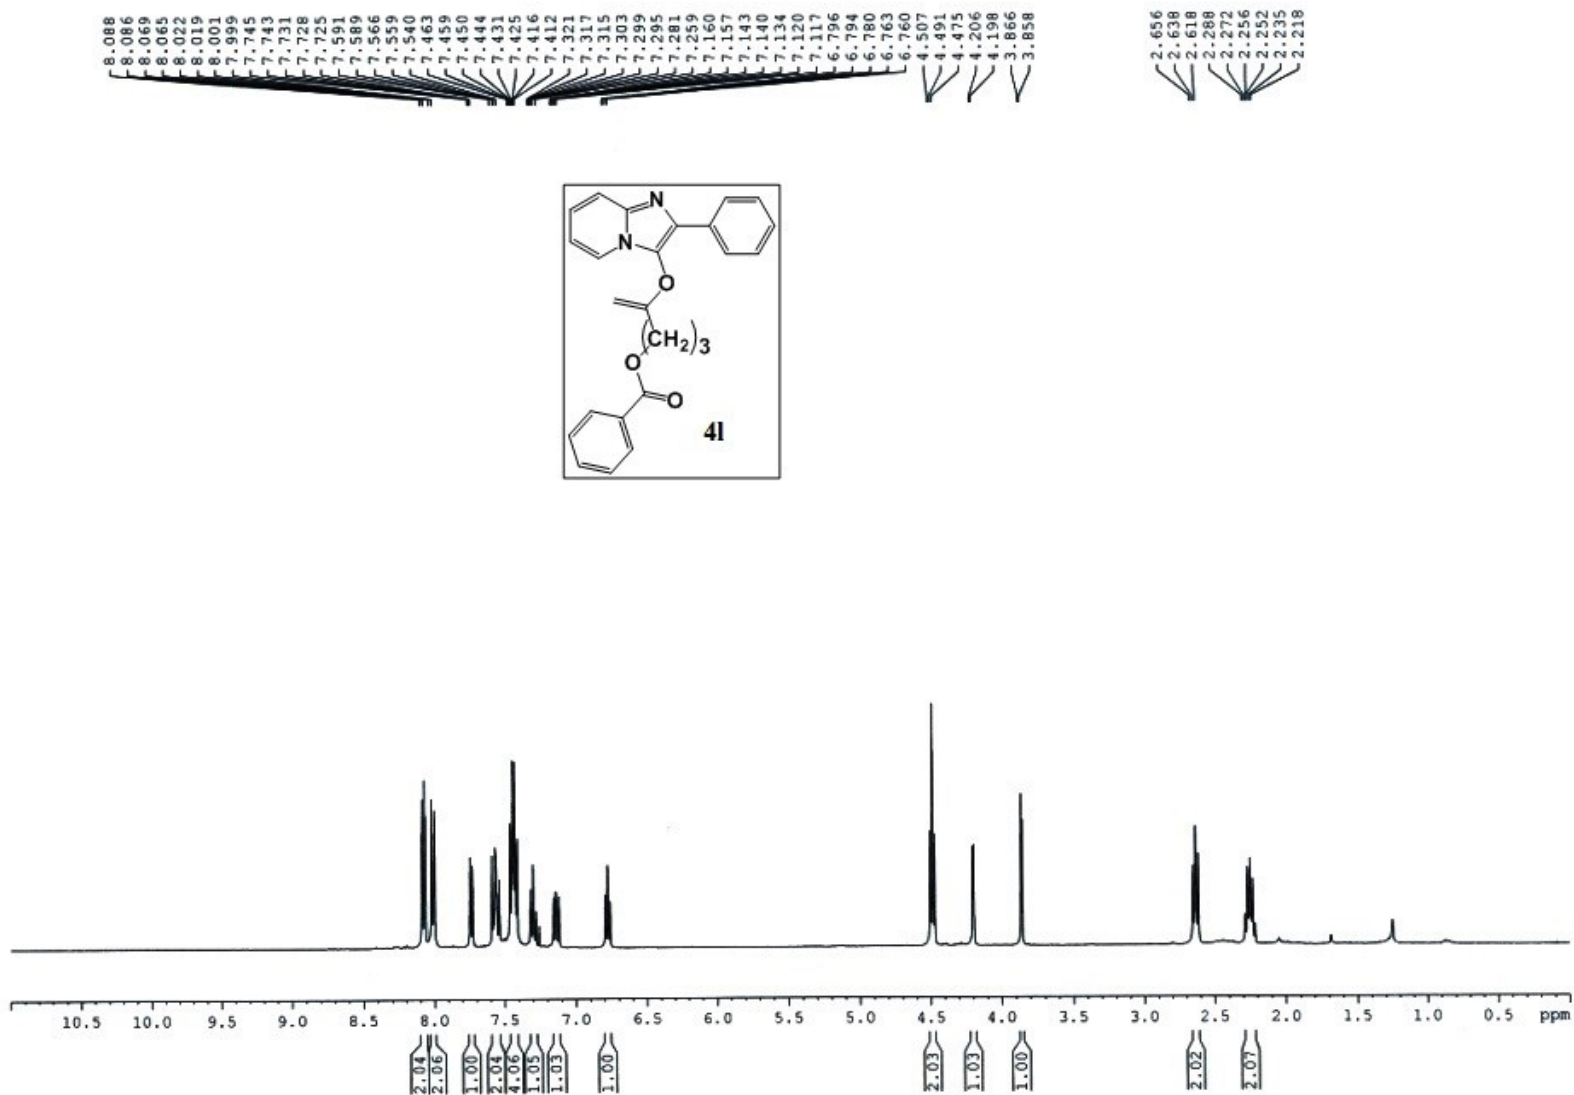

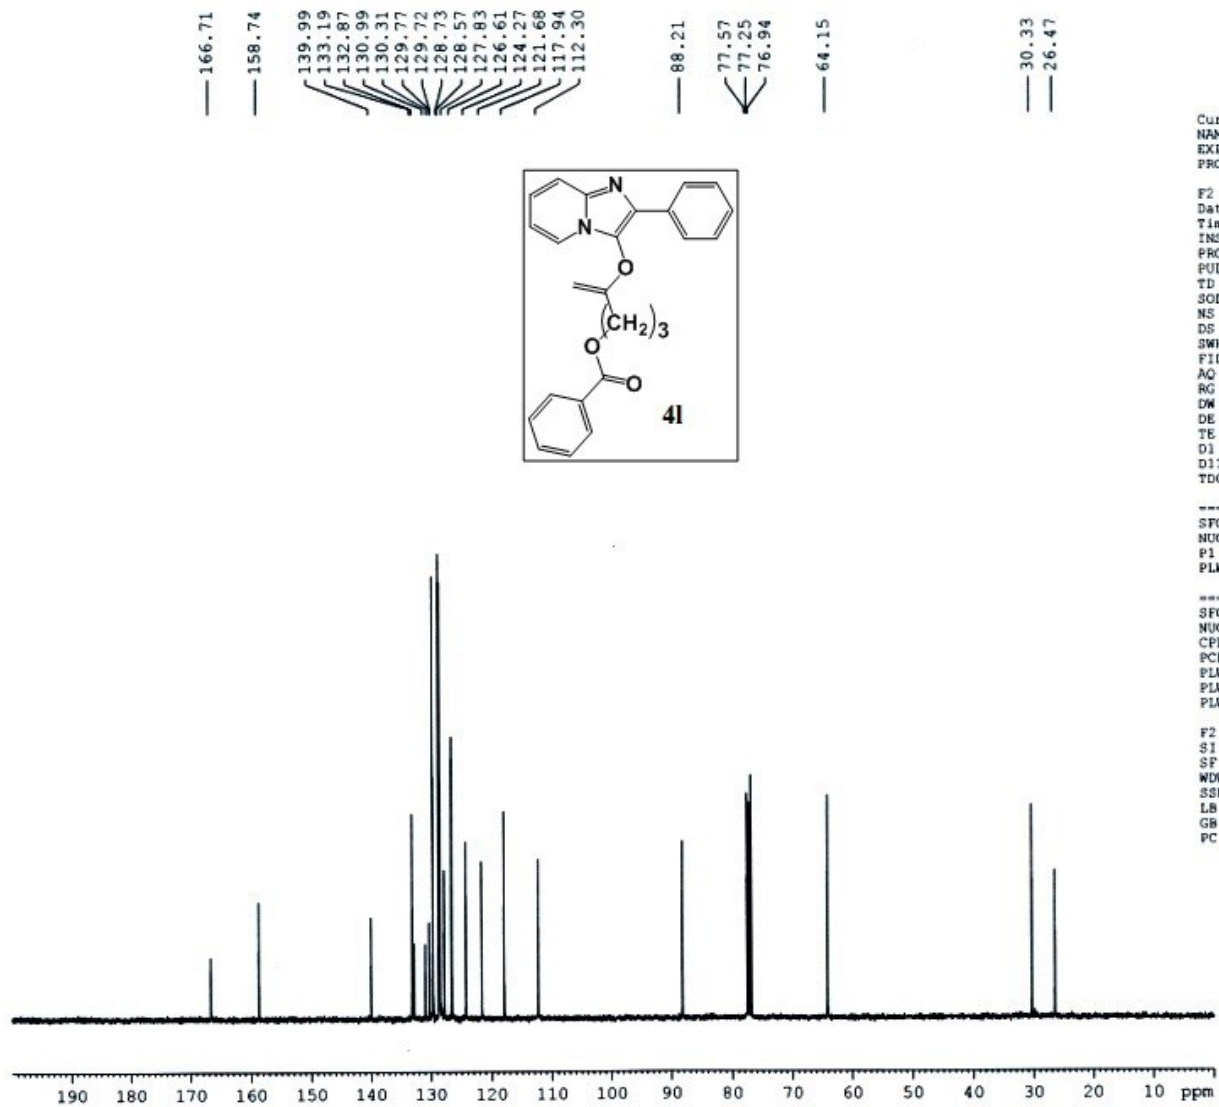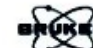

Current Data Parameters  
 NAME Dr.A.HAJRA 2016  
 EXPNO 520  
 PROCNO 1

F2 - Acquisition Parameters  
 Date\_ 20160617  
 Time 12.59  
 INSTRUM spect  
 PROBHD 5 mm PABBO BB/  
 PULPROG zgpg30  
 TD 32768  
 SOLVENT CDC13  
 NS 256  
 DS 2  
 SWH 24038.461 Hz  
 FIDRES 0.733596 Hz  
 AQ 0.6815744 sec  
 RG 19.02  
 DW 20.800 usec  
 DE 6.50 usec  
 TE 297.3 K  
 D1 2.00000000 sec  
 D11 0.03000000 sec  
 TDO 1

----- CHANNEL f1 -----  
 SFO1 100.6278588 MHz  
 NUC1 13C  
 P1 8.90 usec  
 PLW1 54.00000000 W

----- CHANNEL f2 -----  
 SFO2 400.1516006 MHz  
 NUC2 1H  
 CPDPRG2 waltz16  
 PCPD2 90.00 usec  
 PLW2 12.00000000 W  
 PLW12 0.32231000 W  
 PLW13 0.16212000 W

F2 - Processing parameters  
 S1 16384  
 SF 100.6177854 MHz  
 WDW EM  
 SSB 0  
 LB 1.00 Hz  
 GB 0  
 PC 1.40

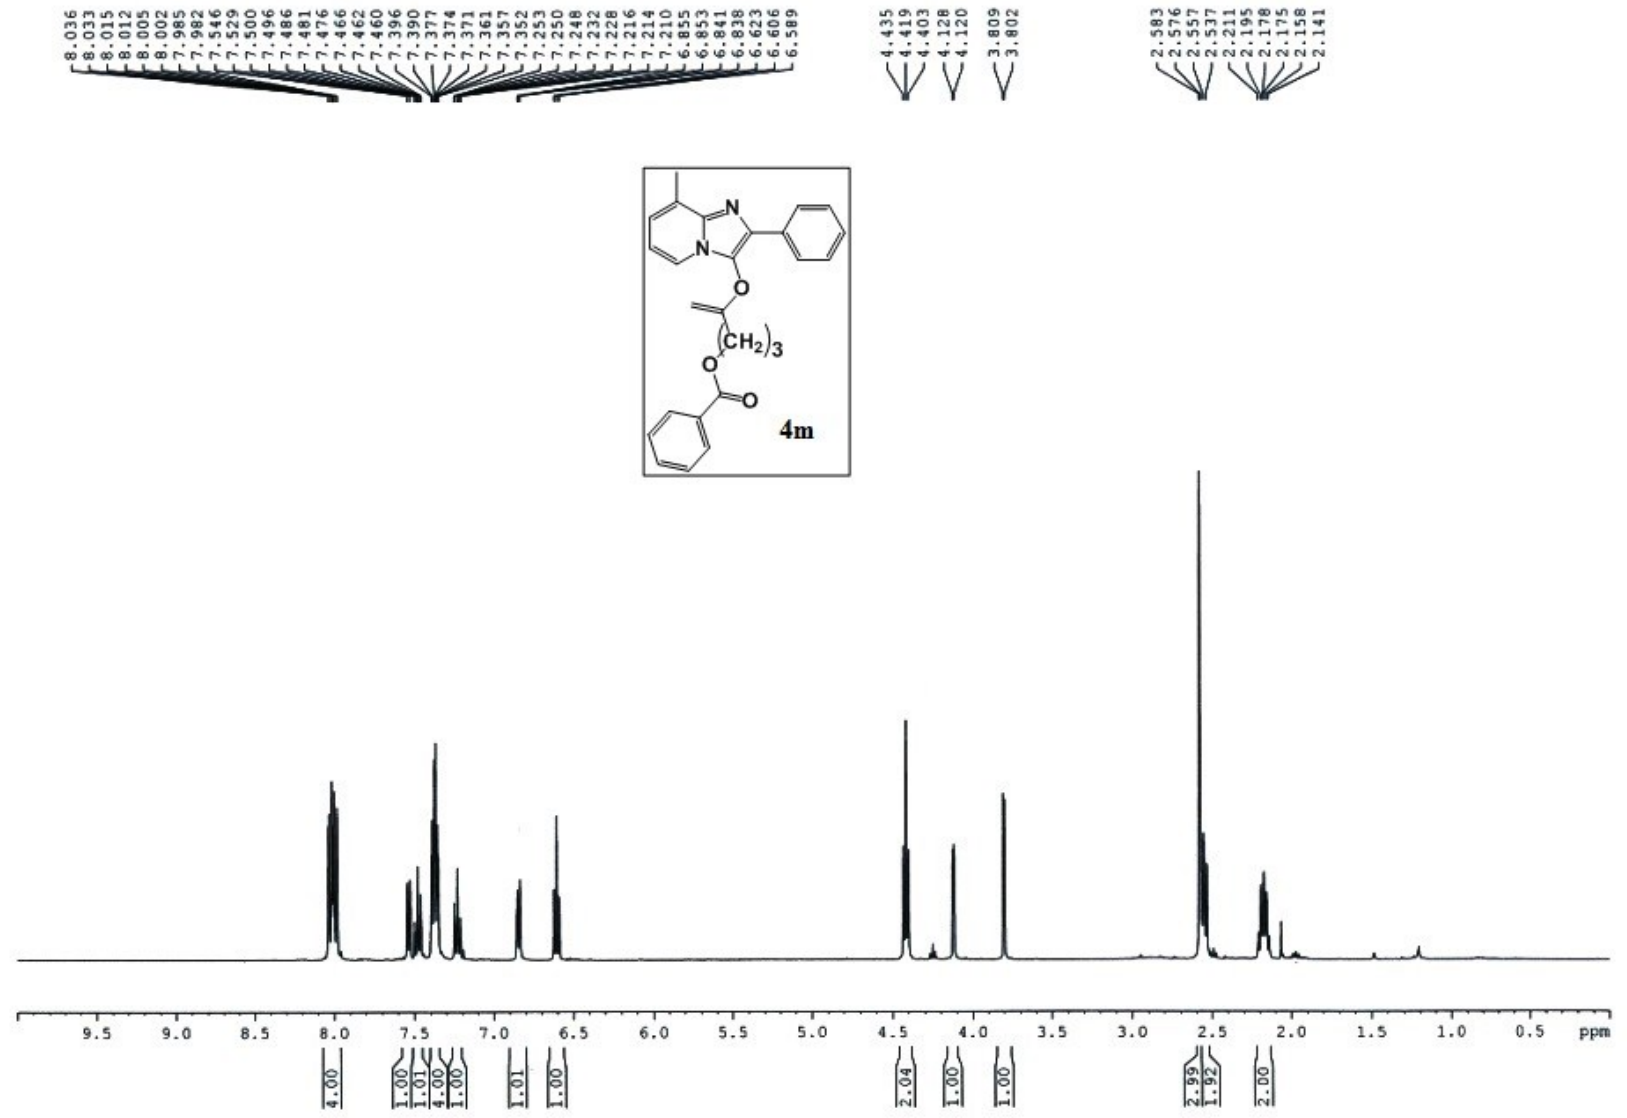

— 166.47  
 — 158.67  
 140.11  
 133.00  
 132.96  
 130.27  
 130.13  
 129.88  
 129.51  
 128.49  
 128.36  
 127.60  
 127.44  
 126.52  
 122.74  
 119.32  
 112.10  
 — 87.93  
 77.47  
 77.15  
 76.84  
 — 63.97  
 — 30.13  
 — 26.25  
 — 16.38

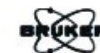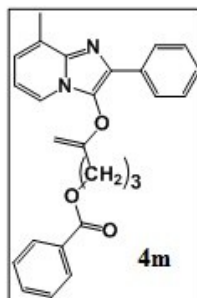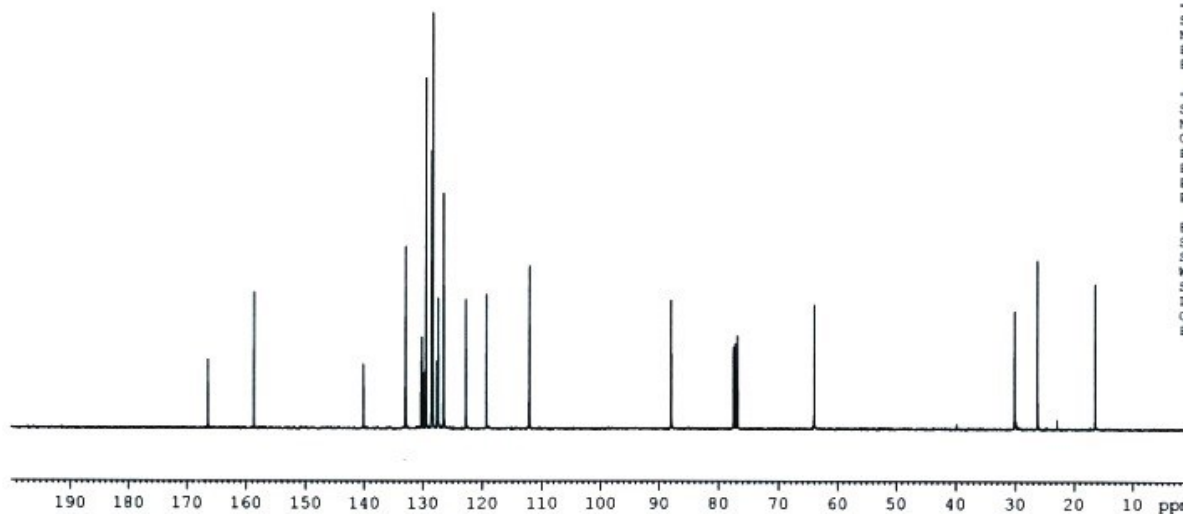

Current Data Parameters  
 NAME Dr.A.HAJRA 2016  
 EXPNO 515  
 PROCNO 1

F2 - Acquisition Parameters  
 Date\_ 20160616  
 Time 18.31  
 INSTRUM spect  
 PROBRD 5 mm PABBO BB/  
 PULPROG zgpg30  
 TD 32768  
 SOLVENT CDCl3  
 NS 240  
 DS 2  
 SWH 24039.461 Hz  
 FIDRES 0.733596 Hz  
 AQ 0.6815744 sec  
 RG 12.92  
 DW 20.800 usec  
 DE 6.50 usec  
 TE 298.5 K  
 D1 2.00000000 sec  
 D11 0.03000000 sec  
 TDO 1

----- CHANNEL f1 -----  
 SFO1 100.6278588 MHz  
 NUC1 13C  
 P1 8.90 usec  
 PLW1 54.00000000 W

----- CHANNEL f2 -----  
 SFO2 400.1516006 MHz  
 NUC2 1H  
 CPDPRG2 waltz16  
 PCPD2 90.00 usec  
 PLW2 12.00000000 W  
 PLW12 0.32231000 W  
 PLW13 0.16212000 W

F2 - Processing parameters  
 SI 16384  
 SF 100.6178072 MHz  
 WDW EM  
 SSB 0  
 LB 1.00 Hz  
 GB 0  
 PC 1.40

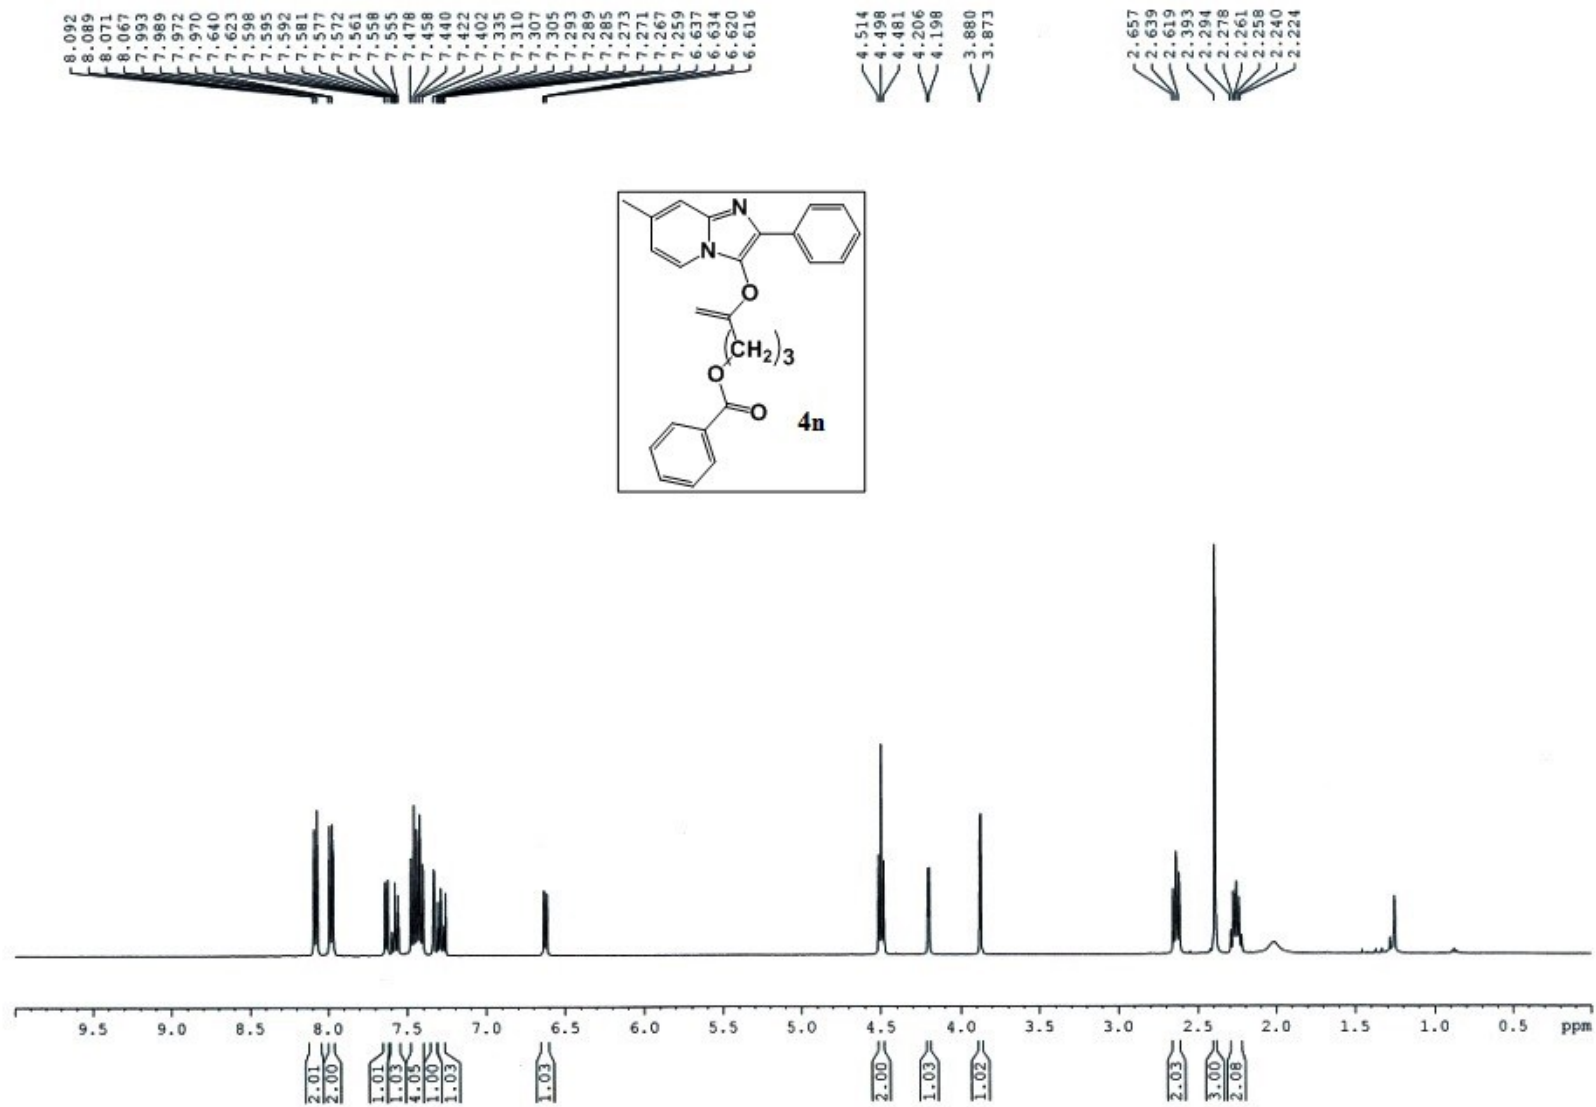

— 166.71  
 — 158.85  
 140.47  
 135.18  
 133.16  
 133.01  
 130.44  
 130.31  
 129.71  
 129.45  
 128.66  
 128.55  
 127.61  
 126.50  
 120.91  
 116.27  
 114.93  
 — 88.12  
 77.47  
 77.15  
 76.84  
 — 64.15  
 — 30.32  
 — 26.47  
 — 21.51

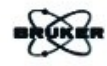

Current Data Parameters  
 NAME Dr.A.HAJRA 2016  
 EXPNO 513  
 PROCNO 1  
 F2 - Acquisition Parameters  
 Date\_ 20160616  
 Time 18.00  
 INSTRUM spect  
 PROBHD 5 mm PABBO BB/  
 PULPROG zgpg30  
 TD 32768  
 SOLVENT CDCl3  
 NS 400  
 DS 2  
 SWH 24038.461 Hz  
 FIDRES 0.733596 Hz  
 AQ 0.6815744 sec  
 RG 93.46  
 DW 20.800 usec  
 DE 6.50 usec  
 TE 298.4 K  
 D1 2.0000000 sec  
 D11 0.0300000 sec  
 TDO 1

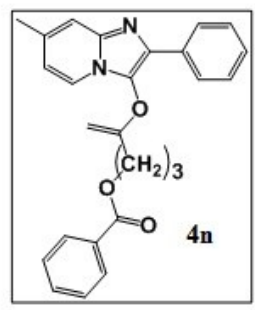

----- CHANNEL f1 -----  
 SFO1 100.6278588 MHz  
 NUC1 13C  
 P1 8.90 usec  
 PLW1 54.0000000 W  
 ----- CHANNEL f2 -----  
 SFO2 400.1516006 MHz  
 NUC2 1H  
 CPDPRG12 waltz16  
 PCPD2 90.00 usec  
 PLW2 12.0000000 W  
 PLW12 0.32231000 W  
 PLW13 0.16212000 W  
 F2 - Processing parameters  
 SI 16384  
 SF 100.6177867 MHz  
 WDW EM  
 SSB 0  
 LB 1.00 Hz  
 GB 0  
 PC 1.40

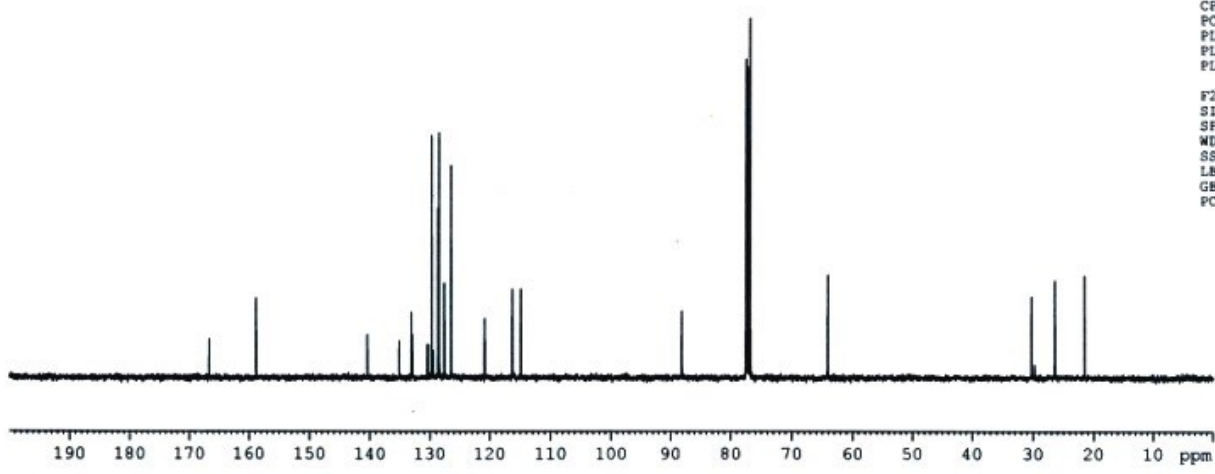



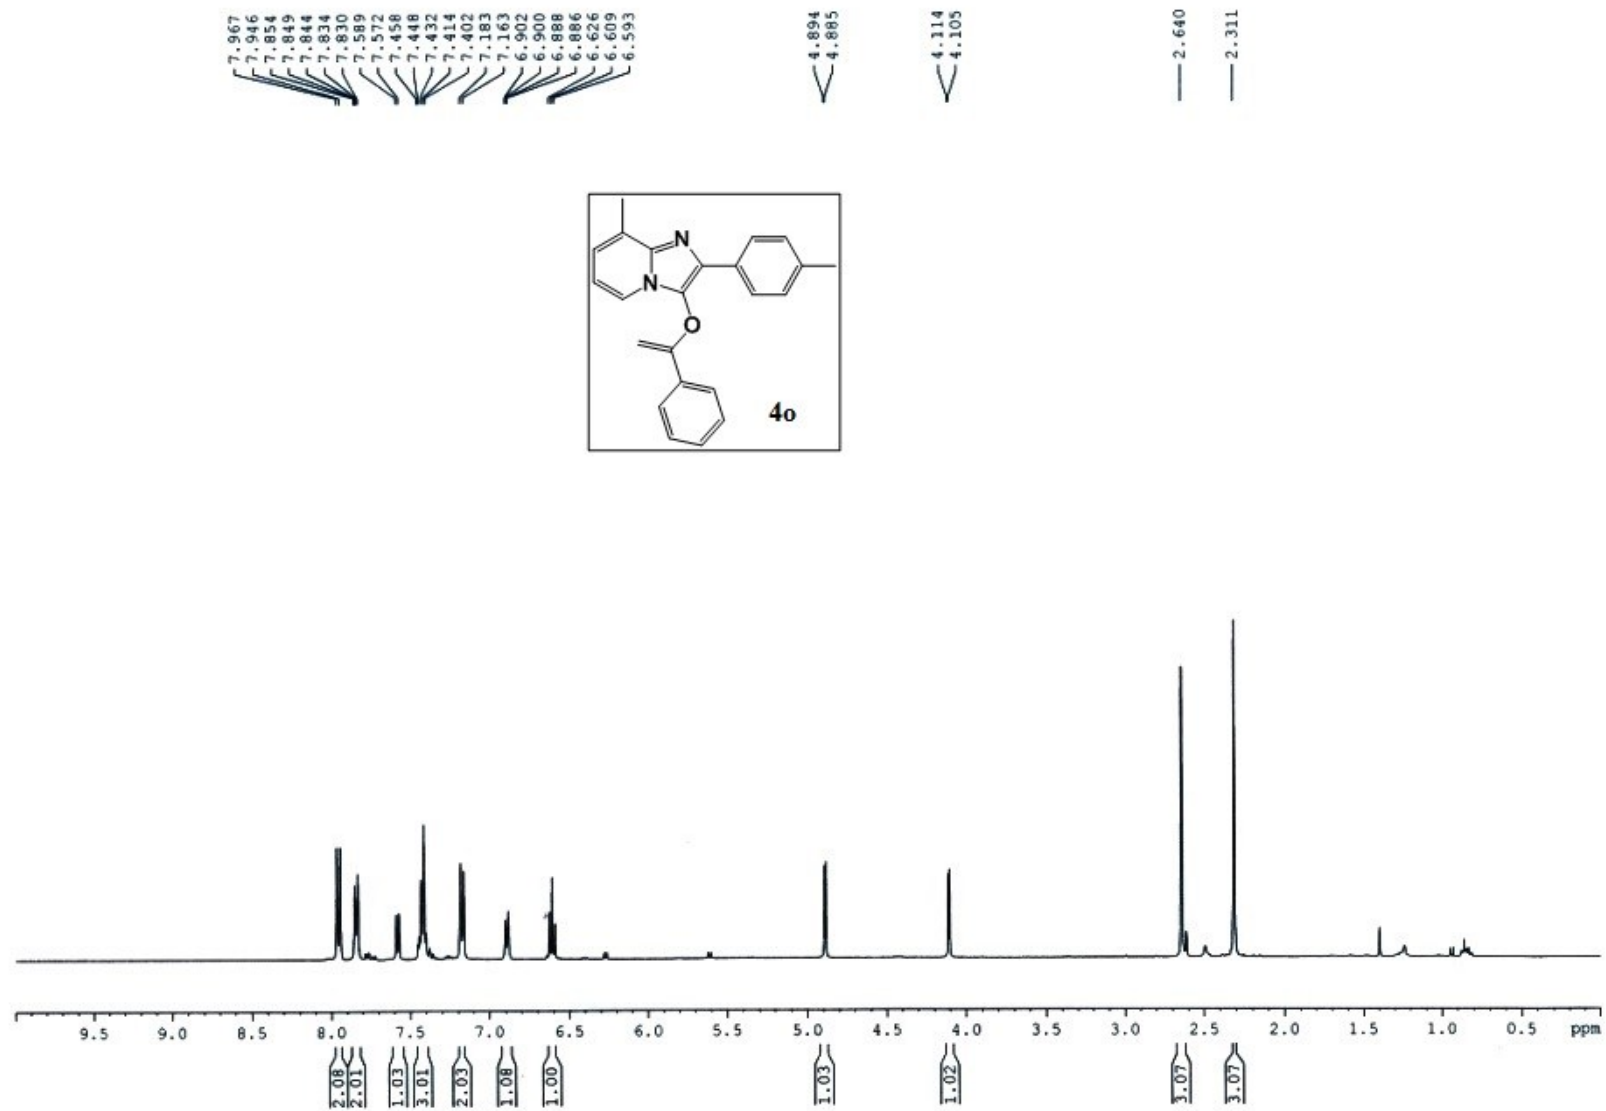

156.21  
 140.26  
 137.28  
 133.65  
 130.85  
 130.17  
 129.66  
 129.47  
 129.38  
 128.68  
 127.67  
 126.43  
 125.44  
 122.85  
 119.38  
 112.14

87.95

77.47  
 77.15  
 76.83

21.39  
 16.53

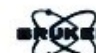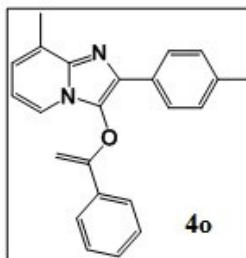

Current Data Parameters  
 NAME Dr.A.HAJRA 2017  
 EXPNO 1061  
 PROCNO 1

F2 - Acquisition Parameters  
 Date\_ 20170621  
 Time 11.47  
 INSTRUM spect  
 PROBHD 5 mm PABBO BB/  
 PULPROG zgpg30  
 TD 32768  
 SOLVENT CDCl3  
 NS 60  
 DS 2  
 SWH 24038.461 Hz  
 FIDRES 0.733596 Hz  
 AQ 0.6815744 sec  
 RG 19.02  
 DW 20.800 usec  
 DE 6.50 usec  
 TE 296.2 K  
 D1 2.0000000 sec  
 D11 0.0300000 sec  
 TD0 1

----- CHANNEL f1 -----  
 SFO1 100.6278588 MHz  
 NUC1 13C  
 P1 8.90 usec  
 PLW1 54.0000000 W

----- CHANNEL f2 -----  
 SFO2 400.1516006 MHz  
 NUC2 1H  
 CPDPRG2 waltz16  
 PCPD2 90.00 usec  
 PLW2 12.0000000 W  
 PLW12 0.32231000 W  
 PLW13 0.16212000 W

F2 - Processing parameters  
 SI 16384  
 SF 100.6177980 MHz  
 WDW EM  
 SSB 0  
 LB 1.00 Hz  
 GB 0  
 PC 1.40

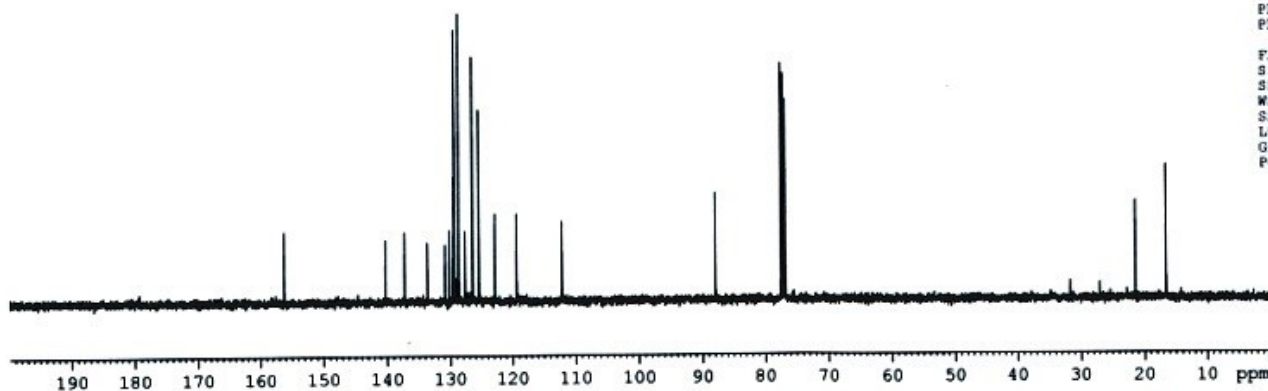

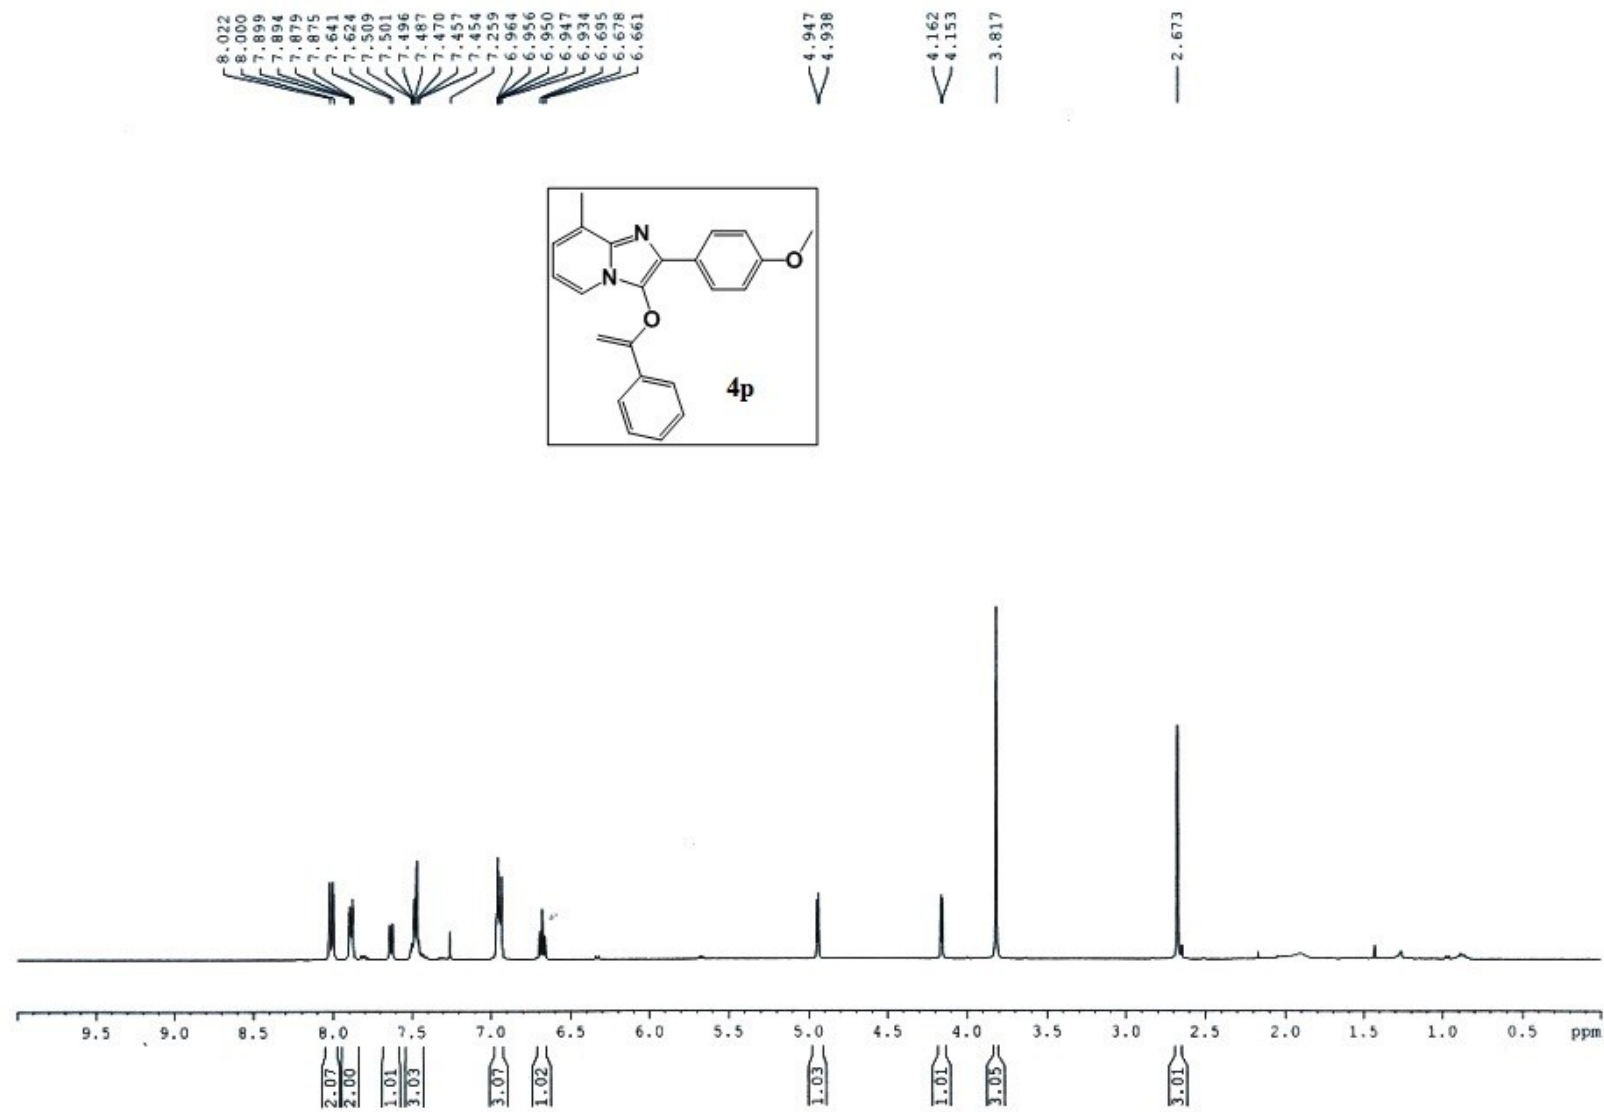

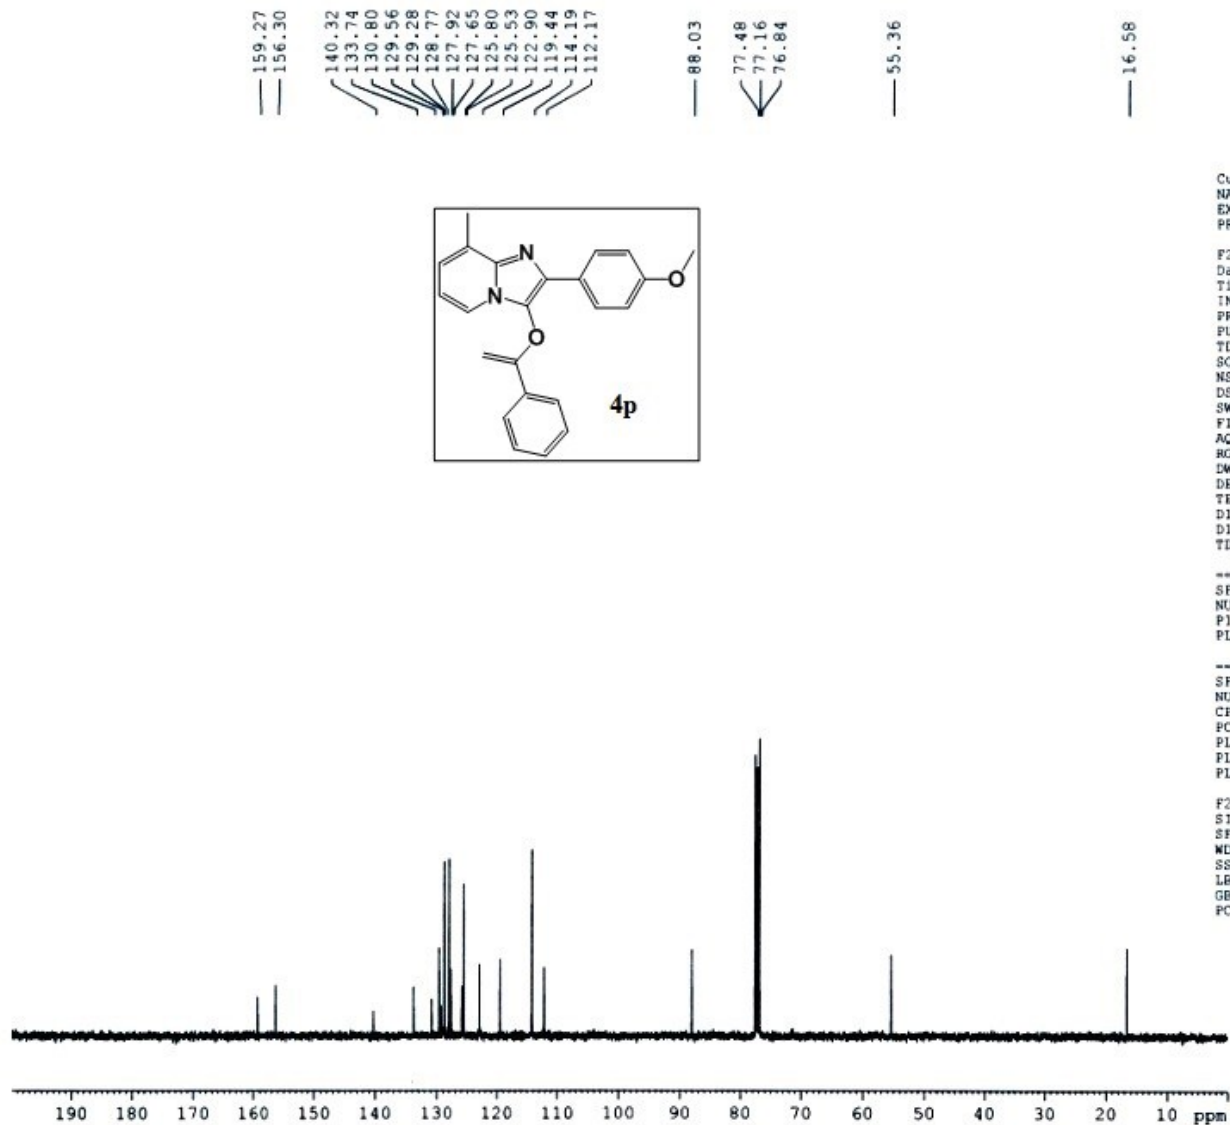

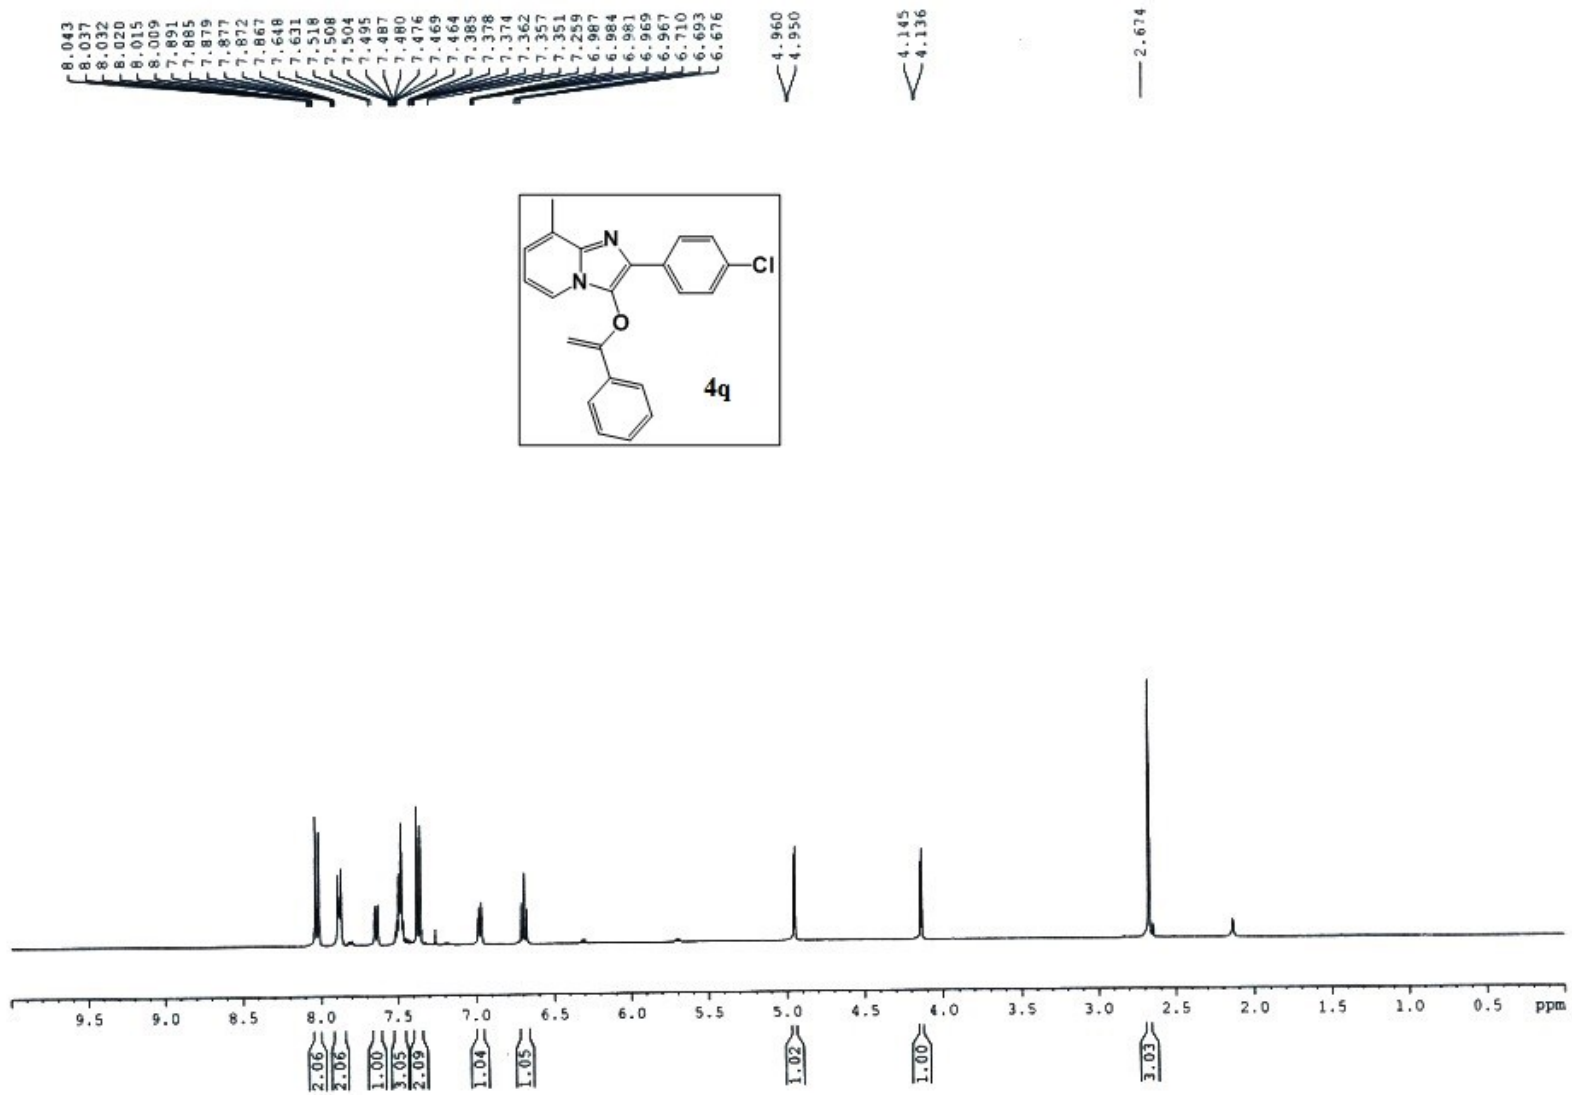

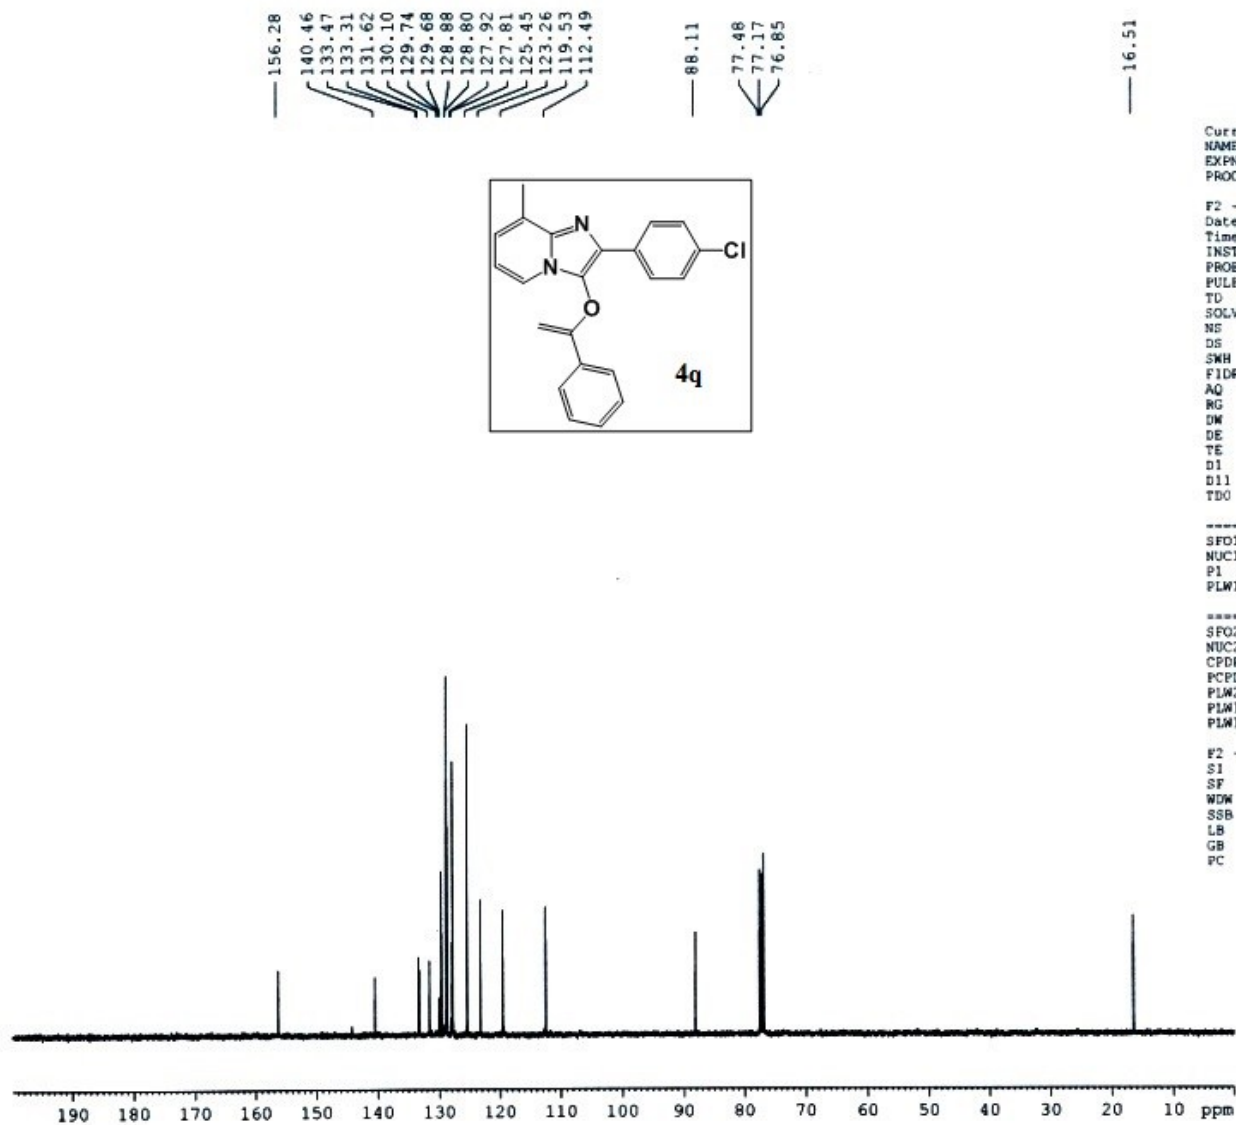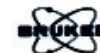

Current Data Parameters  
NAME Dr.A.MAJRA 2017  
EXPNO 1083  
PROCNO 1

F2 - Acquisition Parameters  
Date\_ 20170623  
Time 18.56  
INSTRUM spect  
PROBRD 5 mm PABBO BB/  
PULPROG zgpg30  
TD 32768  
SOLVENT CDCl3  
NS 100  
DS 2  
SWH 24036.461 Hz  
FIDRES 0.133596 Hz  
AQ 0.6815744 sec  
RG 40.87  
DW 20.800 usec  
DE 6.50 usec  
TE 298.5 K  
D1 2.00000000 sec  
D11 0.03000000 sec  
TD0 1

----- CHANNEL f1 -----  
SFO1 100.6278588 MHz  
NUC1 13C  
P1 8.90 usec  
PLW1 54.00000000 W

----- CHANNEL f2 -----  
SFO2 400.1516006 MHz  
NUC2 1H  
CPDPRG12 waltz16  
PCPD2 90.00 usec  
PLW2 12.00000000 W  
PLW12 0.32231000 W  
PLW13 0.16212000 W

F2 - Processing parameters  
SI 16384  
SF 100.6177899 MHz  
WDW EM  
SSB 0  
LB 1.00 Hz  
GB 0  
PC 1.40

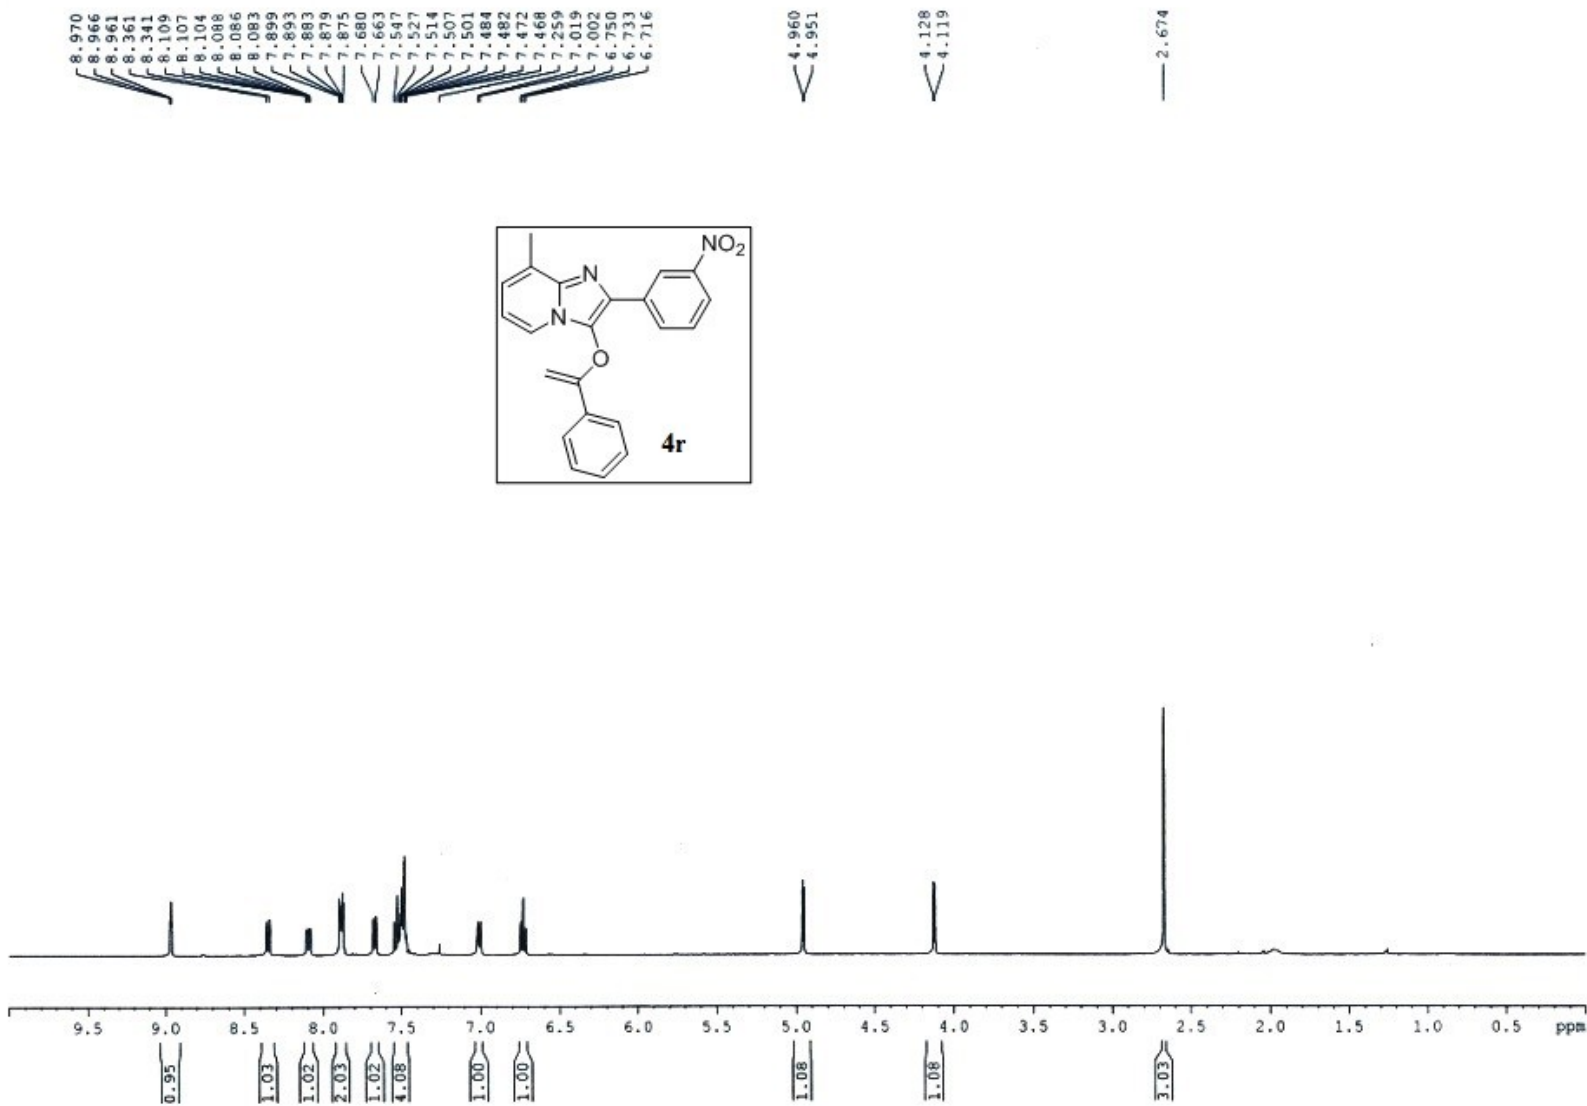

156.61  
148.79  
140.66  
134.96  
133.24  
132.09  
130.87  
129.83  
129.58  
128.85  
128.41  
128.24  
125.54  
123.69  
122.03  
121.41  
119.68  
112.88

88.26

77.48  
77.16  
76.84

16.47

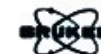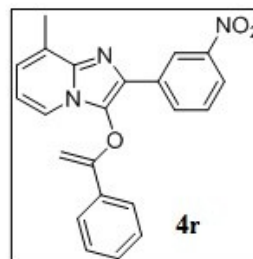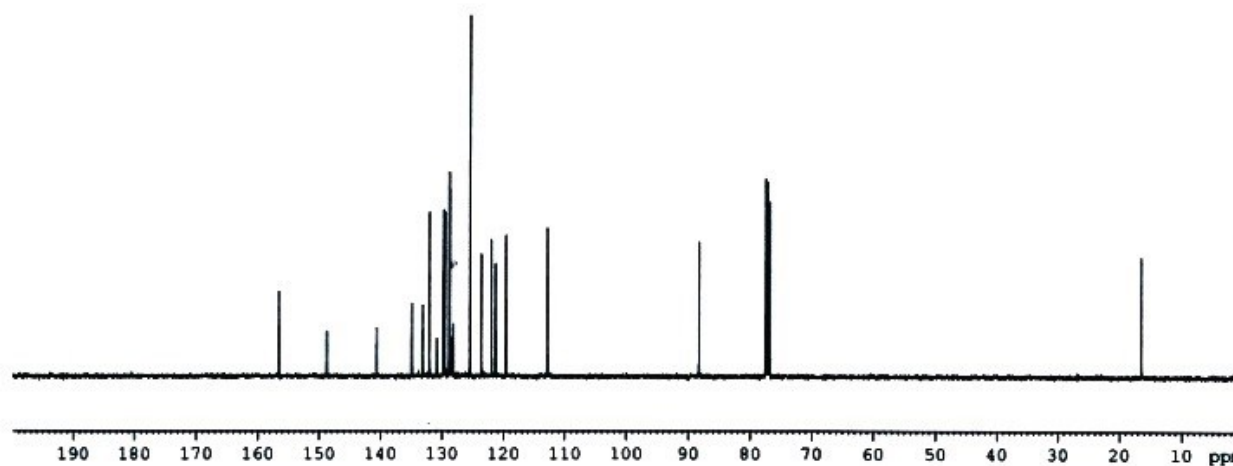

Current Data Parameters  
NAME Dr.A.RAJRA 2017  
EXPNO 1106  
PROCNO 1

F2 - Acquisition Parameters  
Date\_ 20170626  
Time 19.12  
INSTRUM spect  
PROBHD 5 mm F4BBO BB/  
PULPROG zgpg30  
TD 32768  
SOLVENT cdcl3  
NS 220  
DS 2  
SWH 24038.461 Hz  
FIDRES 0.733596 Hz  
AQ 0.6815744 sec  
RG 37.83  
DW 20.800 usec  
DE 6.50 usec  
TE 298.9 K  
D1 2.0000000 sec  
D11 0.0300000 sec  
TD0 1

----- CHANNEL f1 -----  
SFO1 100.6278588 MHz  
NUC1 13C  
P1 8.90 usec  
PLW1 54.0000000 W

----- CHANNEL f2 -----  
SFO2 400.1516006 MHz  
NUC2 1H  
CPDPRG12 waltz16  
PCPD2 90.00 usec  
PLW2 12.0000000 W  
PLW12 0.32231000 W  
PLW13 0.16212000 W

F2 - Processing parameters  
SI 16384  
SF 100.6177897 MHz  
WDM EM  
SSB 0  
LB 1.00 Hz  
GB 0  
PC 1.40



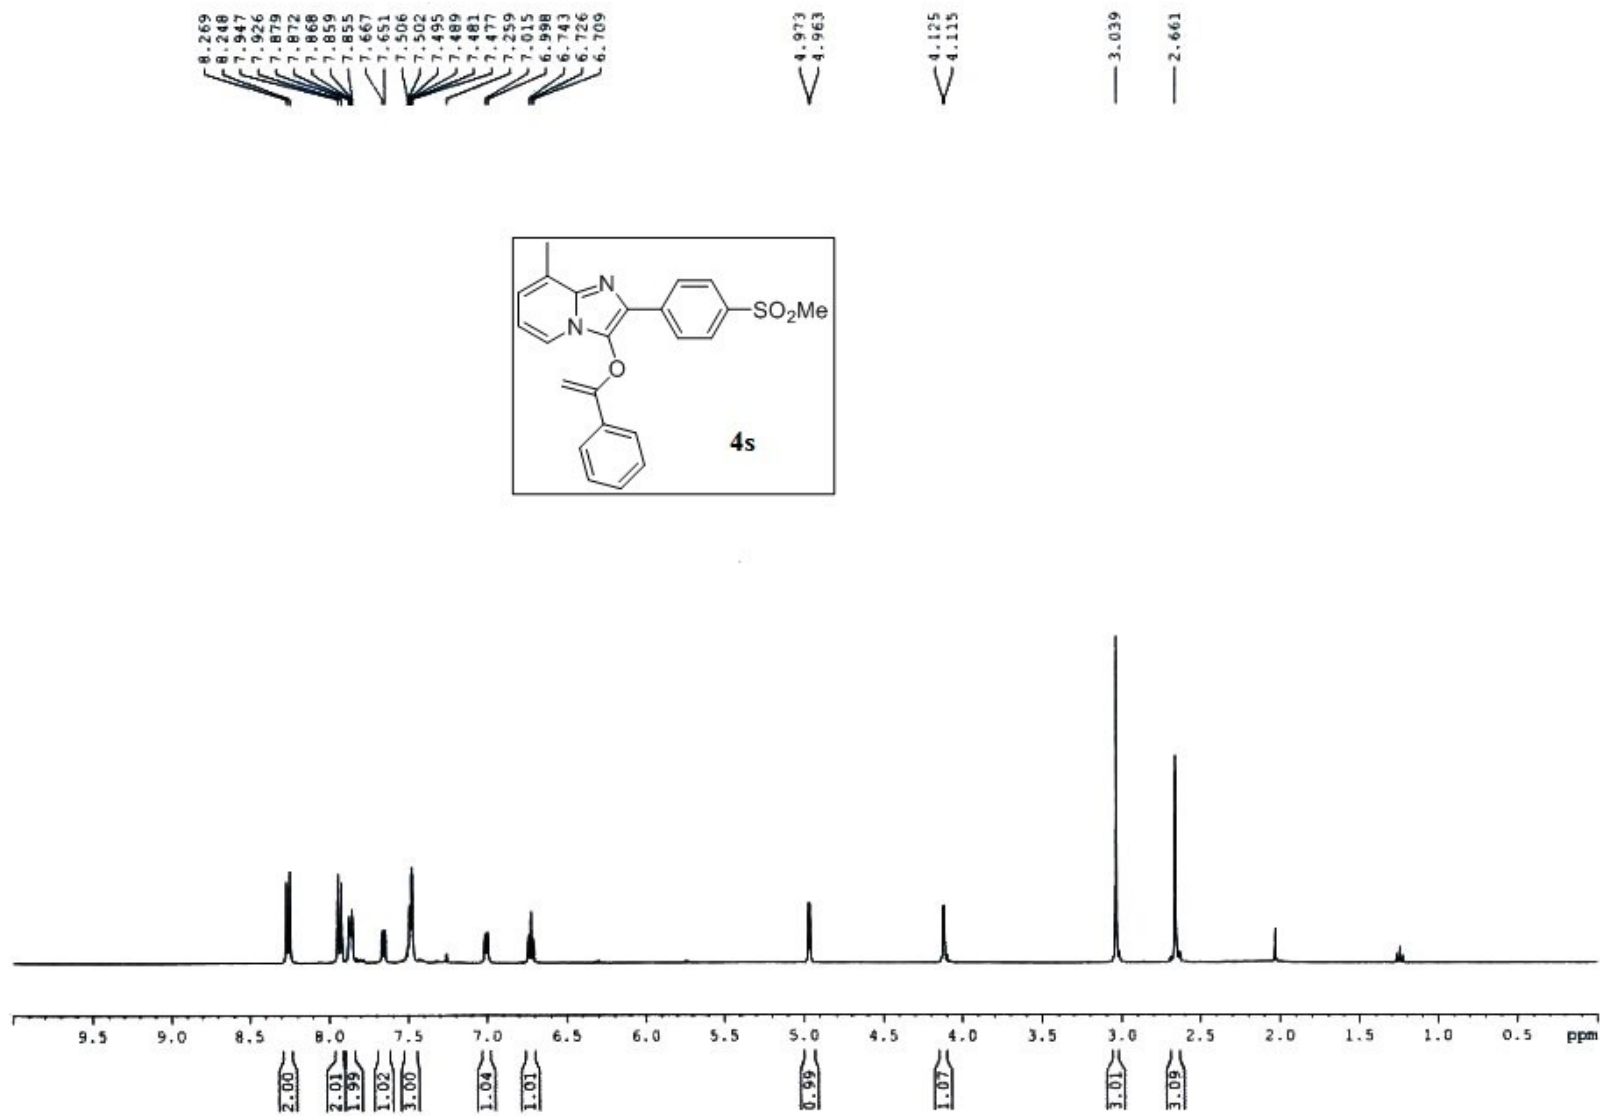

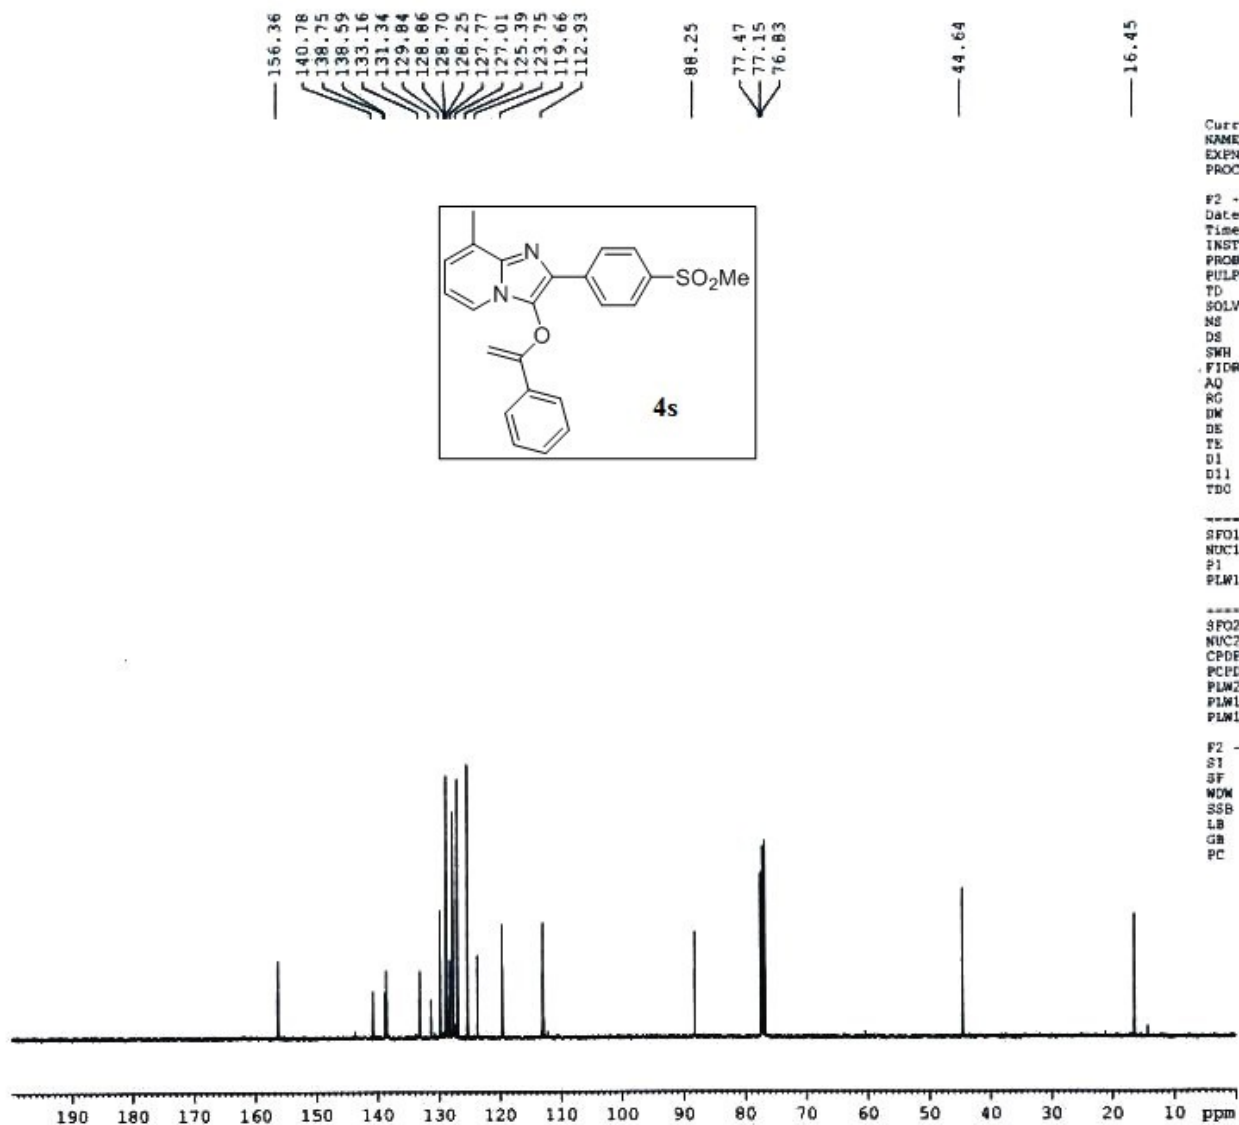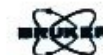

Current Data Parameters  
 NAME Dr.A.NAJRA 2017  
 EXPNO 1129  
 PROCNO 1

F2 - Acquisition Parameters  
 Date\_ 20170630  
 Time 20.16  
 INSTRUM spect  
 PROBHD 5 mm PABBO BB/  
 PULPROG zgpg30  
 TD 32768  
 SOLVENT CDCl3  
 NS 320  
 DS 2  
 SWH 24038.461 Hz  
 FIDRES 0.733596 Hz  
 AQ 0.6815744 sec  
 RG 47.25  
 DM 20.800 usec  
 DE 6.50 usec  
 TE 299.2 K  
 D1 2.0000000 sec  
 D11 0.0300000 sec  
 TDC 1

----- CHANNEL f1 -----  
 SFO1 100.6278588 MHz  
 NUC1 13C  
 P1 8.90 usec  
 PLW1 54.00000000 W  
 ----- CHANNEL f2 -----  
 SFO2 400.1516006 MHz  
 NUC2 1H  
 CPDPRG2 waltz16  
 PCPD2 90.00 usec  
 PLW2 12.00000000 W  
 PLW12 0.32231000 W  
 PLW13 0.16212000 W

F2 - Processing parameters  
 SI 16384  
 SF 100.6177914 MHz  
 WDM EM  
 SSB 0  
 LB 1.00 Hz  
 GB 0  
 PC 1.40

8.608  
8.270  
8.266  
8.249  
8.244  
7.954  
7.949  
7.934  
7.930  
7.891  
7.869  
7.861  
7.858  
7.845  
7.832  
7.817  
7.809  
7.701  
7.685  
7.543  
7.541  
7.537  
7.532  
7.524  
7.506  
7.493  
7.489  
7.477  
7.472  
7.460  
7.455  
7.450  
7.447  
7.443  
7.437  
7.425  
7.260  
7.001  
6.987  
6.984  
6.982  
6.723  
6.706  
6.689  
4.975  
4.966

4.224  
4.215

2.745

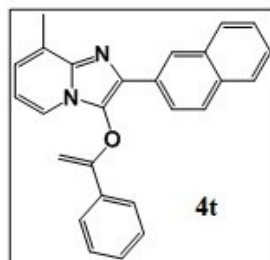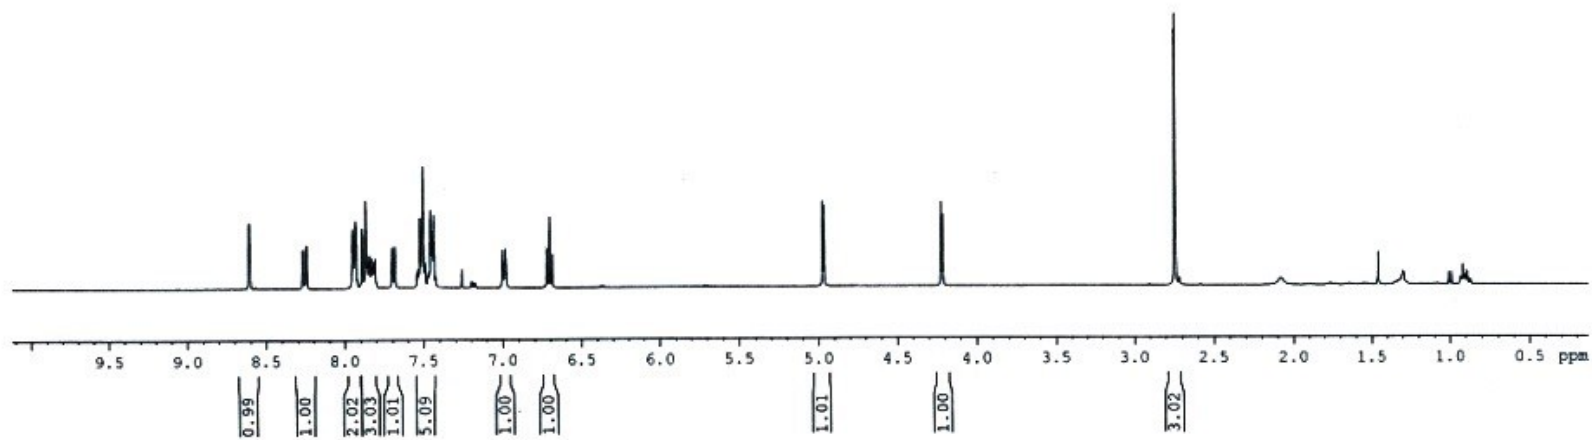

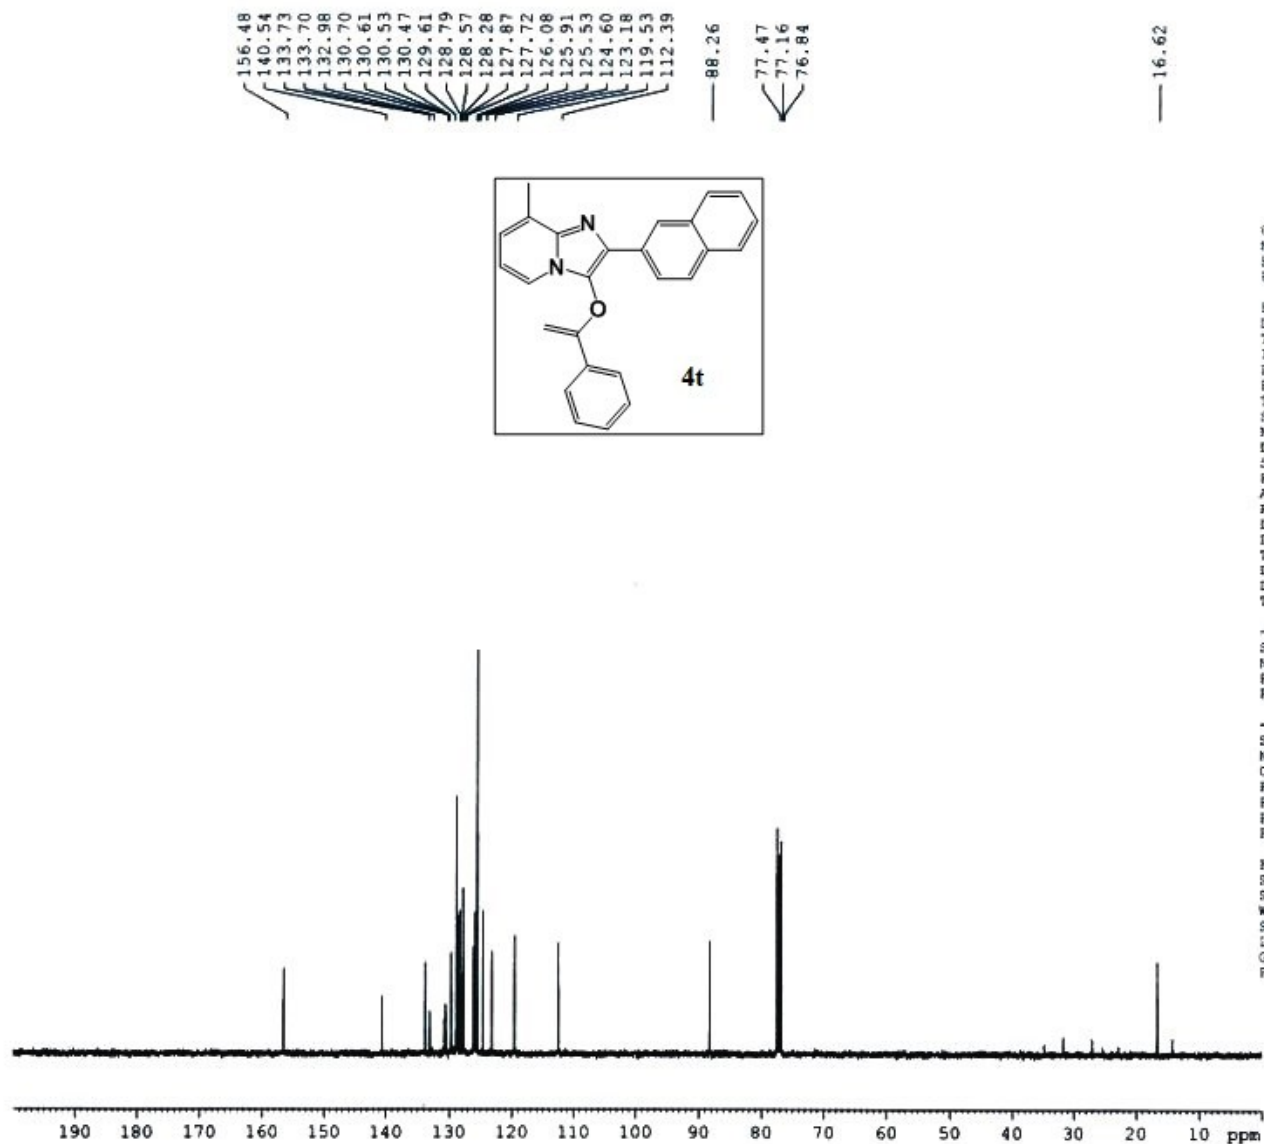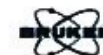

Current Data Parameters  
 NAME Dr.A.RAJRA 2017  
 EXPNO 1068  
 PROCNO 1

F2 - Acquisition Parameters  
 Date\_ 20170622  
 Time 10.55  
 INSTRUM spect  
 PROBHD 5 mm PABBO BB/  
 PULPROG zgpg30  
 TD 32768  
 SOLVENT CDCl3  
 NS 120  
 DS 2  
 SWH 24038.461 Hz  
 FIDRES 0.733596 Hz  
 AQ 0.6815744 sec  
 RG 47.25  
 DW 20.800 usec  
 DE 6.50 usec  
 TE 296.9 K  
 D1 2.0000000 sec  
 D11 0.0300000 sec  
 TDO 1

----- CHANNEL f1 -----  
 SFO1 100.6278588 MHz  
 NUC1 13C  
 P1 8.90 usec  
 PLW1 54.0000000 W

----- CHANNEL f2 -----  
 SFO2 400.1516006 MHz  
 NUC2 1H  
 CPDPRG12 waltz16  
 PCPD2 90.00 usec  
 PLW2 12.0000000 W  
 PLW12 0.3223100 W  
 PLW13 0.16212000 W

F2 - Processing parameters  
 S1 16384  
 SF 100.6177919 MHz  
 WDW EM  
 SSB 0  
 LB 1.00 Hz  
 GB 0  
 PC 1.40

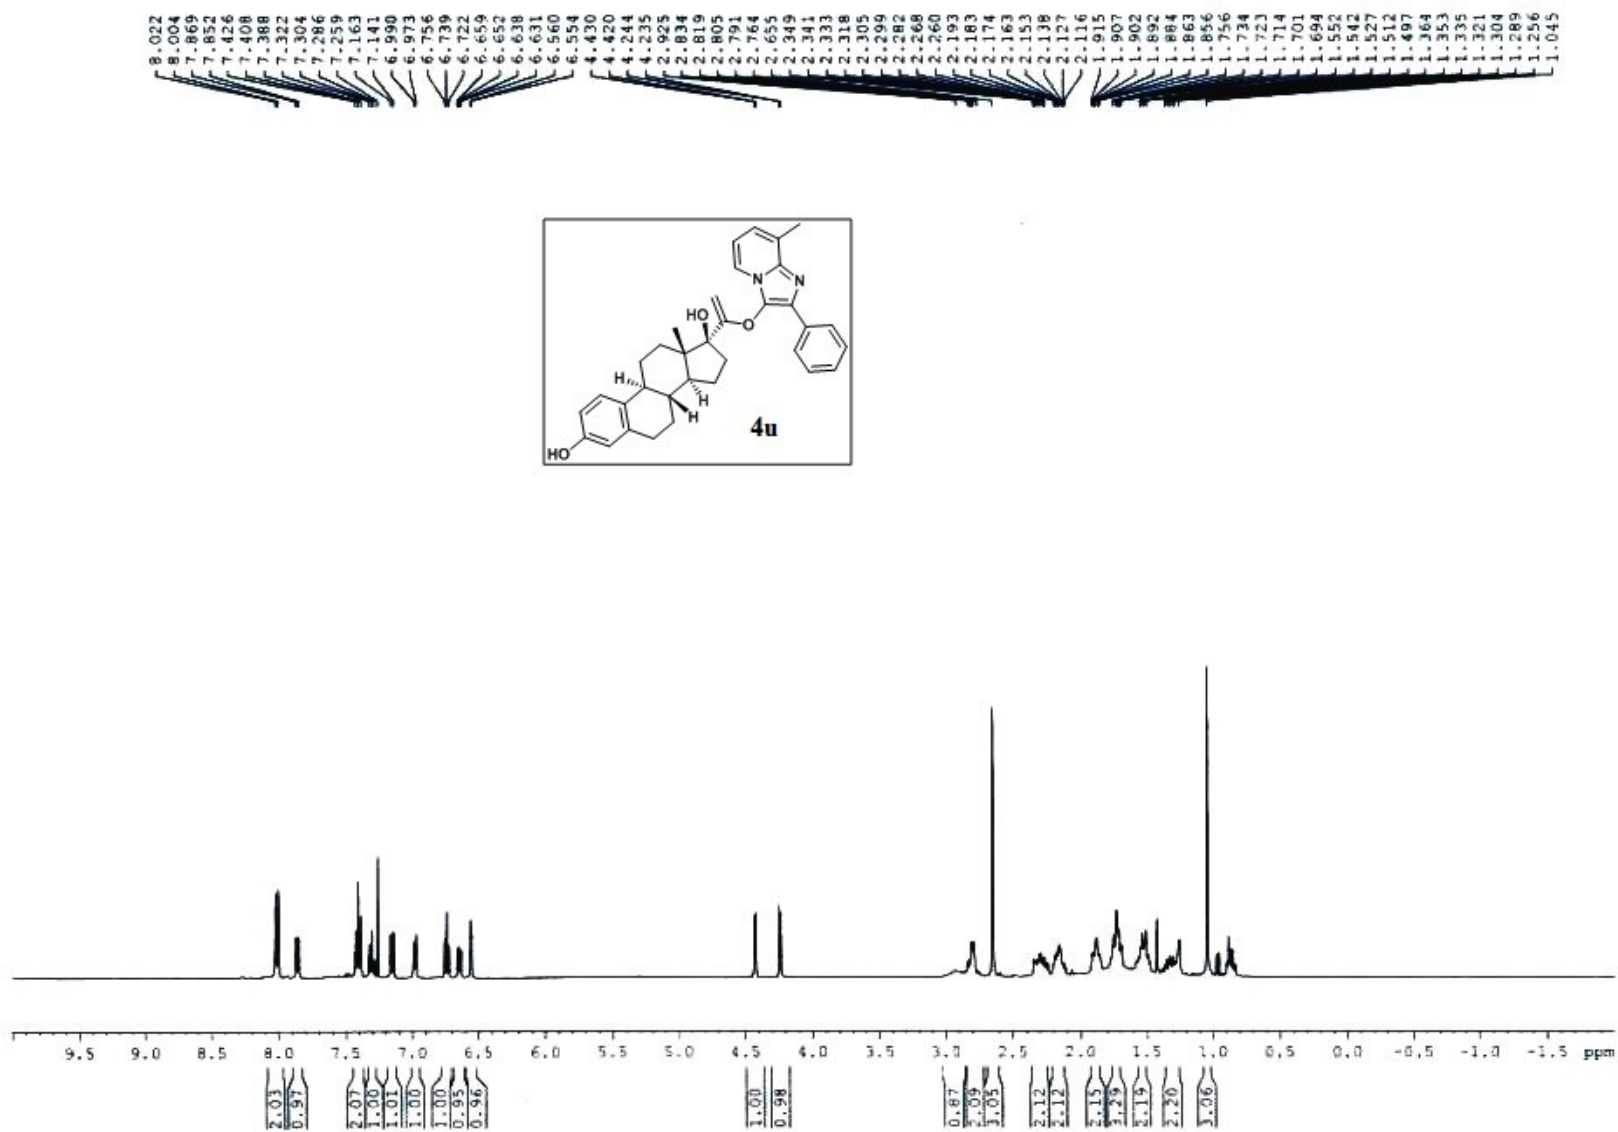

— 162.72  
 — 153.87  
 140.51  
 138.31  
 132.74  
 132.37  
 131.68  
 129.68  
 128.54  
 127.95  
 127.62  
 126.50  
 123.35  
 120.14  
 115.50  
 112.92  
 112.54  
 — 91.21  
 — 86.04  
 77.47  
 77.15  
 76.83  
 48.85  
 47.71  
 43.73  
 39.63  
 36.15  
 34.26  
 29.70  
 27.53  
 26.64  
 23.05  
 16.67  
 14.67

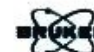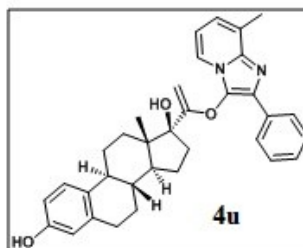

Current Data Parameters  
 NAME Dr.A.HAJRA 2017  
 EXPNO 1261  
 PROCNO 1

F2 - Acquisition Parameters  
 Date 20170721  
 Time 19.32  
 INSTRUM spect  
 PROBHD 5 mm PABBO BB/  
 PULPROG zgpg30  
 TD 32768  
 SOLVENT CDCl3  
 NS 721  
 DS 2  
 SWH 24038.461 Hz  
 FIDRES 0.733596 Hz  
 AQ 0.6815744 sec  
 RG 120.16  
 DW 20.800 usec  
 DE 6.50 usec  
 TE 298.5 K  
 DI 2.0000000 sec  
 D11 0.0300000 sec  
 TDC 1

----- CHANNEL f1 -----  
 SFO1 100.6278588 MHz  
 NUC1 13C  
 P1 8.90 usec  
 PLW1 54.0000000 W

----- CHANNEL f2 -----  
 SFO2 400.1516006 MHz  
 NUC2 1H  
 CPDPRG12 waltz16  
 PCPD2 90.00 usec  
 PLW2 12.0000000 W  
 PLW12 0.32231000 W

F2 - Processing parameters  
 SI 16384  
 SF 100.6177944 MHz  
 WDM RM  
 SSB 0  
 LB 1.00 Hz  
 GB 0  
 RC 1.60

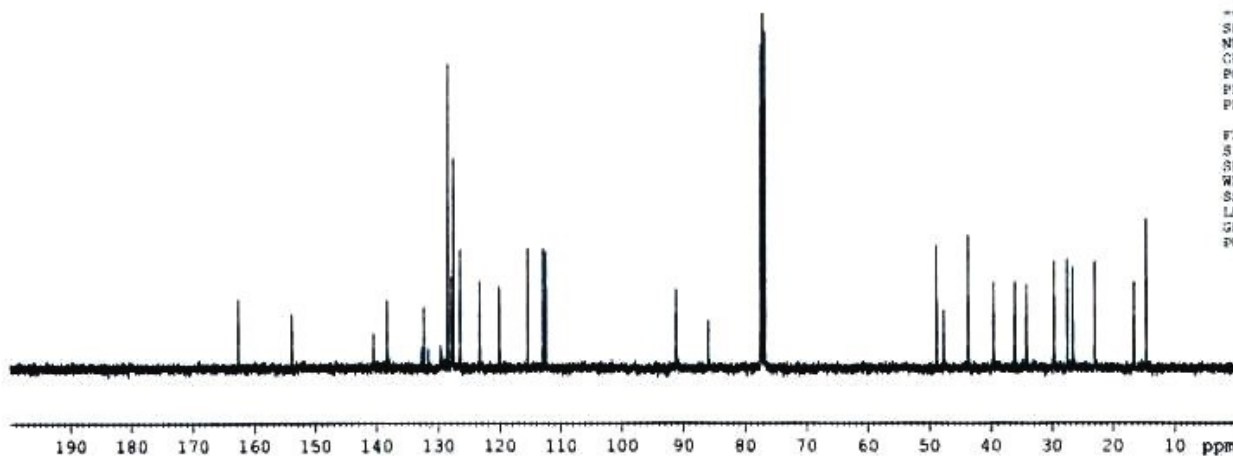

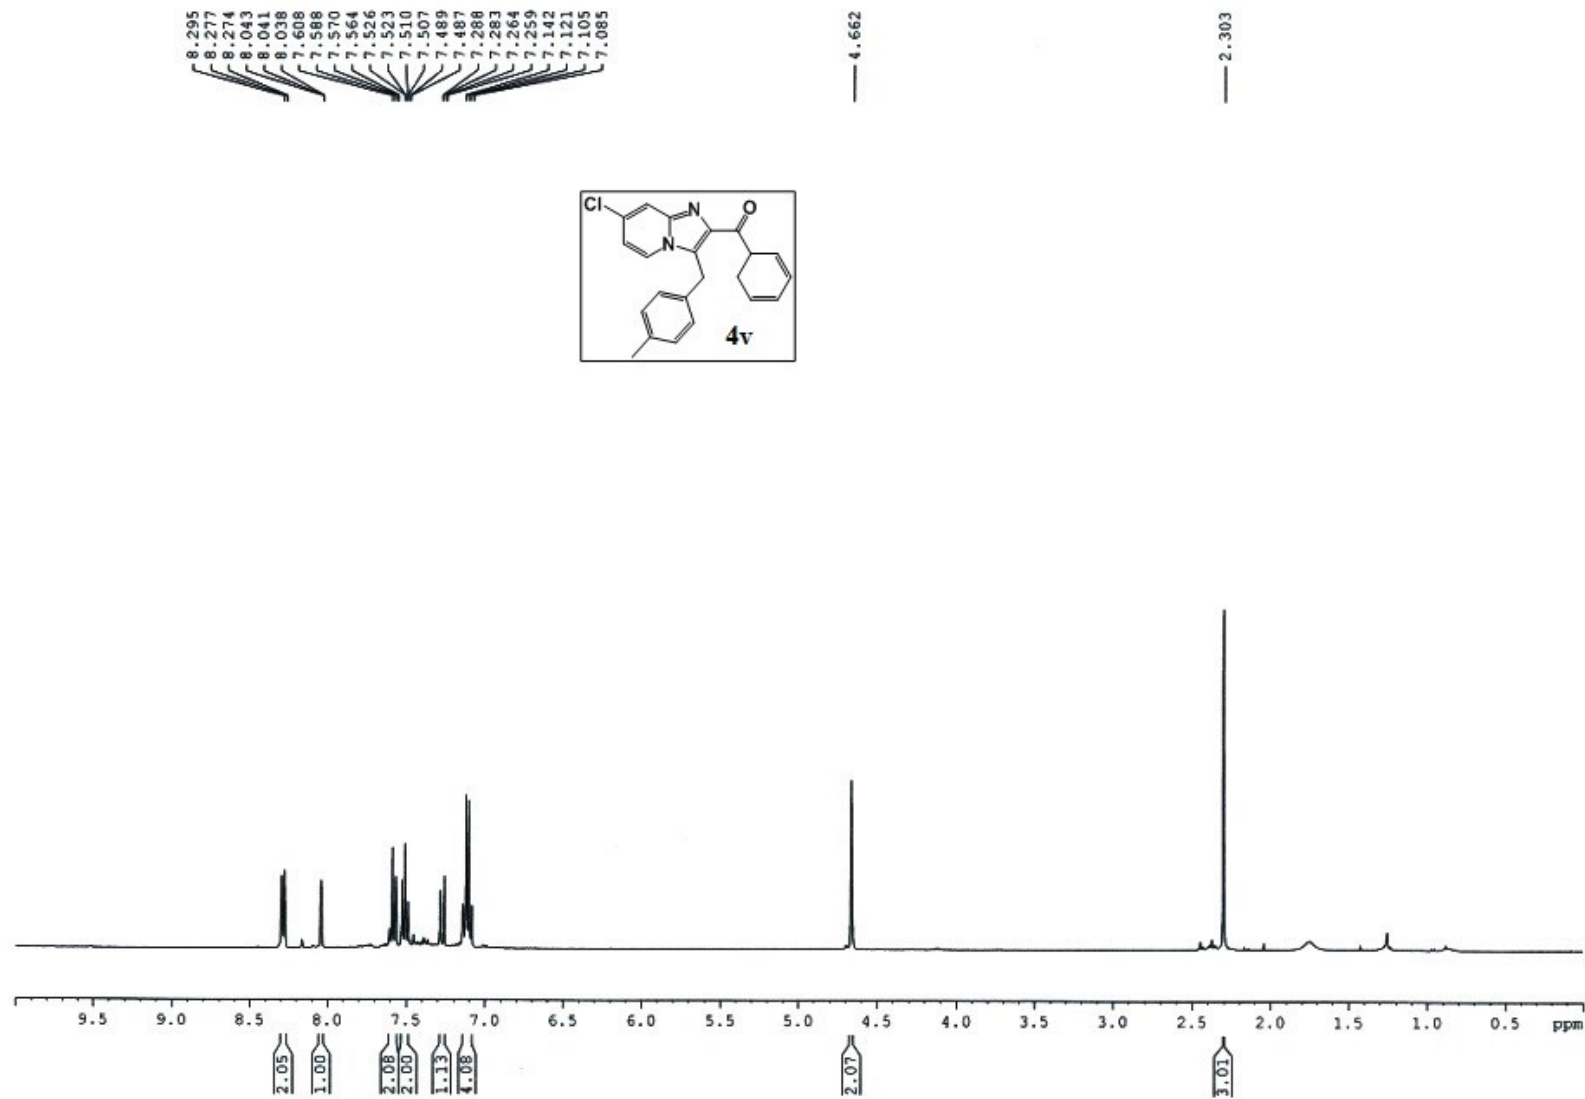

— 190.83

142.00  
140.60  
138.08  
136.75  
133.00  
132.78  
130.94  
129.76  
129.23  
128.87  
128.28  
128.15  
123.96  
119.92  
108.72

77.45  
77.14  
76.82

— 29.41

— 21.13

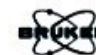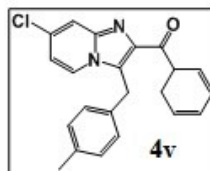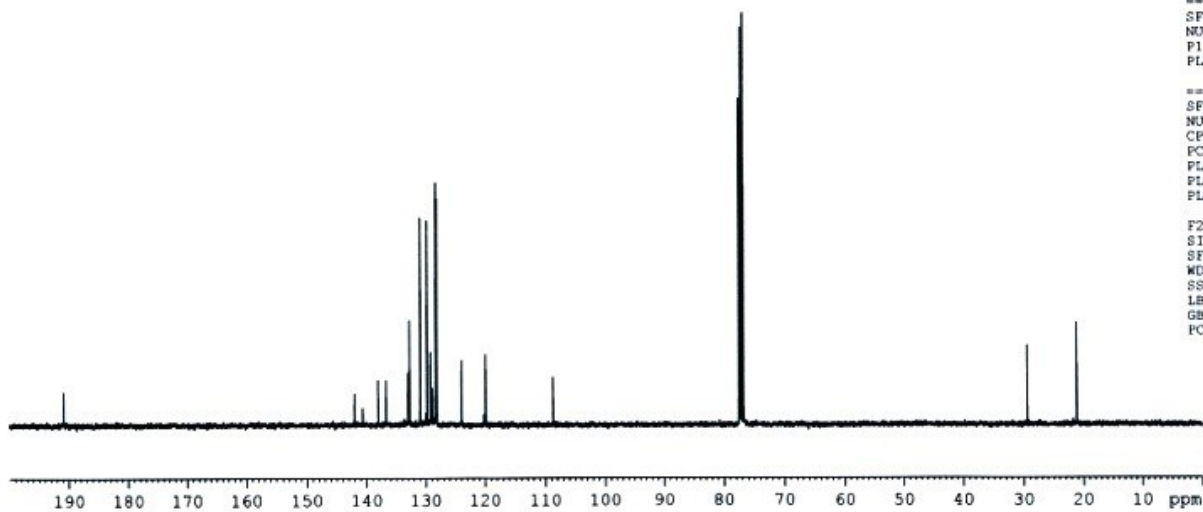

Current Data Parameters  
NAME Dr.A.HAJRA 2016  
EXPNO 815  
PROCNO 1

F2 - Acquisition Parameters  
Date\_ 20160808  
Time 13.36  
INSTRUM spect  
PROBHD 5 mm PABBO BB/  
PULPROG zgpg30  
TD 32768  
SOLVENT CDCl3  
NS 550  
DS 2  
SWH 24038.461 Hz  
FIDRES 0.733596 Hz  
AQ 0.6815744 sec  
RG 67.81  
DW 20.800 usec  
DE 6.50 usec  
TE 298.0 K  
D1 2.0000000 sec  
D11 0.0300000 sec  
TD0 1

----- CHANNEL f1 -----  
SFO1 100.6278589 MHz  
NUC1 13C  
P1 8.90 usec  
PLW1 54.00000000 W

----- CHANNEL f2 -----  
SFO2 400.1516006 MHz  
NUC2 1H  
CPDPRG2 waltz16  
PCPD2 90.00 usec  
PLW2 12.00000000 W  
PLW12 0.32231000 W  
PLW13 0.16212000 W

F2 - Processing parameters  
SI 16384  
SF 100.6177872 MHz  
WDW EM  
SSB 0  
LB 1.00 Hz  
GB 0  
PC 1.40



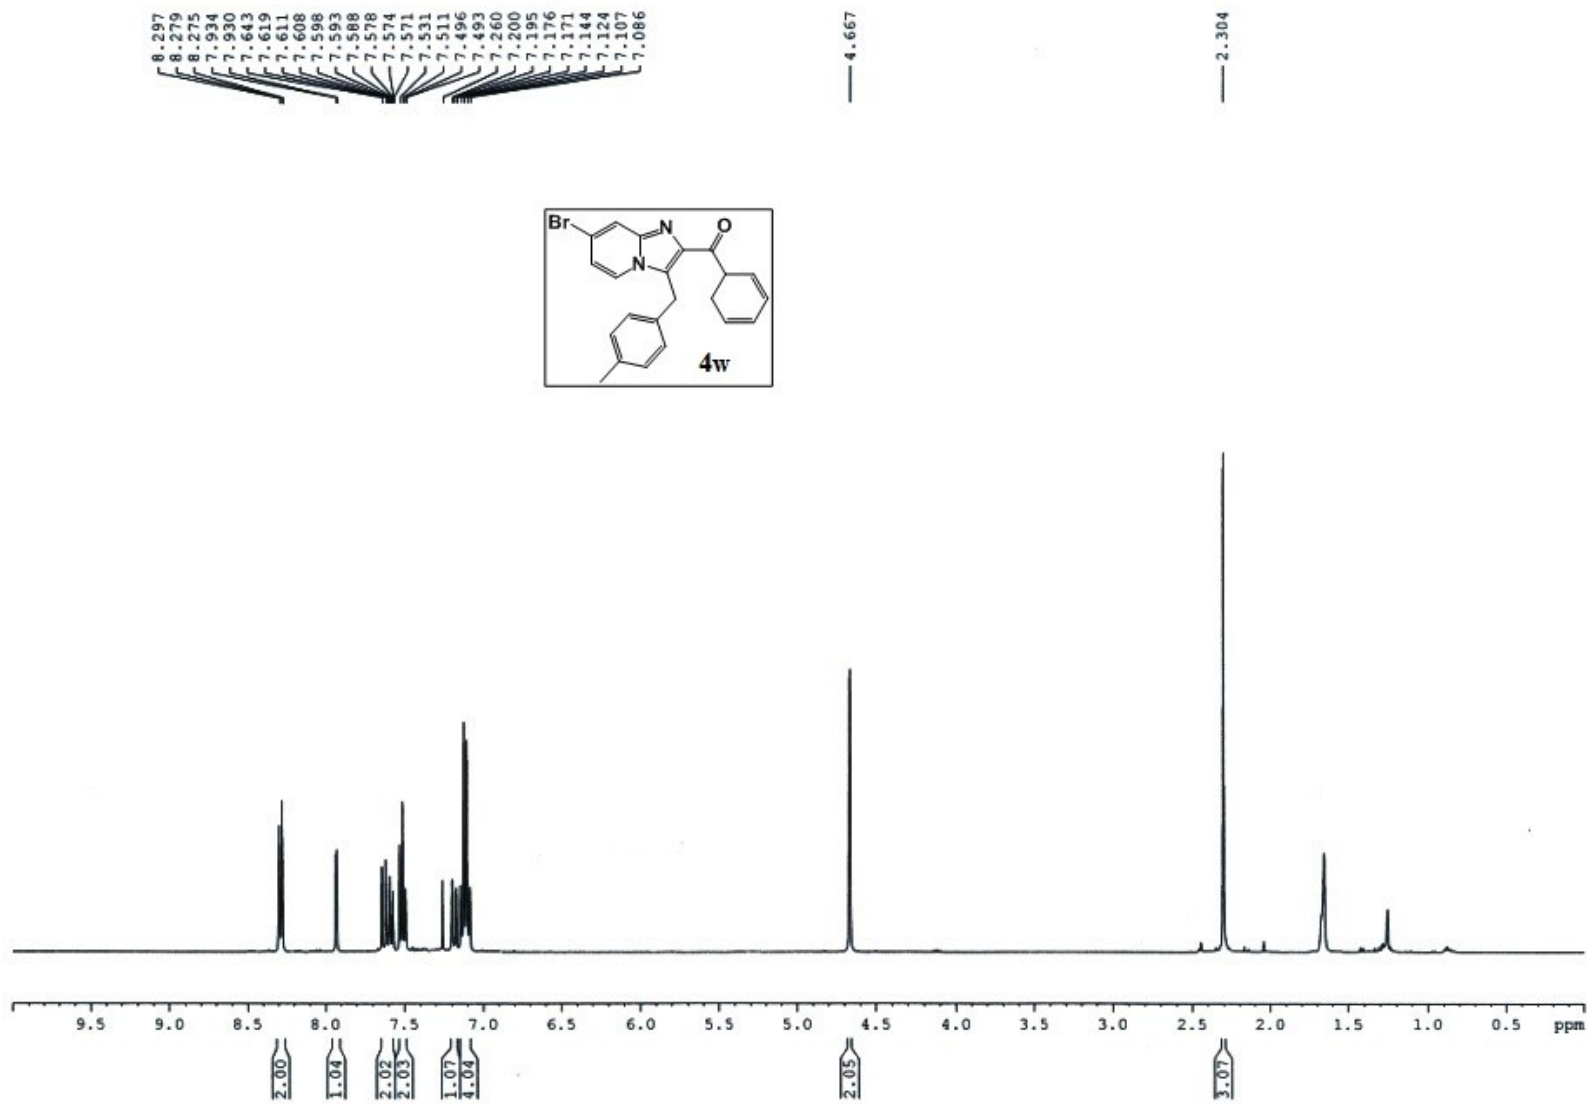

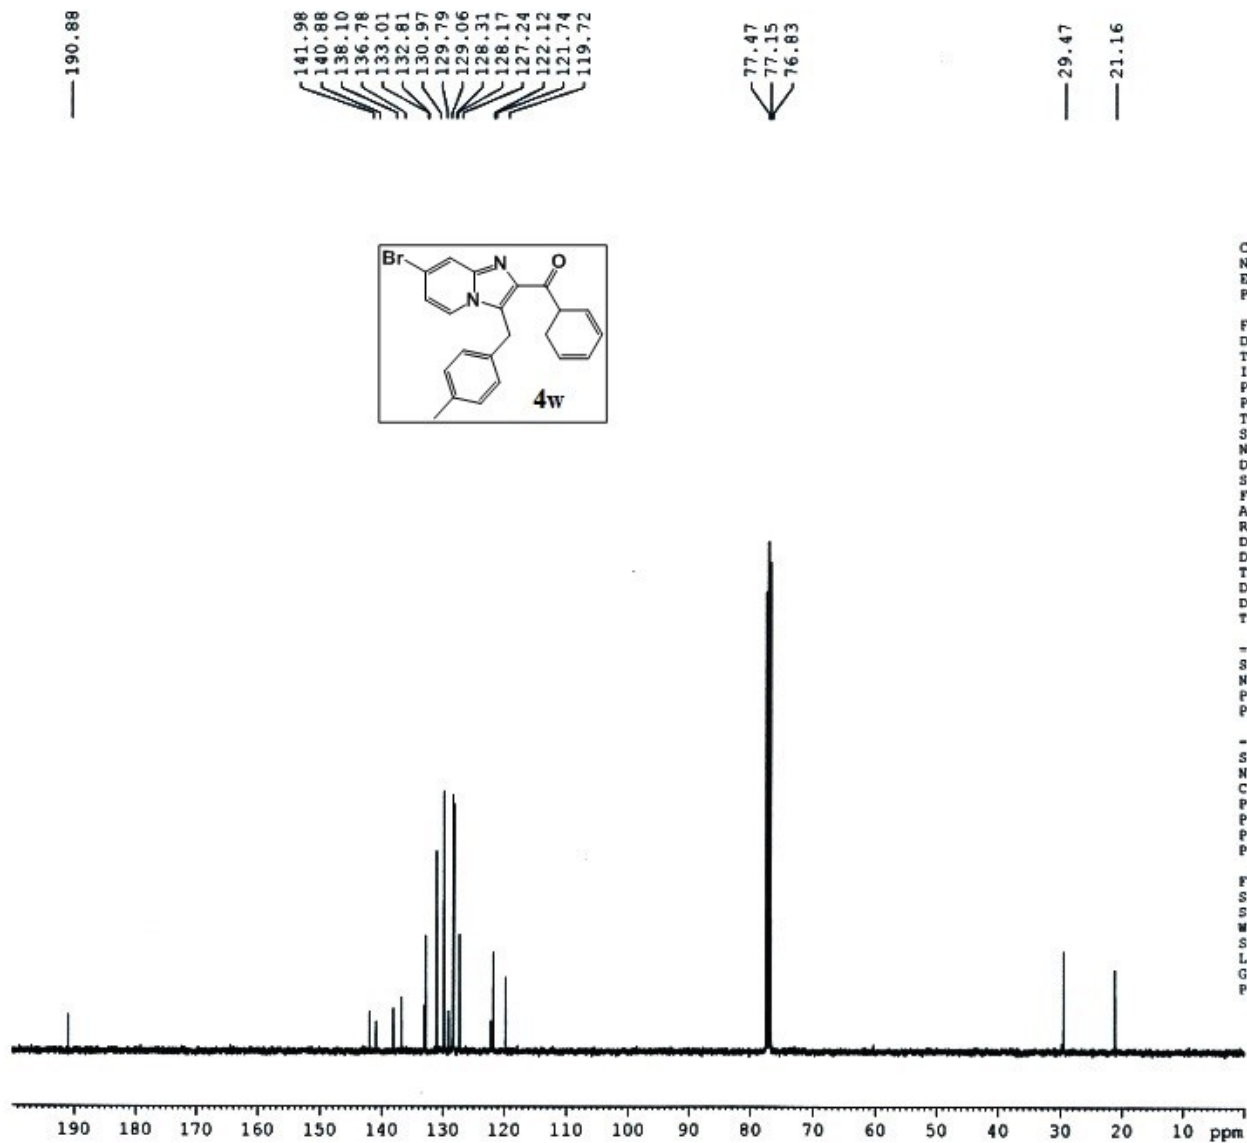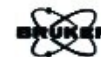

Current Data Parameters  
 NAME Dr.A.HAJRA 2016  
 EXPNO 800  
 PROCNO 1

F2 - Acquisition Parameters  
 Date 20160806  
 Time 13.54  
 INSTRUM spect  
 PROBHD 5 mm PABBO BB/  
 PULPROG zgpg30  
 TD 32768  
 SOLVENT CDCl3  
 NS 600  
 DS 2  
 SWH 24038.461 Hz  
 FIDRES 0.733596 Hz  
 AQ 0.6815744 sec  
 RG 120.16  
 DM 20.800 usec  
 DE 6.50 usec  
 TE 297.8 K  
 D1 2.0000000 sec  
 D11 0.03000000 sec  
 TDO 1

----- CHANNEL f1 -----  
 SFO1 100.6278588 MHz  
 NUC1 13C  
 P1 8.90 usec  
 PLW1 54.00000000 W

----- CHANNEL f2 -----  
 SFO2 400.1516006 MHz  
 NUC2 1H  
 CPDPRG[2] waltz16  
 PCPD2 90.00 usec  
 PLW2 12.00000000 W  
 PLW12 0.32231000 W  
 PLW13 0.16212000 W

F2 - Processing parameters  
 SI 16384  
 SF 100.6177858 MHz  
 WDW EM  
 SSB 0  
 LB 1.00 Hz  
 GB 0  
 PC 1.40

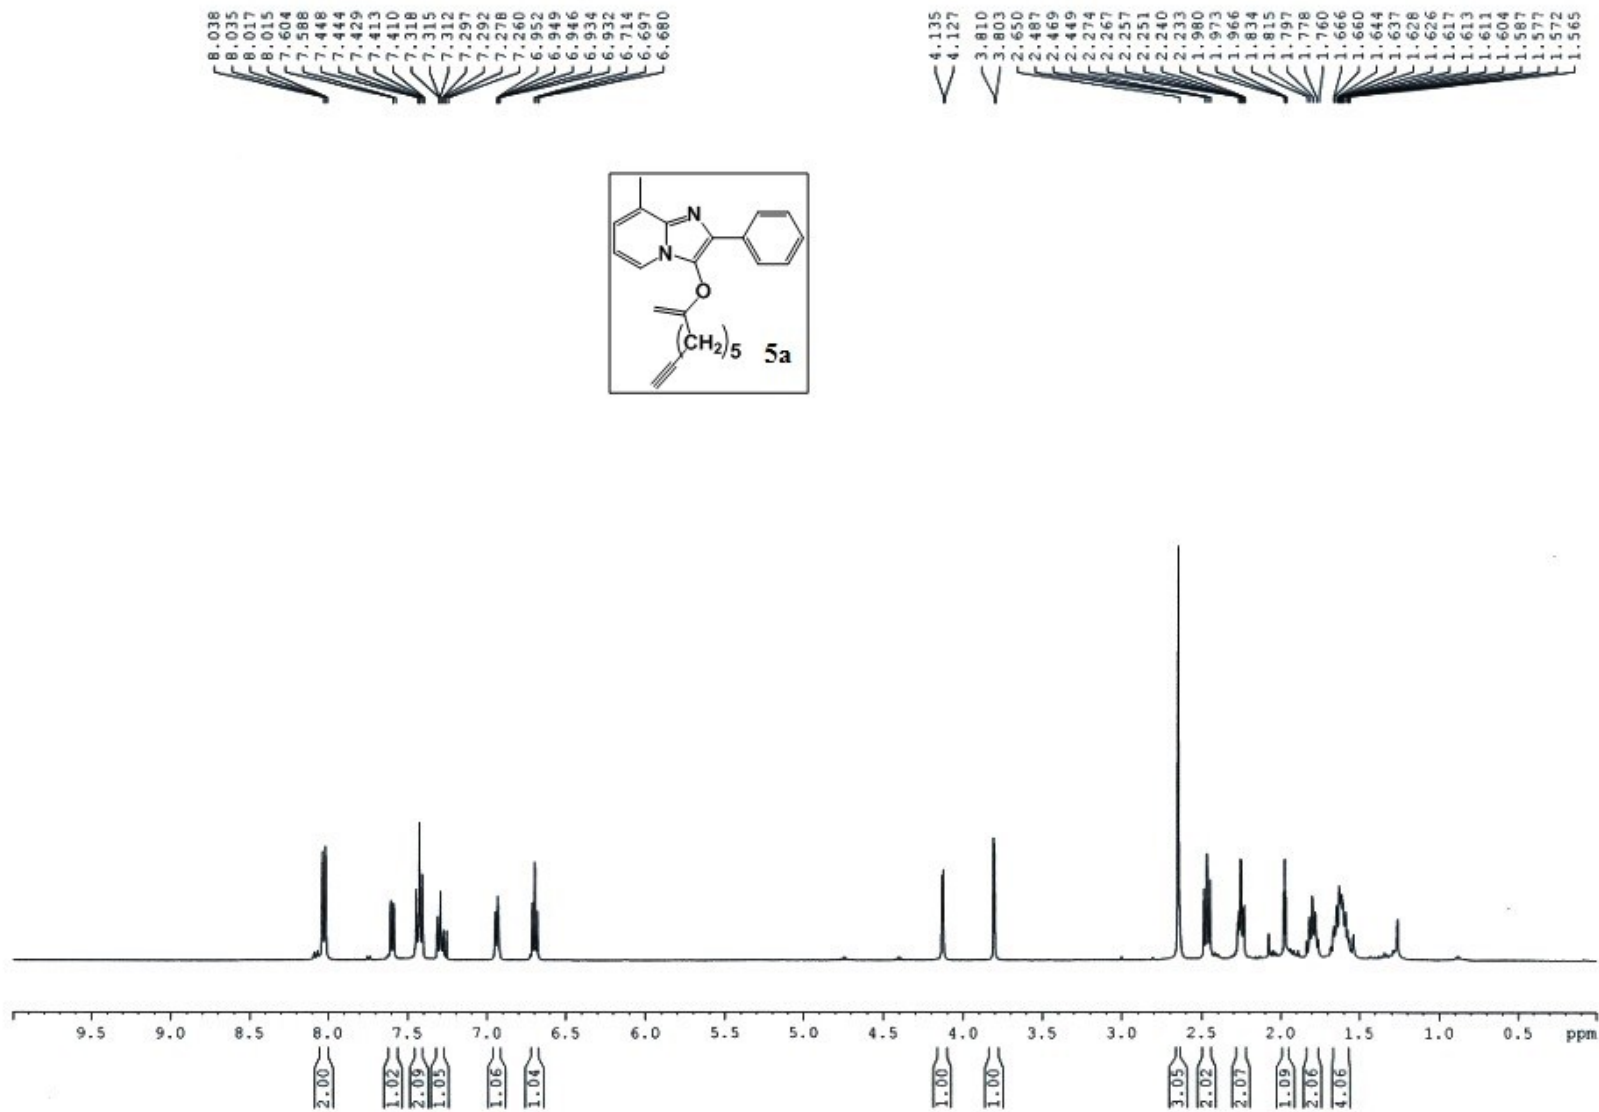

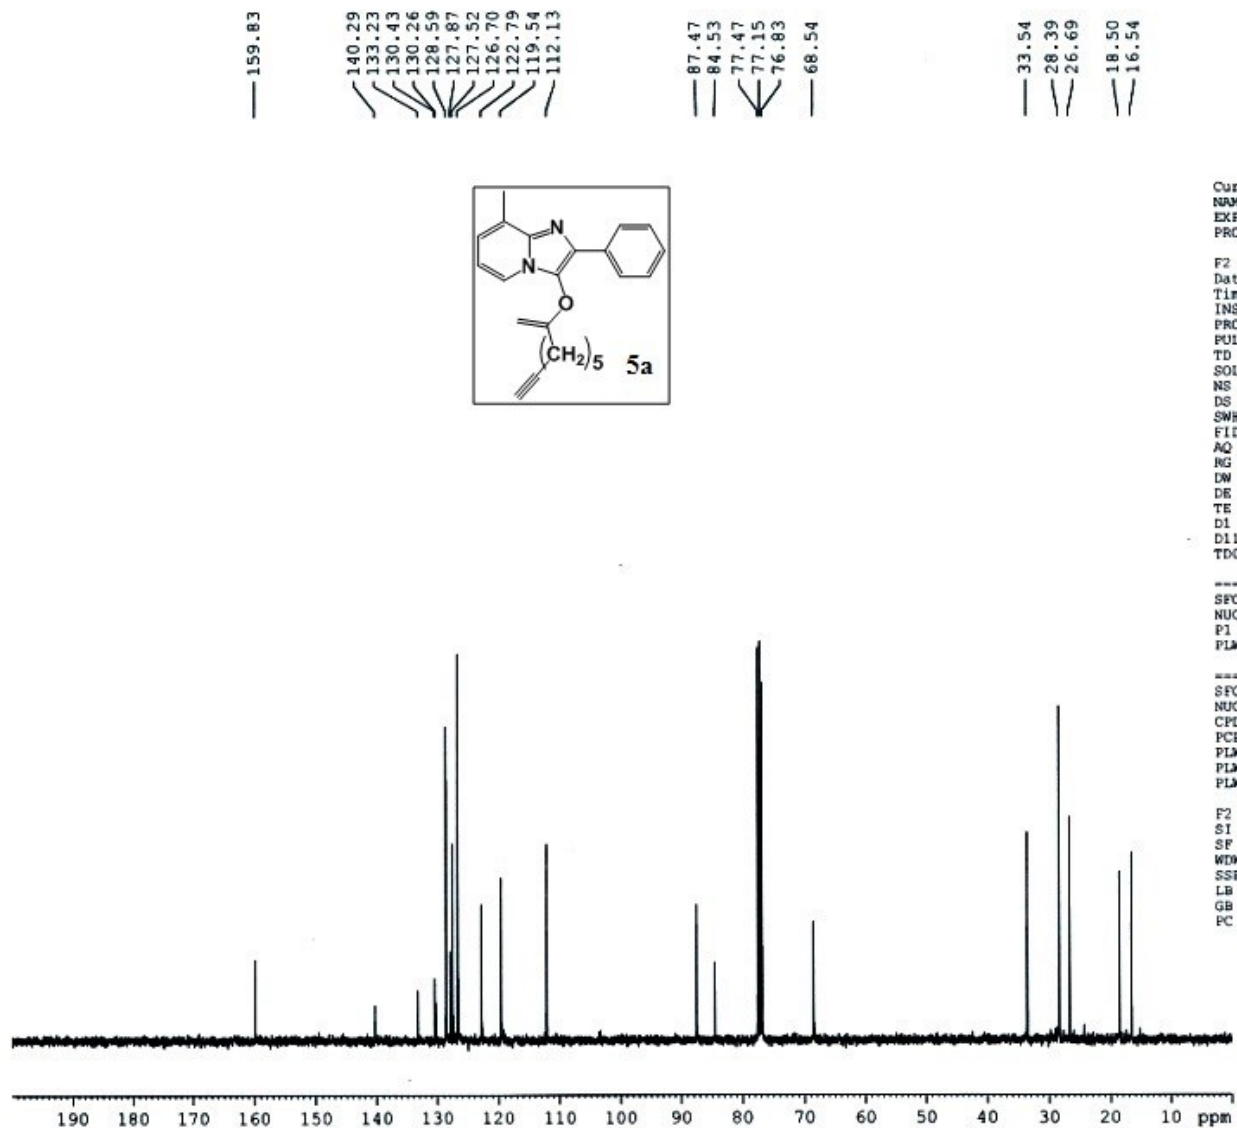

Current Data Parameters  
 NAME Dr.A.HAJRA 2016  
 EXPNO 481  
 PROCNO 1

F2 - Acquisition Parameters  
 Date\_ 20160609  
 Time 17.20  
 INSTRUM spect  
 PROBHD 5 mm PABBO BB/  
 PULPROG zgpg30  
 TD 32768  
 SOLVENT CDC13  
 NS 320  
 DS 2  
 SWH 24038.461 Hz  
 FIDRES 0.733596 Hz  
 AQ 0.6815744 sec  
 RG 57.28  
 DW 20.800 usec  
 DE 6.50 usec  
 TE 302.9 K  
 D1 2.00000000 sec  
 D11 0.03000000 sec  
 TD0 1

----- CHANNEL f1 -----  
 SFO1 100.6278588 MHz  
 NUC1 13C  
 P1 8.90 usec  
 PLW1 54.00000000 W

----- CHANNEL f2 -----  
 SFO2 400.1516006 MHz  
 NUC2 1H  
 CPDPRG2 waltz16  
 PCPD2 90.00 usec  
 PLW2 12.00000000 W  
 PLW12 0.32231000 W  
 PLW13 0.16212000 W

F2 - Processing parameters  
 SI 16384  
 SF 100.6177858 MHz  
 WDW EM  
 SSB 0  
 LB 1.00 Hz  
 GB 0  
 PC 1.40

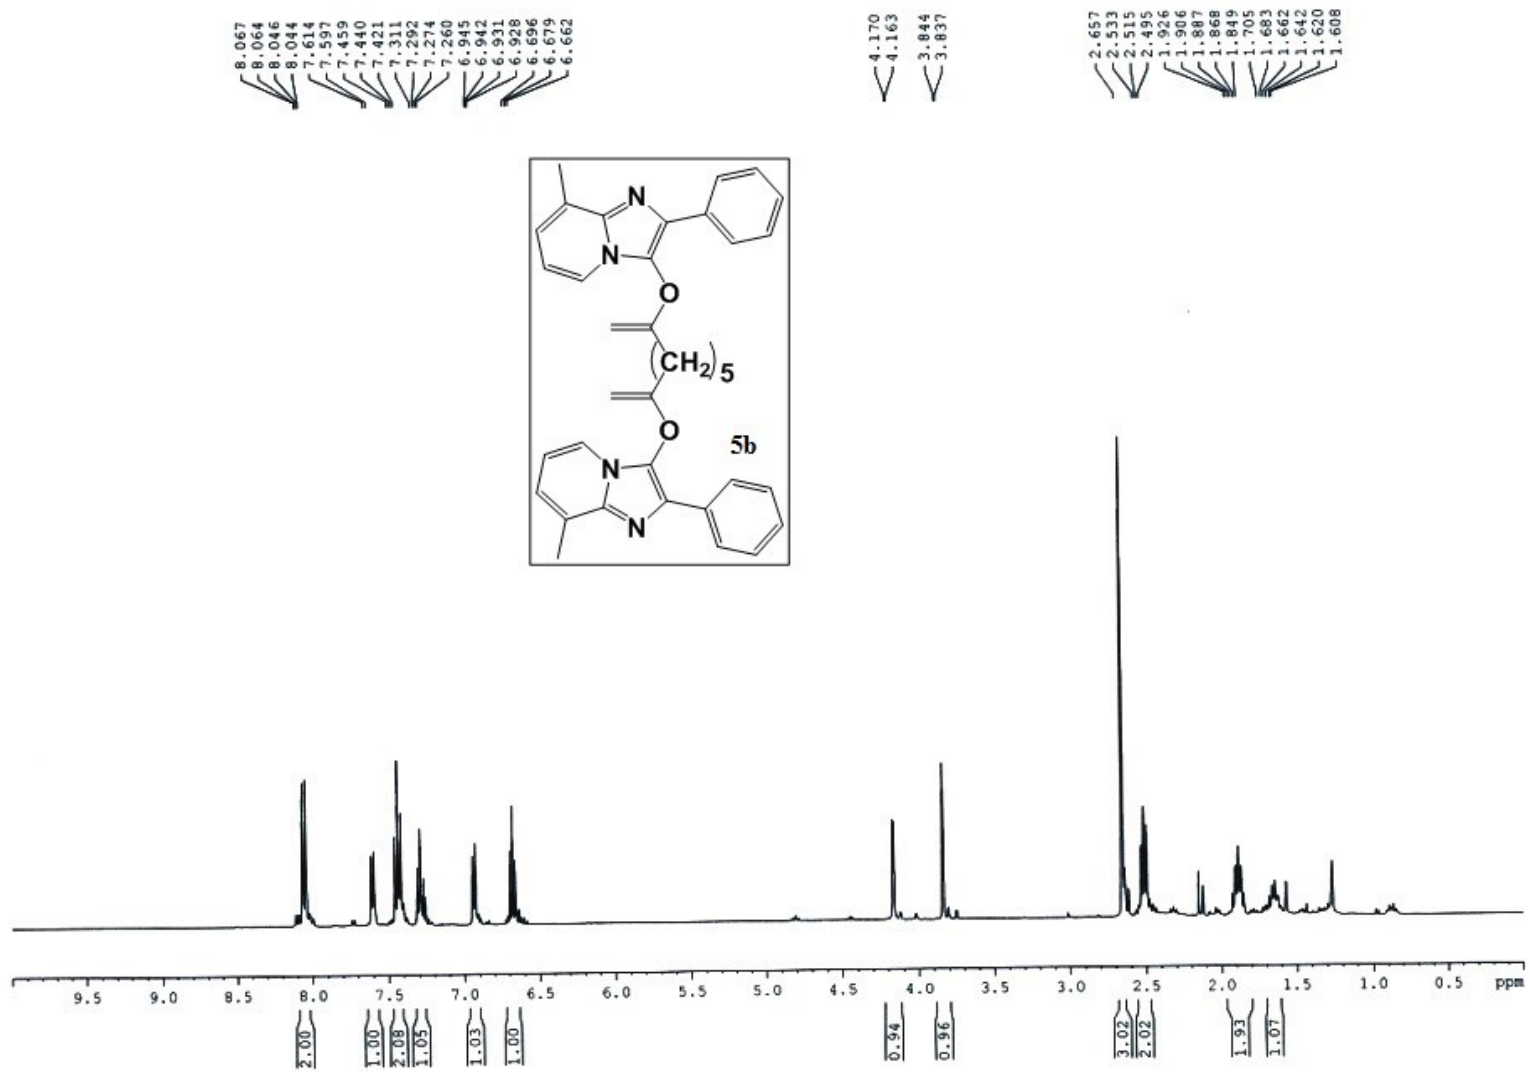

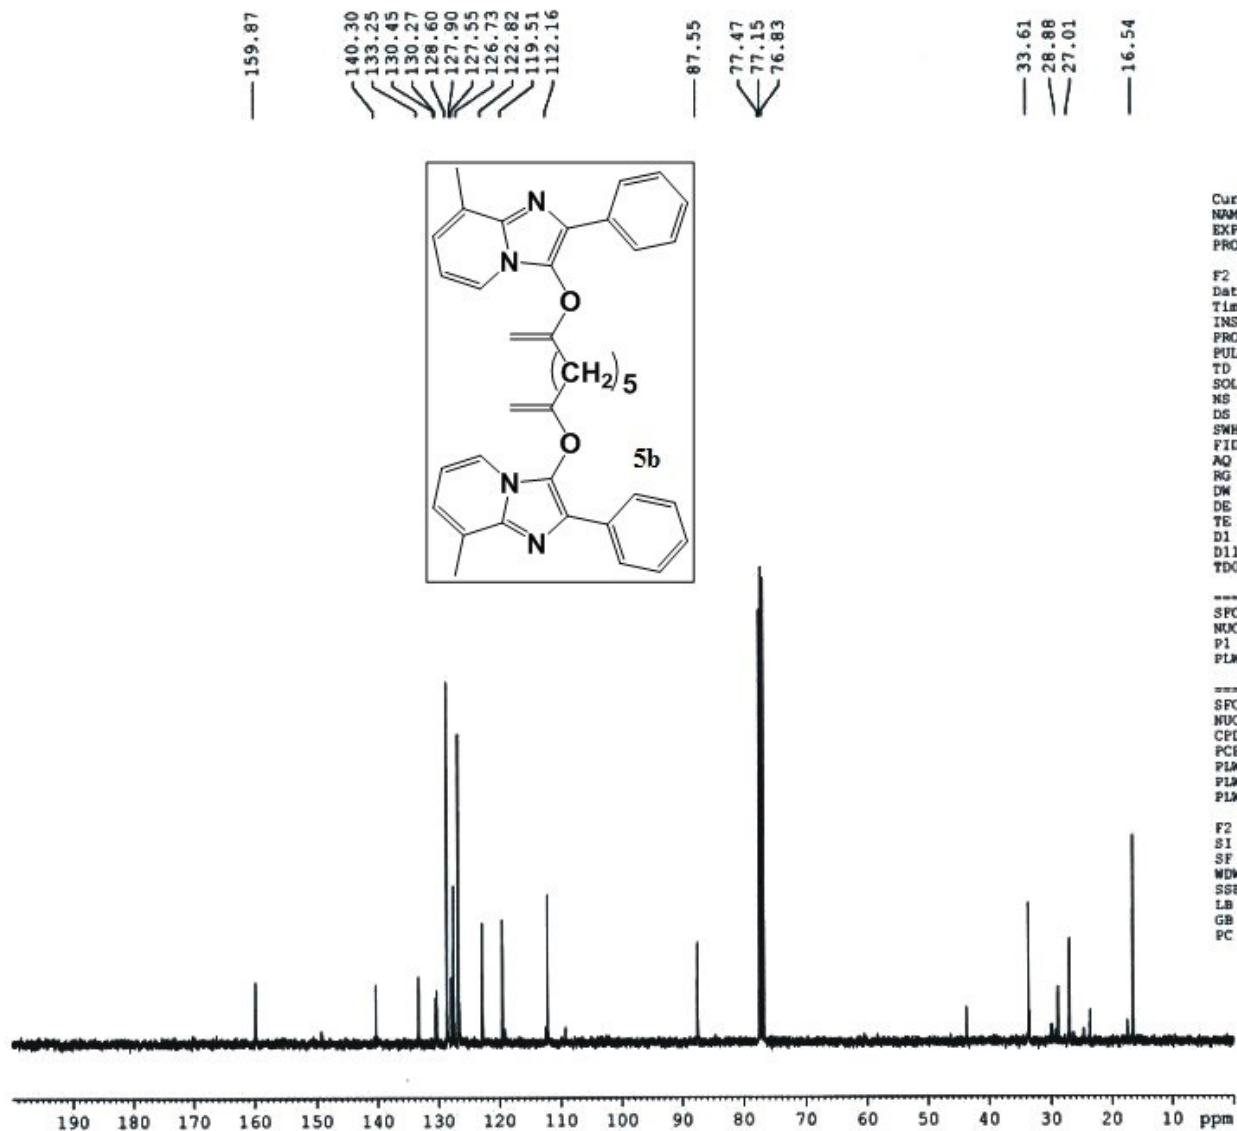

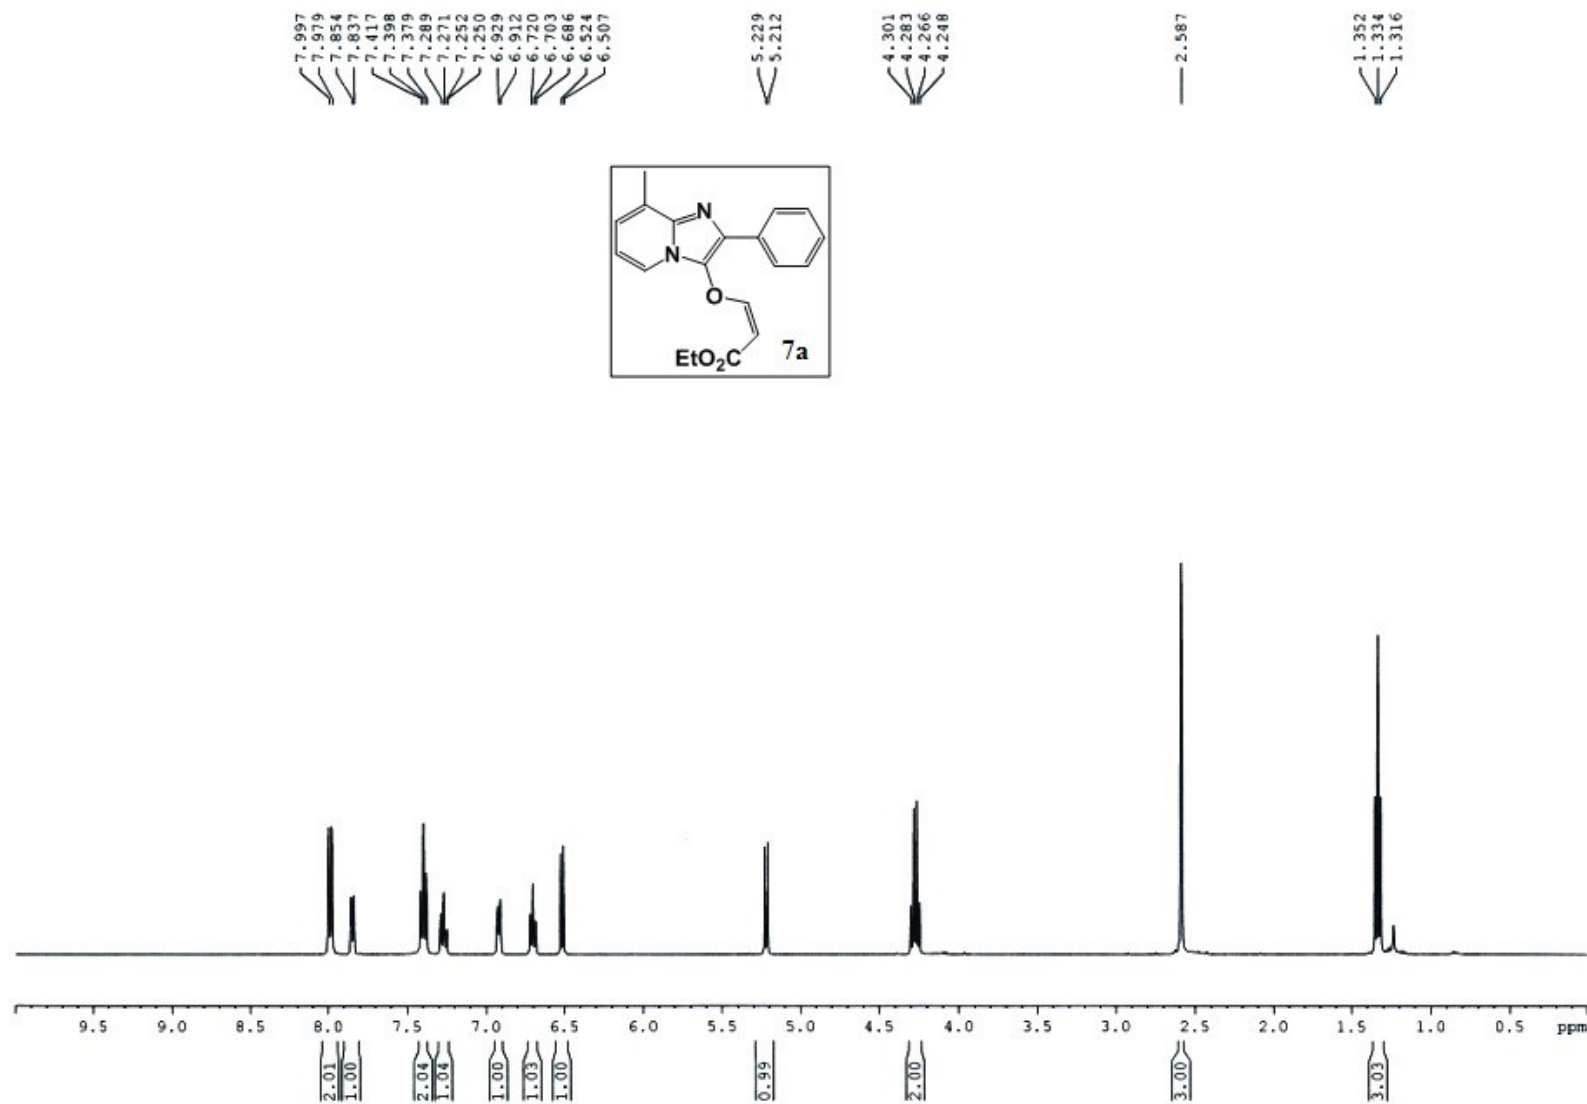

— 164.09  
 — 155.75  
 139.65  
 133.34  
 132.20  
 128.71  
 127.74  
 127.67  
 126.97  
 123.22  
 119.24  
 112.65  
 — 102.50  
 77.47  
 77.15  
 76.83  
 — 60.32  
 16.37  
 14.34

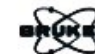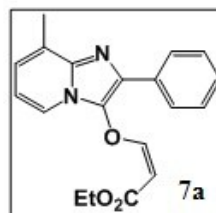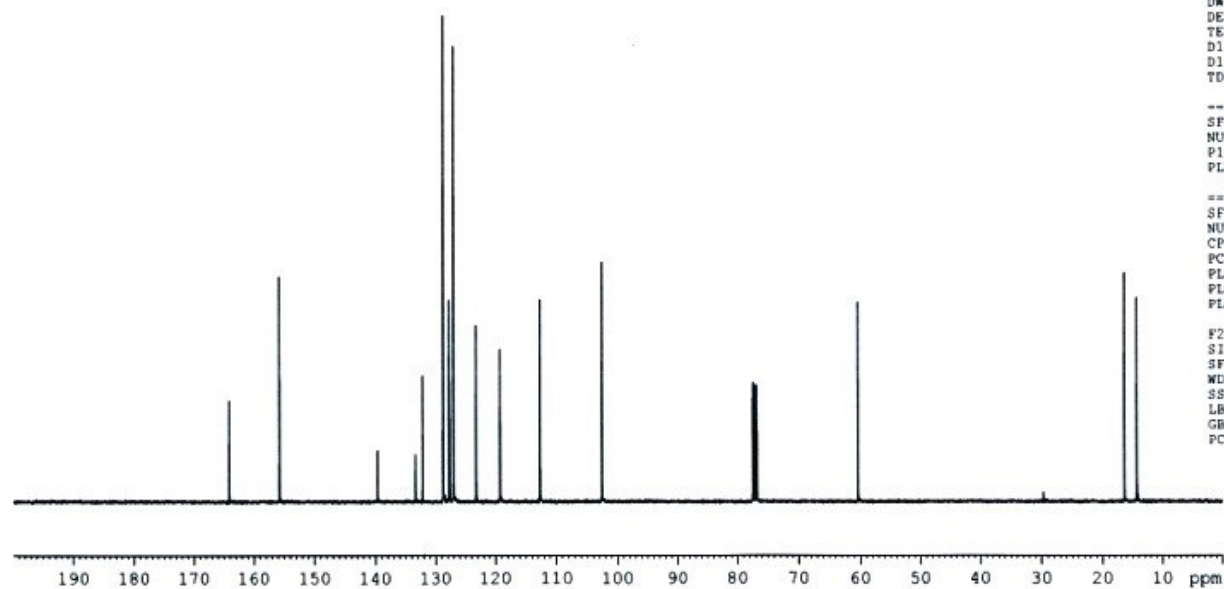

Current Data Parameters  
 NAME Dr.A.RAJRA 2016  
 EXPNO 507  
 PROCNO 1  
 F2 - Acquisition Parameters  
 Date\_ 20160614  
 Time\_ 19.51  
 INSTRUM spect  
 PROBRD 5 mm PABBO BB/  
 PULPROG zgpg30  
 TD 32768  
 SOLVENT CDC13  
 NS 256  
 DS 2  
 SWH 24038.461 Hz  
 FIDRES 0.733596 Hz  
 AQ 0.6815744 sec  
 RG 19.02  
 DW 20.800 usec  
 DE 6.50 usec  
 TE 299.2 K  
 D1 2.00000000 sec  
 D11 0.03000000 sec  
 TDO 1  
 ----- CHANNEL f1 -----  
 SFO1 100.6278588 MHz  
 NUC1 13C  
 P1 8.90 usec  
 PLW1 54.00000000 W  
 ===== CHANNEL f2 =====  
 SFO2 400.1516006 MHz  
 NUC2 1H  
 CPDPRG[2] waitz16  
 PCPD2 90.00 usec  
 PLW2 12.00000000 W  
 PLW12 0.32231000 W  
 PLW13 0.16212000 W  
 F2 - Processing parameters  
 S1 16384  
 SF 100.6177984 MHz  
 WDW EM  
 SSB 0  
 LB 1.00 Hz  
 GB 0  
 PC 1.40



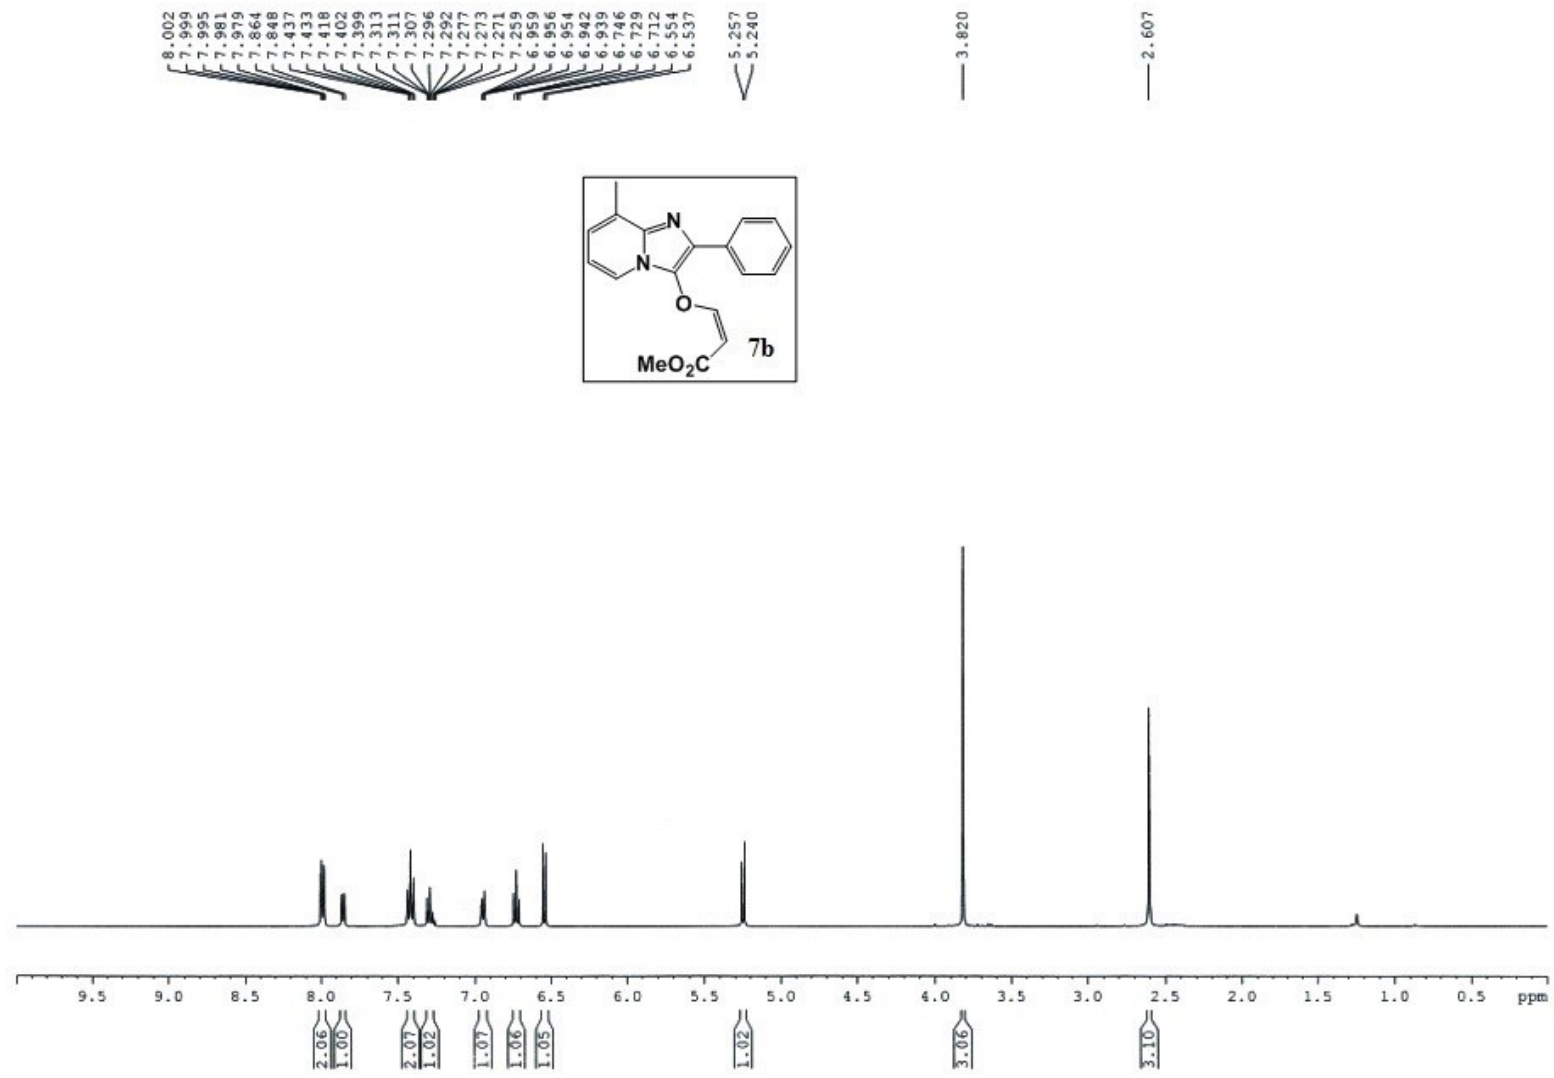

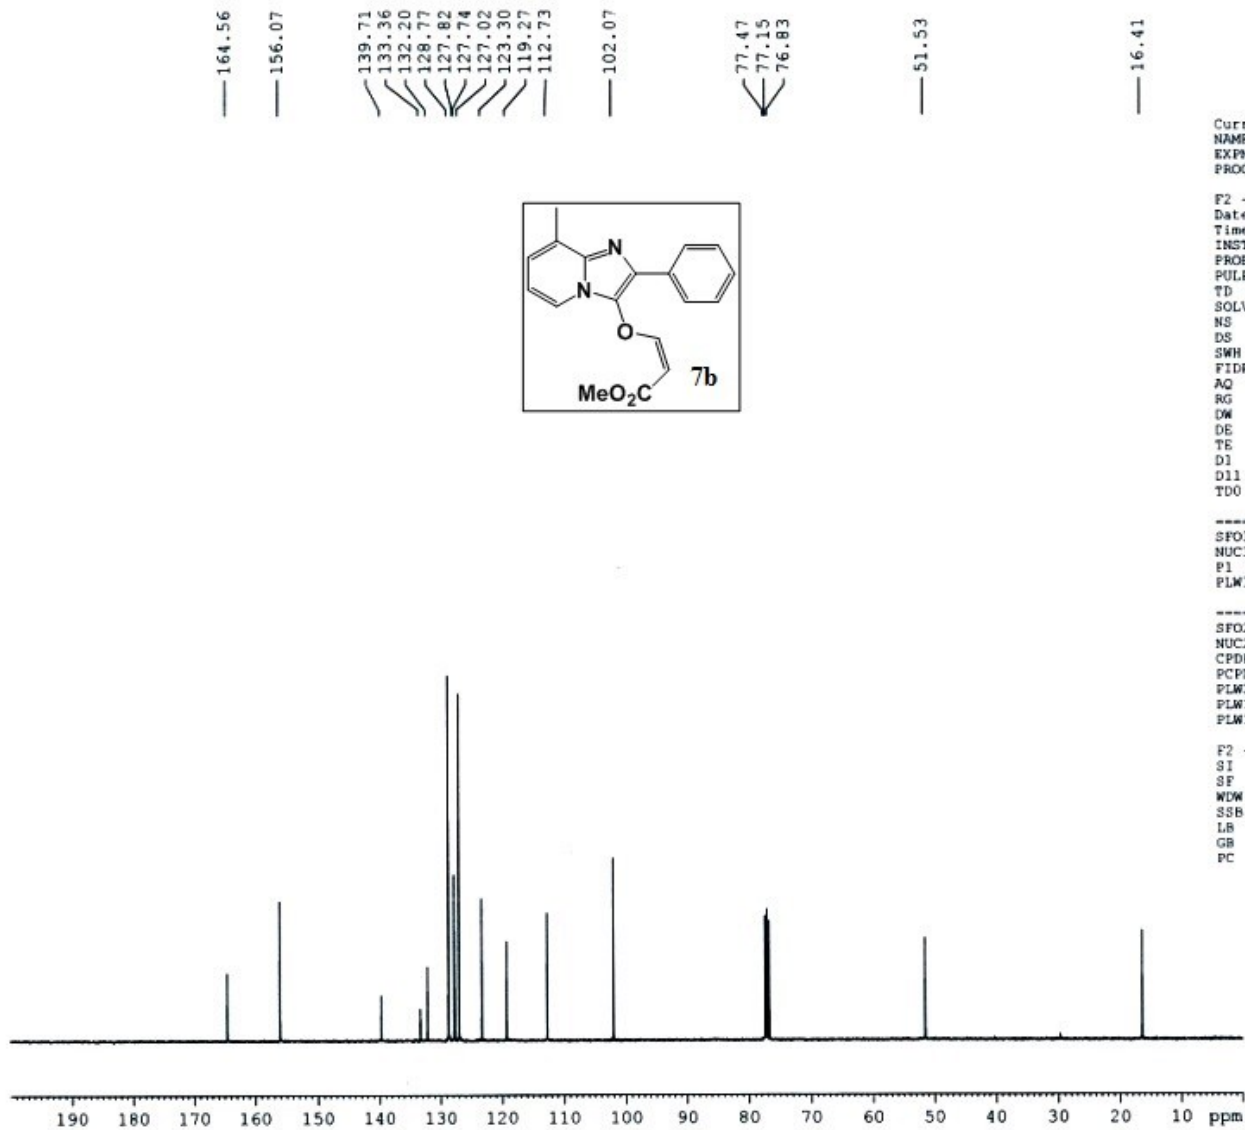

Current Data Parameters  
 NAME Dr.A.RAJRA 2016  
 EXPNO 497  
 PROCNO 1

F2 - Acquisition Parameters  
 Date\_ 20160613  
 Time 13.35  
 INSTRUM spect  
 PROBHD 5 mm PABBO BB/  
 PULPROG zgpg30  
 TD 32768  
 SOLVENT CDCl3  
 NS 320  
 DS 2  
 SWH 24038.461 Hz  
 FIDRES 0.733596 Hz  
 AQ 0.6815744 sec  
 RG 23.55  
 DW 20.800 usec  
 DE 6.50 usec  
 TE 299.3 K  
 D1 2.0000000 sec  
 D11 0.0300000 sec  
 TDO 1

----- CHANNEL f1 -----  
 SFO1 100.6278588 MHz  
 NUC1 13C  
 P1 8.90 usec  
 PLW1 54.00000000 W

----- CHANNEL f2 -----  
 SFO2 400.1516006 MHz  
 NUC2 1H  
 CPDPRG(2) waltz16  
 PCPD2 90.00 usec  
 PLW2 12.00000000 W  
 PLW12 0.32231000 W  
 PLW13 0.16212000 W

F2 - Processing parameters  
 SI 16384  
 SF 100.6177947 MHz  
 WDW EM  
 SSB 0  
 LB 1.00 Hz  
 GB 0  
 PC 1.40

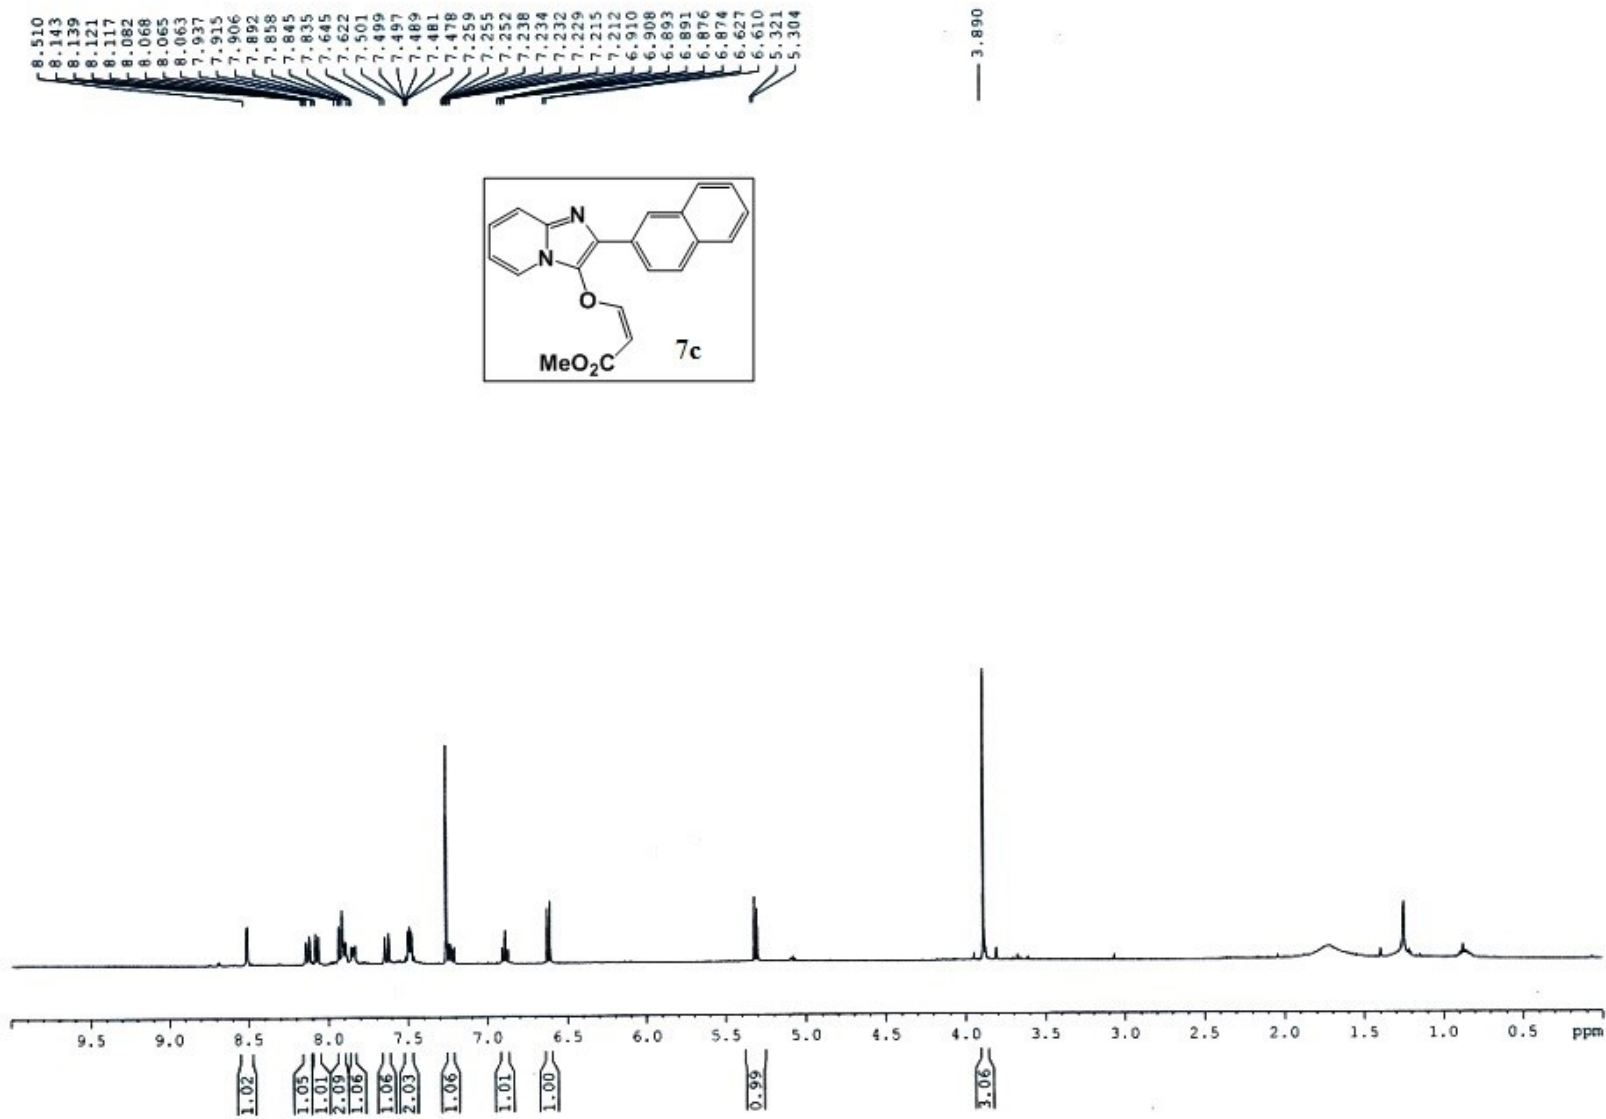

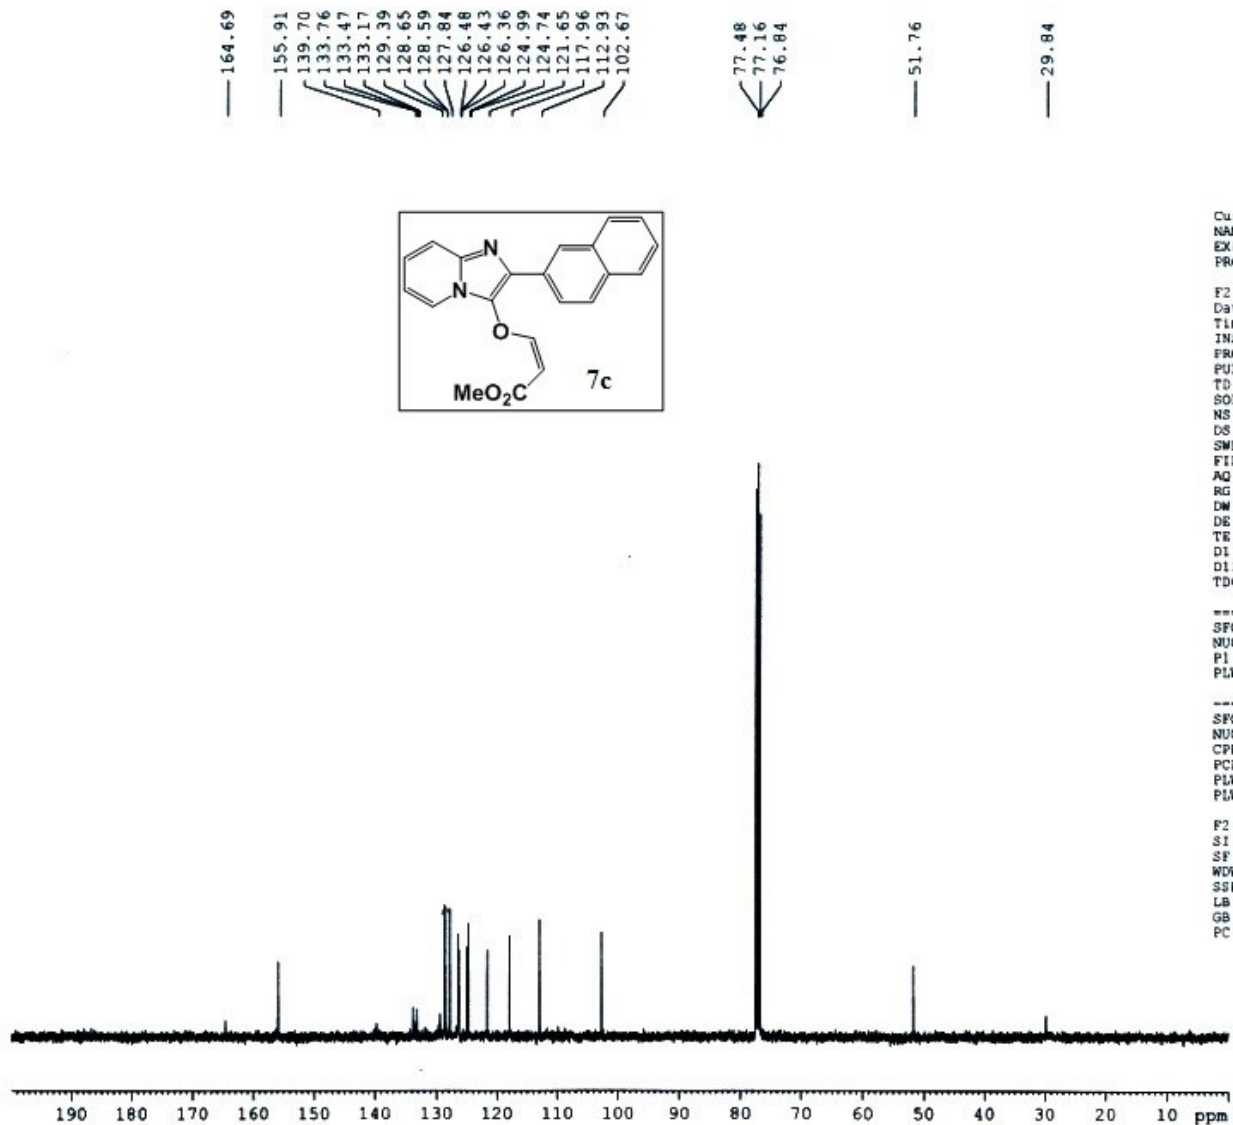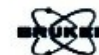

Current Data Parameters  
 NAME Dr.A.HAJRA 2017  
 EXPNO 1095  
 PROCNO 1

F2 - Acquisition Parameters  
 Date\_ 20170624  
 Time 22.13  
 INSTRUM spect  
 PROBHD 5 mm PABBO BB/  
 PULPROG zgdc  
 TD 32768  
 SOLVENT CDCl3  
 NS 2048  
 DS 2  
 SWH 24038.461 Hz  
 FIDRES 0.733596 Hz  
 AQ 0.6815744 sec  
 RG 186.42  
 DW 20.800 usec  
 DE 6.50 usec  
 TE 299.8 K  
 D1 2.00000000 sec  
 D11 0.03000000 sec  
 TDO 1

----- CHANNEL f1 -----  
 SFO1 100.6278588 MHz  
 NUC1 13C  
 P1 8.90 usec  
 PLW1 54.00000000 W

----- CHANNEL f2 -----  
 SFO2 400.1516006 MHz  
 NUC2 1H  
 CPDPRG[2] waltz16  
 PCPD2 90.00 usec  
 PLW2 12.00000000 W  
 PLW12 0.32231000 W

F2 - Processing parameters  
 SI 16384  
 SF 100.6177824 MHz  
 WDW EM  
 SSB 0  
 LB 1.00 Hz  
 GB 0  
 PC 1.40

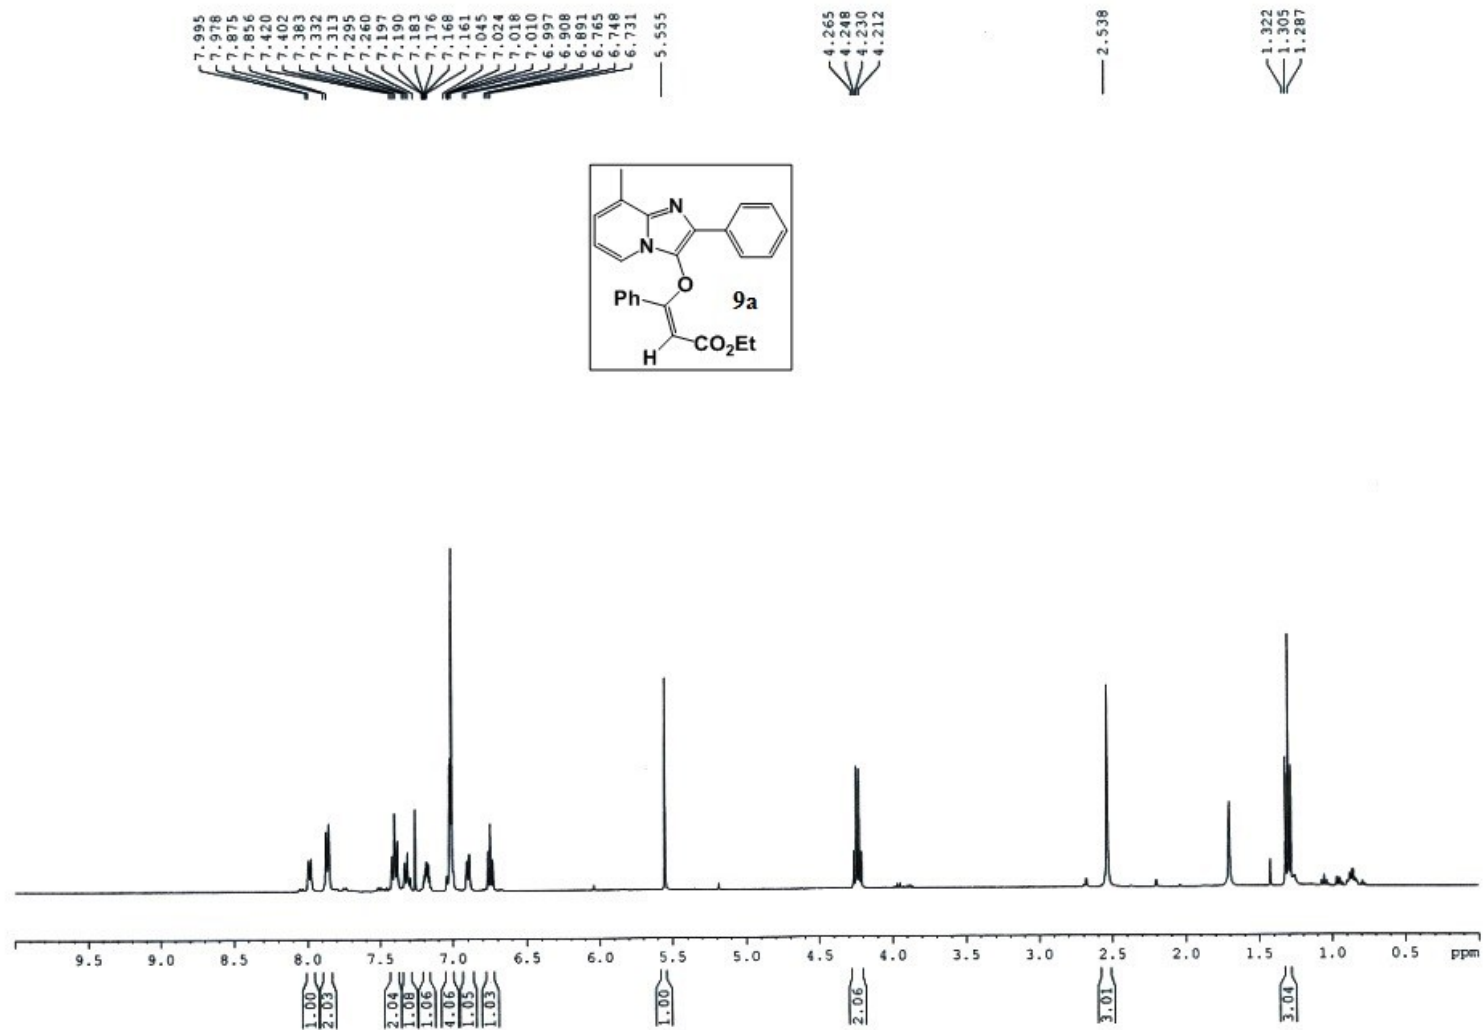

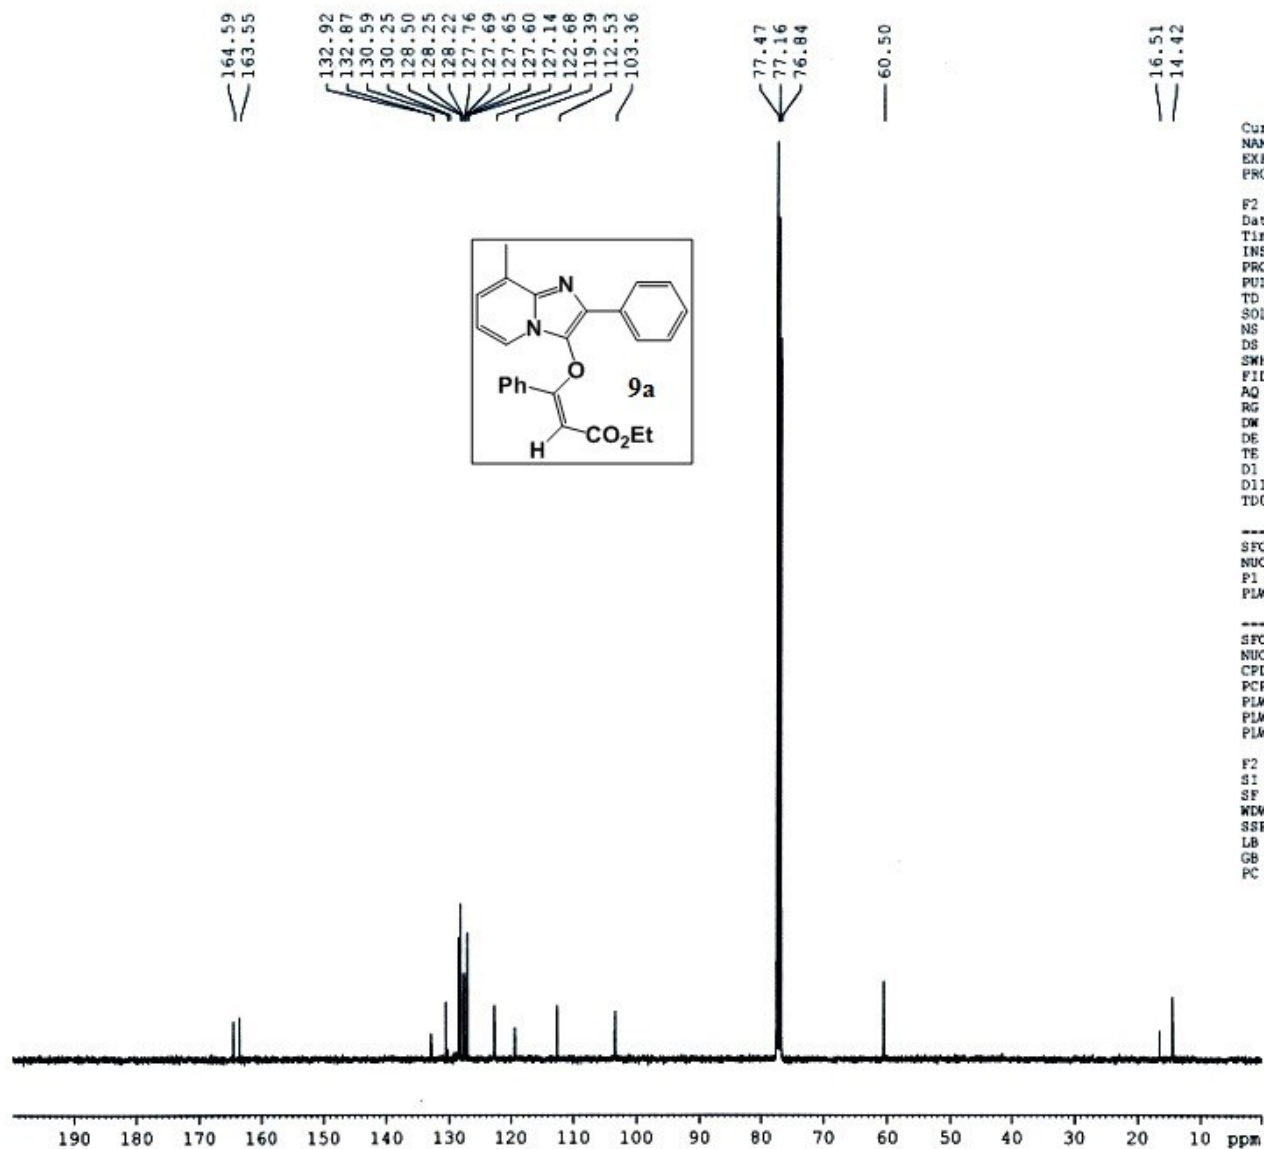

Current Data Parameters  
 NAME Dr.A.HAJRA 2016  
 EXPNO 1500  
 PROCNO 1

F2 - Acquisition Parameters  
 Date\_ 20170101  
 Time 11.45  
 INSTRUM spect  
 PROBHD 5 mm PABBO BB/  
 PULPROG zgpg30  
 TD 32768  
 SOLVENT CDC13  
 NS 640  
 DS 2  
 SWH 24038.461 Hz  
 FIDRES 0.733596 Hz  
 AQ 0.6815744 sec  
 RG 135.7  
 DM 20.800 usec  
 DE 6.50 usec  
 TE 294.3 K  
 D1 2.00000000 sec  
 D11 0.03000000 sec  
 TD0 1

----- CHANNEL f1 -----  
 SFO1 100.6278588 MHz  
 NUC1 13C  
 P1 8.90 usec  
 PLW1 54.00000000 W

----- CHANNEL f2 -----  
 SFO2 400.1516006 MHz  
 NUC2 1H  
 CPM2PRG2 waltz16  
 PCPD2 90.00 usec  
 PLW2 12.00000000 W  
 PLW12 0.32231000 W  
 PLW13 0.16212000 W

F2 - Processing parameters  
 SI 16384  
 SF 100.6177858 MHz  
 WDW EM  
 SSB 0  
 LB 1.00 Hz  
 GB 0  
 PC 1.40

HMBCGP

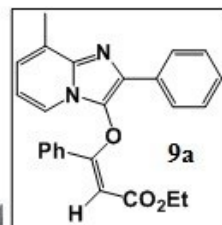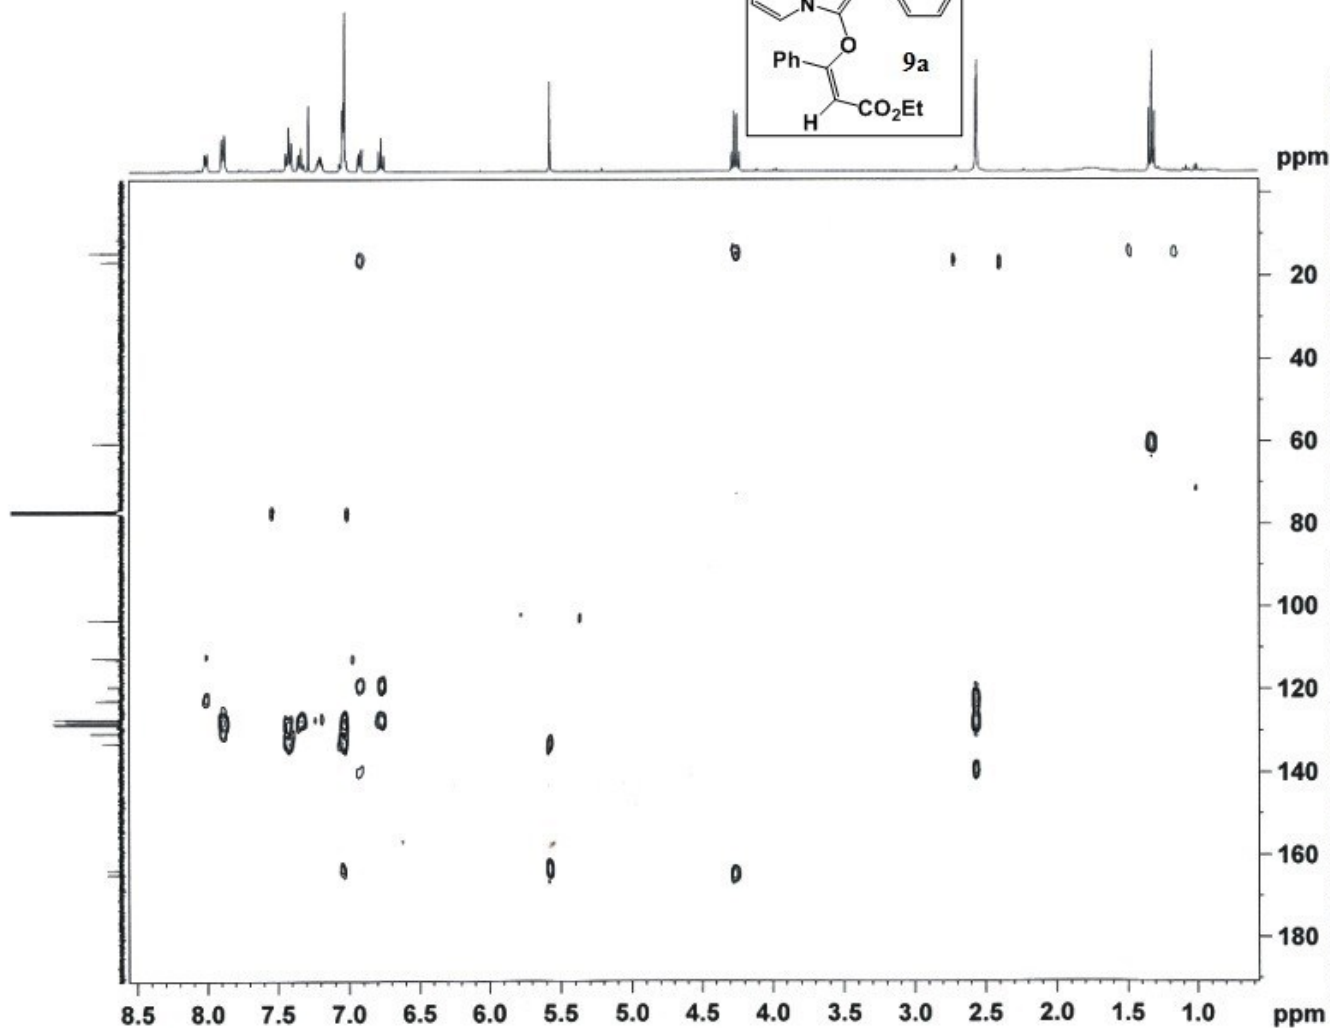

Current Data Parameters  
 NAME Dr.A.HARRA 2017  
 EXPNO 305  
 PROCNO 1

F2 - Acquisition Parameters  
 Date\_ 20170225  
 Time 16.26  
 INSTRUM spect  
 PROBHD 5 mm F4BBO BB/  
 PULPROG hbhcgplpndqf  
 TD 2048  
 SOLVENT CDCl3  
 NS 4  
 DS 16  
 SWE 5197.505 Hz  
 FIDRES 2.537844 Hz  
 AQ 0.1970176 sec  
 RG 186.42  
 DM 96.200 usec  
 DE 6.50 usec  
 TE 298.0 K  
 CHST2 145.0000000  
 CHST13 10.0000000  
 DO 0.00000300 sec  
 D1 1.50000000 sec  
 D2 0.00344828 sec  
 D4 0.00000000 sec  
 D16 0.00020000 sec  
 INO 0.0002240 sec

===== CHANNEL f1 =====  
 SF01 400.1520008 MHz  
 NUC1 1H  
 P1 14.75 usec  
 P2 29.50 usec  
 PLM1 12.00000000 M

===== CHANNEL f2 =====  
 SF02 100.6278593 MHz  
 NUC2 13C  
 P3 8.90 usec  
 PLM2 54.00000000 M

===== GRADIENT CHANNEL =====  
 GPMAM[1] SMSQ10.100  
 GPMAM[2] SMSQ10.100  
 GPMAM[3] SMSQ10.100  
 GPZ1 50.00 %  
 GPZ2 30.00 %  
 GPZ3 40.10 %  
 P16 1000.00 usec

F1 - Acquisition parameters  
 TD 63  
 SF01 100.6279 MHz  
 FIDRES 354.308380 Hz  
 DM 221.822 ppm  
 FwMODE QF

F2 - Processing parameters  
 SI 2048  
 SF 400.1500000 MHz  
 WIM SINE  
 SSB 0  
 LB 0 Hz  
 GB 0  
 PC 1.00

F1 - Processing parameters  
 SI 1024  
 MC2 QF  
 SF 100.6177975 MHz  
 WIM SINE  
 SSB 0  
 LB 0 Hz  
 GB 0

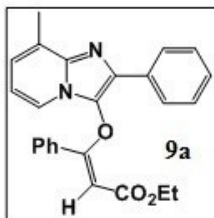

NOESYGPPH

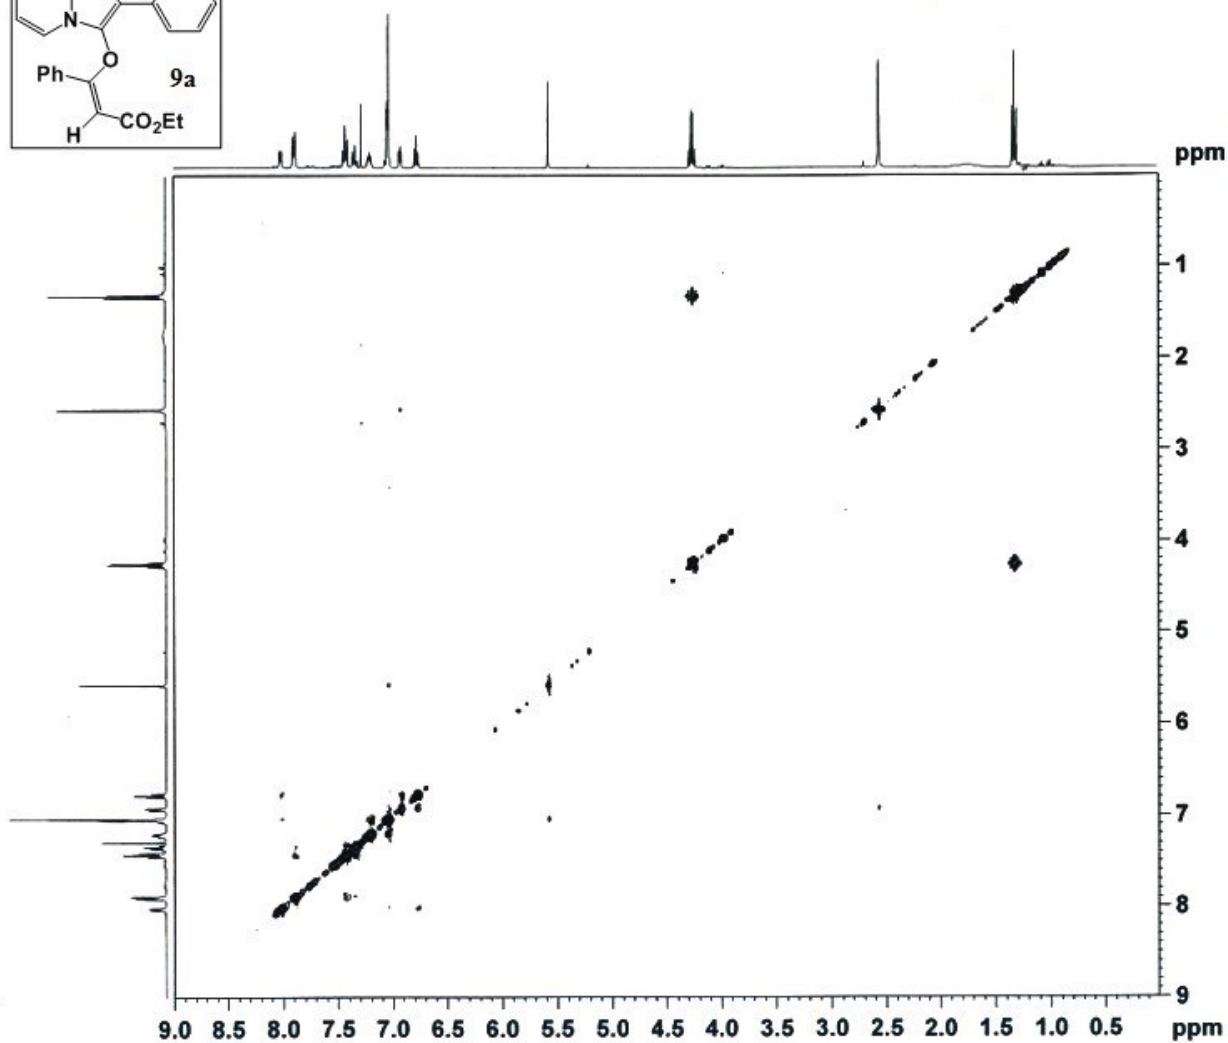

Current Data Parameters  
 NAME De.A.RAJRA 2017  
 EXPNO 302  
 PROCNO 1

F2 - Acquisition Parameters  
 Date\_ 20170225  
 Time 16.00  
 INSTRUM spect  
 PROBRD 5 mm PABBO BBV  
 PULPROG noesygpph  
 TD 2048  
 SOLVENT CDCl3  
 NS 2  
 DS 16  
 SWH 4000.000 Hz  
 FIDRES 1.953125 Hz  
 AQ 0.2560000 sec  
 RG 62.69  
 DW 125.000 usec  
 DE 6.50 usec  
 TE 296.0 K  
 D0 0.00010622 sec  
 D1 2.0000000 sec  
 D8 0.40000001 sec  
 D11 0.03000000 sec  
 D12 0.0002000 sec  
 D16 0.0002000 sec  
 IN0 0.00025000 sec

----- CHANNEL f1 -----  
 SFO1 400.1520008 MHz  
 NUC1 1H  
 P1 14.75 usec  
 P2 29.50 usec  
 P17 2500.00 usec  
 PLW1 12.0000000 W  
 PLW0 2.90079999 W

----- GRADIENT CHANNEL -----  
 GPRAM[1] SMSQ10.100  
 GF11 40.00 %  
 P16 1000.00 usec

F1 - Acquisition parameters  
 TD 256  
 SFO1 400.152 MHz  
 FIDRES 15.623000 Hz  
 SW 9.996 ppm  
 PRMODE States-TPPI

F2 - Processing parameters  
 SI 1024  
 SF 400.1500000 MHz  
 WCN QSINE  
 SSB 2  
 LB 0 Hz  
 GB 0  
 PC 1.00

F1 - Processing parameters  
 SI 1024  
 MC2 States-TPPI  
 SF 400.1500000 MHz  
 WCN QSINE  
 SSB 2  
 LB 0 Hz  
 GB 0



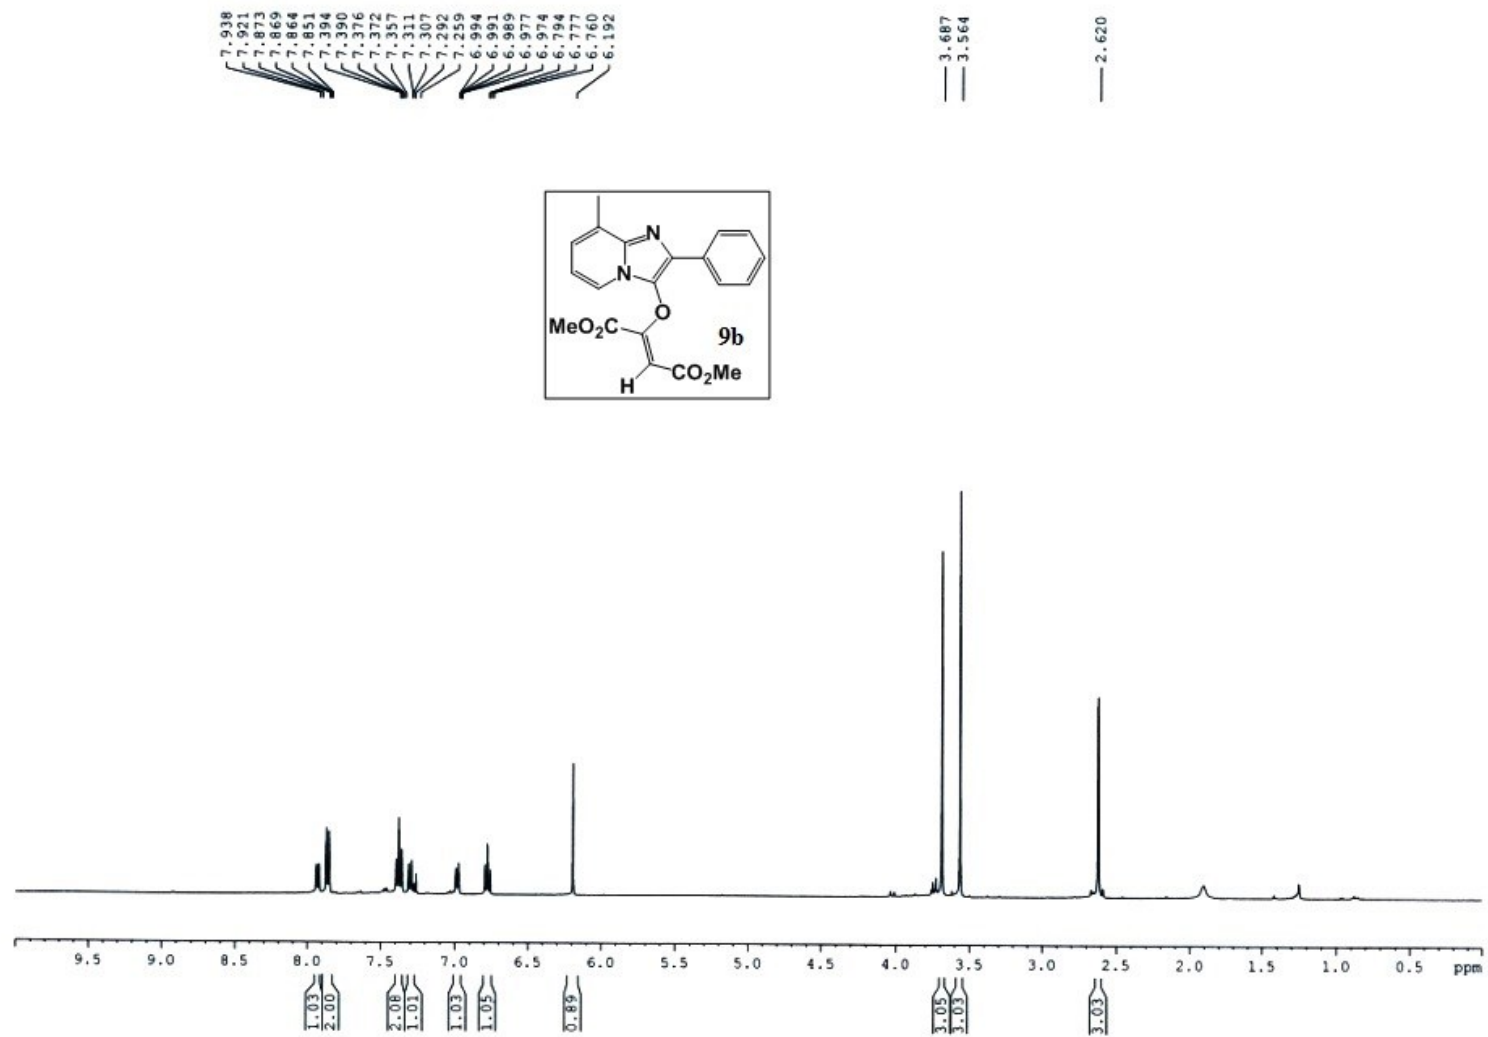

163.75  
161.42  
149.67  
139.88  
132.36  
131.40  
129.58  
128.48  
127.84  
127.69  
127.40  
123.23  
120.33  
112.27  
109.92

77.47  
77.15  
76.83

53.27  
52.18

16.54

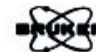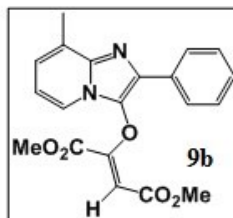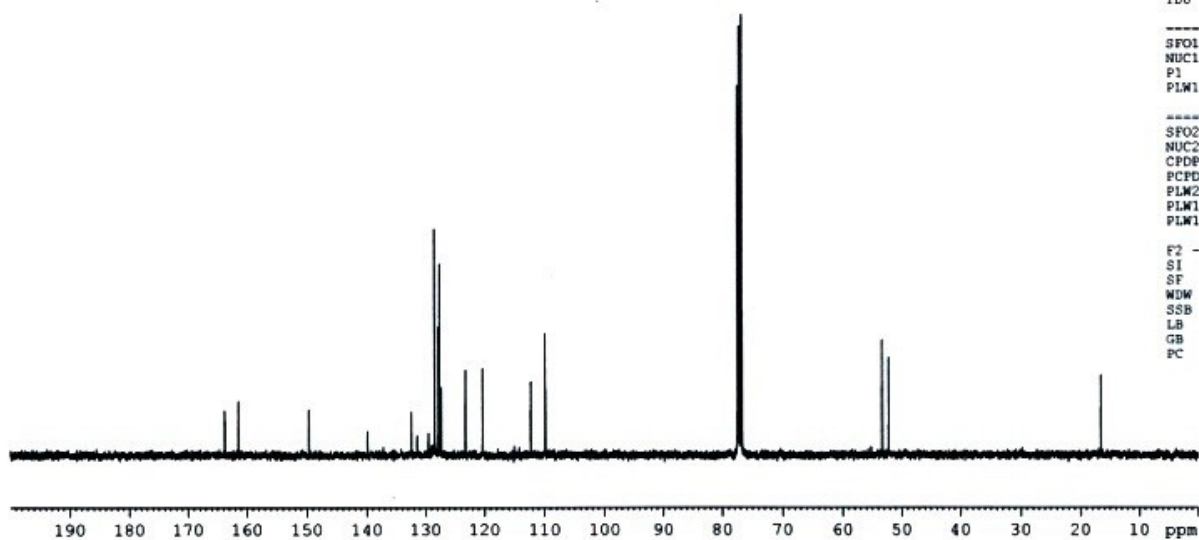

Current Data Parameters  
NAME Dr.A.HAJRA 2016  
EXPNO 775  
PROCNO 1

F2 - Acquisition Parameters  
Date\_ 20160802  
Time 17.27  
INSTRUM spect  
PROBHD 5 mm PABBO BB/  
PULPROG zgpg30  
TD 32768  
SOLVENT CDCl3  
NS 400  
DS 2  
SWH 24038.461 Hz  
FIDRES 0.733596 Hz  
AQ 0.6815744 sec  
RG 57.28  
DM 20.800 usec  
DE 6.50 usec  
TE 298.1 K  
D1 2.00000000 sec  
D11 0.03000000 sec  
TD0 1

----- CHANNEL f1 -----  
SFO1 100.6278588 MHz  
NUC1 13C  
P1 8.90 usec  
PLW1 54.00000000 W

----- CHANNEL f2 -----  
SFO2 400.1516006 MHz  
NUC2 1H  
CPDPRG2 waltz16  
PCPD2 90.00 usec  
PLW2 12.00000000 W  
PLW12 0.32231000 W  
PLW13 0.16212000 W

F2 - Processing parameters  
SI 16384  
SF 100.6177873 MHz  
WDW EM  
SSB 0  
LB 1.00 Hz  
GB 0  
PC 1.40

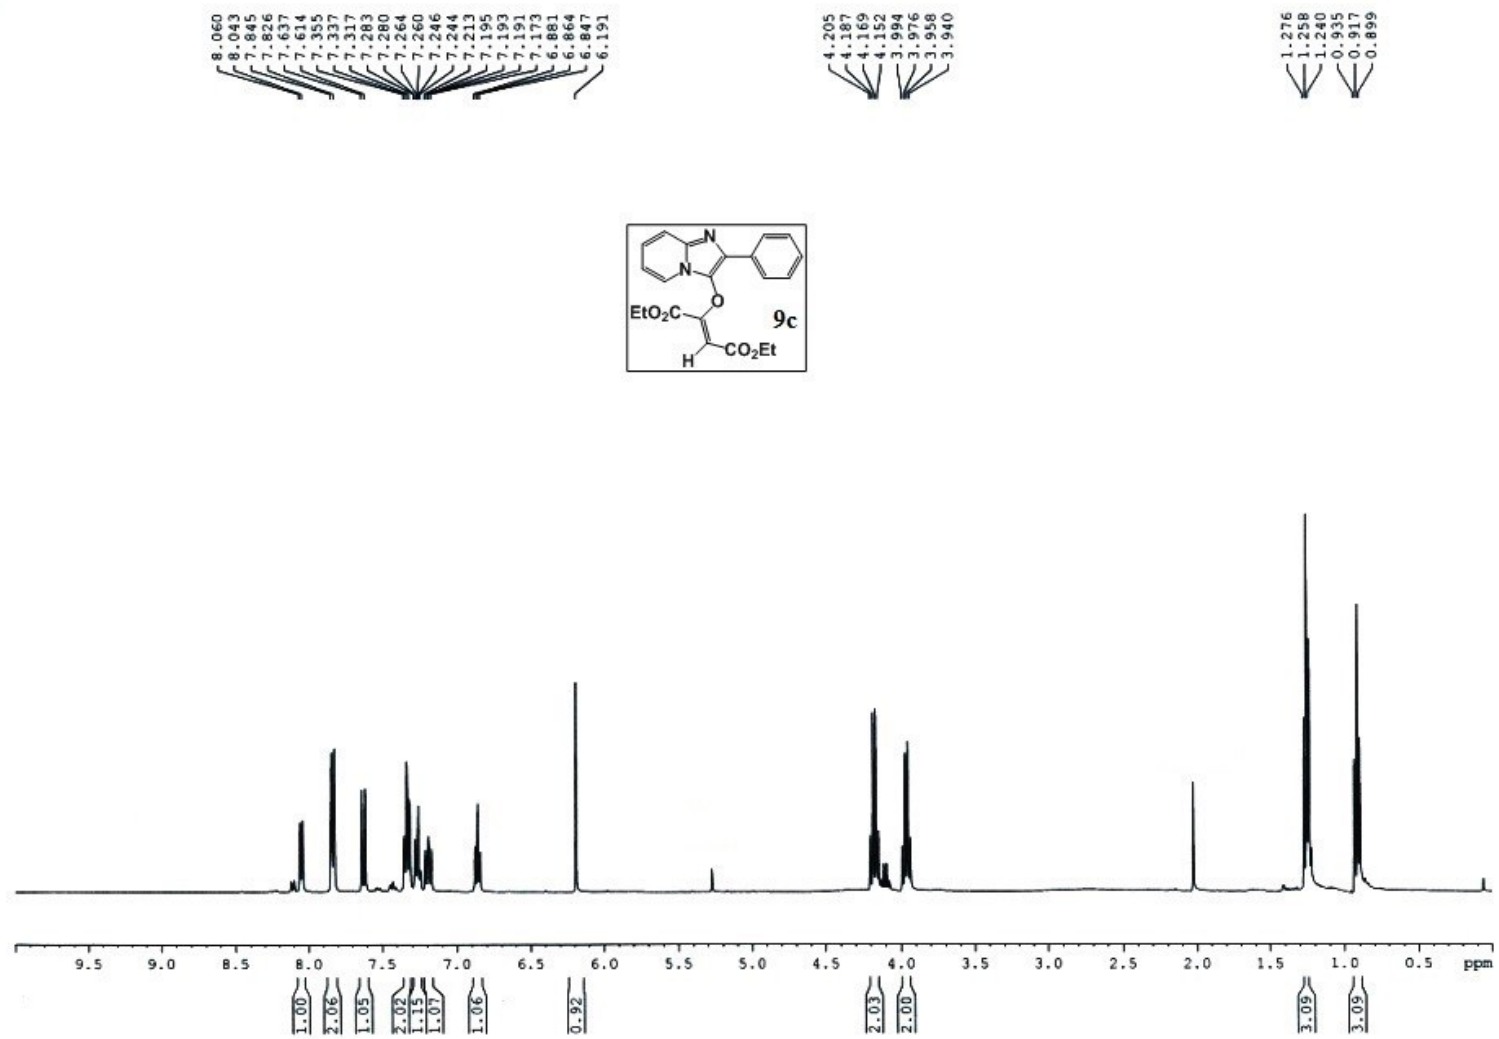

163.34  
160.87  
149.92  
139.46  
131.75  
131.32  
129.76  
128.43  
127.99  
127.61  
124.70  
122.51  
117.56  
112.33  
110.36

77.47  
77.15  
76.84  
62.63  
61.32

14.19  
13.60

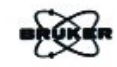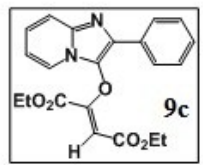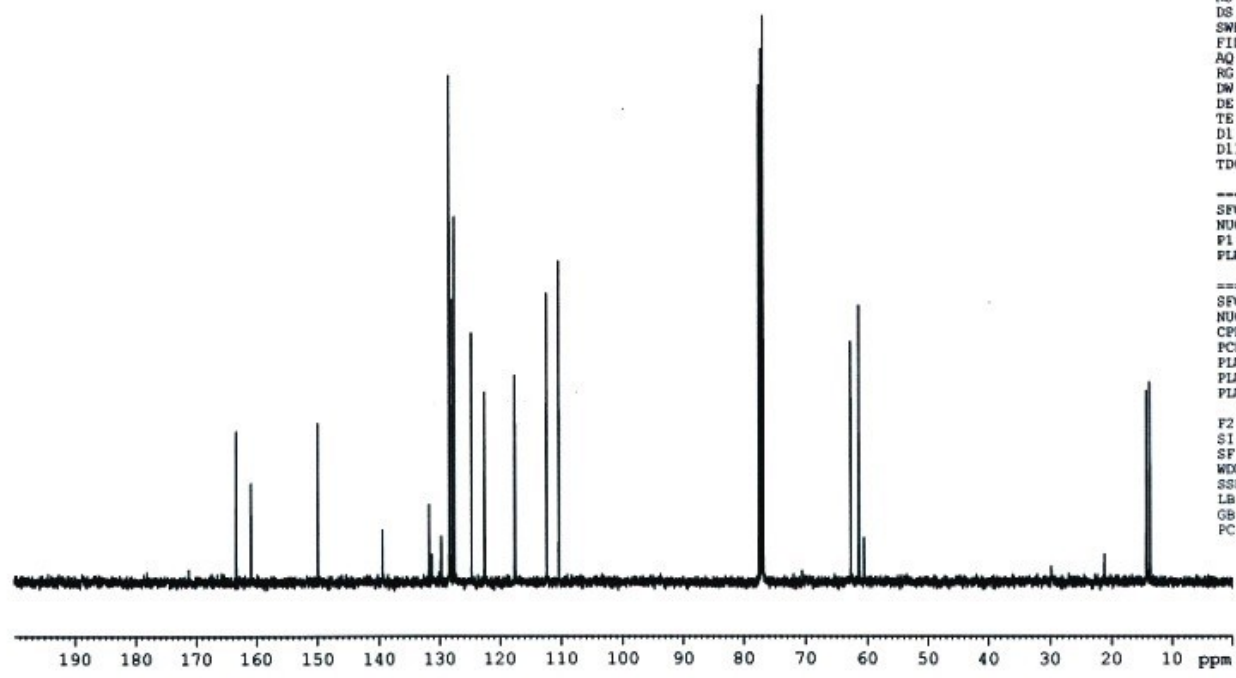

Current Data Parameters  
NAME Dr.A.HAJRA 2016  
EXPNO 783  
PROCNO 1

F2 - Acquisition Parameters  
Date\_ 20160803  
Time 17.49  
INSTRUM spect  
PROBHD 5 mm PABBO BB/  
PULPROG zgpg30  
TD 32768  
SOLVENT CDCL3  
NS 400  
DS 2  
SWH 24038.461 Hz  
FIDRES 0.733596 Hz  
AQ 0.6815744 sec  
RG 57.28  
DW 20.800 usec  
DE 6.50 usec  
TE 297.5 K  
D1 2.0000000 sec  
D11 0.0300000 sec  
TDO 1

----- CHANNEL f1 -----  
SFO1 100.6278588 MHz  
NUC1 13C  
P1 8.90 usec  
PLW1 54.0000000 W

----- CHANNEL f2 -----  
SFO2 400.1516006 MHz  
NUC2 1H  
CPDPRG12 waltz16  
PCPD2 90.00 usec  
PLW2 12.0000000 W  
PLW12 0.32231000 W  
PLW13 0.16212000 W

F2 - Processing parameters  
S1 16384  
SF 100.6177881 MHz  
WDW EM  
SSB 0  
LB 1.00 Hz  
GB 0  
PC 1.40

NOESYGPPH

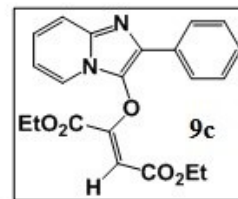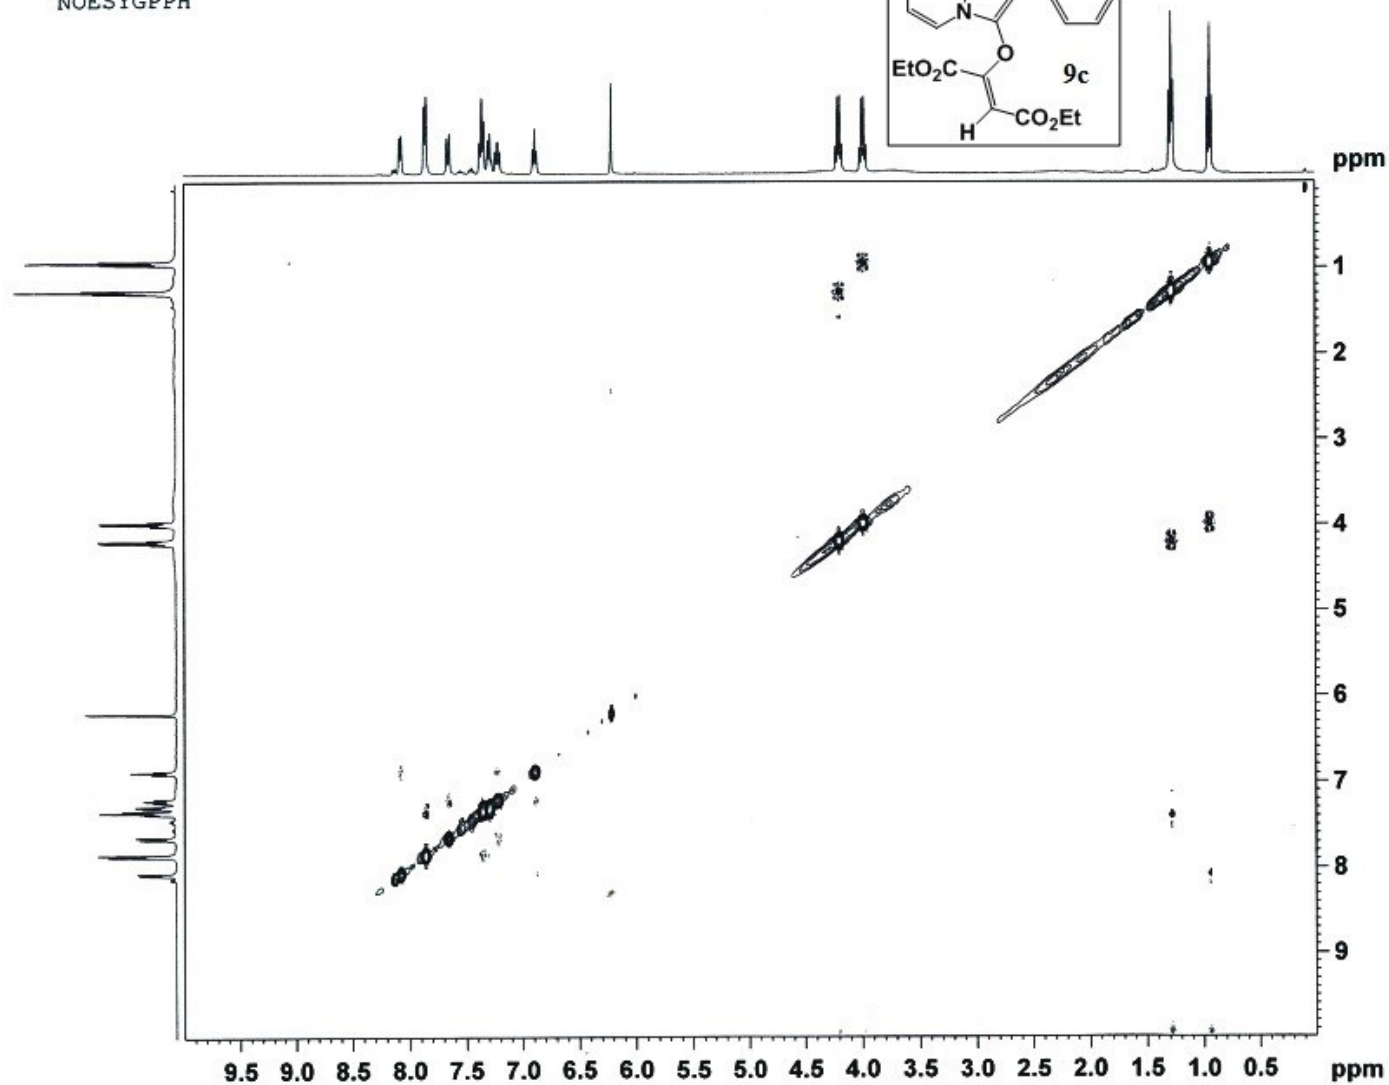

Current Data Parameters  
 NAME NOEST  
 EXPNO 2  
 PROCNO 1

F2 - Acquisition Parameters  
 Date\_ 20161001  
 Time 14.09  
 INSTRUM spect  
 PROBHD 5 mm PABBO BB/  
 PULPROG noesygpph  
 TD 2048  
 SOLVENT CDCl<sub>3</sub>  
 DS 2  
 OS 16  
 SWH 4000.000 Hz  
 FIDRES 1.953125 Hz  
 AQ 0.2560000 sec  
 RG 57.28  
 DW 125.000 usec  
 DE 6.50 usec  
 TE 299.0 K  
 DO 0.00010622 sec  
 D1 2.00000000 sec  
 D8 0.30000001 sec  
 D16 0.00020000 sec  
 INO 0.00025000 sec

----- CHANNEL f1 -----  
 SFO1 400.1520000 MHz  
 NUC1 1H  
 P1 14.75 usec  
 P2 29.50 usec  
 PLW1 12.00000000 W

----- GRADIENT CHANNEL -----  
 GPRAM[1] SMSQ10.100  
 GP21 40.00 V  
 P16 1000.00 usec

F1 - Acquisition parameters  
 TD 256  
 SFO1 400.152 MHz  
 FIDRES 15.625000 Hz  
 SW 9.996 ppm  
 FMODE TPPI

F2 - Processing parameters  
 SI 1024  
 SF 400.1500000 MHz  
 MDW QSINE  
 SSB 2  
 LB 0 Hz  
 GB 0  
 PC 4.00

F1 - Processing parameters  
 SI 1024  
 MC2 TPPI  
 SF 400.1500000 MHz  
 MDW QSINE  
 SSB 2  
 LB 0 Hz  
 GB 0
